# Supplementary material for: Immunoinformatics Identification of the Conserved and Cross-Reactive T-Cell Epitopes of SARS-CoV-2 with Human Common Cold Coronaviruses, SARS-CoV, MERS-CoV and Live Attenuated Vaccines Presented by HLA Alleles of Indonesian Population
Source: MDPI journal article supplement (doi:10.3390/v14112328), 2022-10-24
Supplement: s1 [file s1]

## Supplementary Materials

**Table S1.** Full list of predicted 9-mer CTL epitopes from five different SARS-CoV-2 proteins (ORF1ab, S, E, M, and N) with %Rank less than 1% identified from NetCTLpan 1.1 along with their immunogenicity score. A total of 414 promiscuous peptides (bind to more than one different HLA alleles) out of 1,599 predicted peptides were identified and indicated by green color highlight. A total of 1,299 peptides with positive immunogenicity scores are identified and highlighted by bold-colored text.

| Protein | Start Residue | Peptide   | HLA Class I Allele                                 | Immunogenicity |
|---------|---------------|-----------|----------------------------------------------------|----------------|
| ORF1ab  | 2             | SLVPGFNEK | HLA-A*11:01                                        | <b>0.08077</b> |
|         | 44            | HLKDGTCGL | HLA-A*02:03                                        | <b>0.40234</b> |
|         | 64            | EQPYVFIKR | HLA-A*33:03                                        | <b>0.07638</b> |
|         | 83            | VMVELVAEL | HLA-A*02:01, HLA-A*02:03                           | <b>0.22188</b> |
|         | 109           | HVGEIPVAY | HLA-B*15:02, HLA-B*15:21, HLA-B*35:05              | -0.24214       |
|         | 115           | VAYRKVLLR | HLA-A*33:03                                        | <b>0.08565</b> |
|         | 134           | SYGADLKSF | HLA-A*24:02, HLA-A*24:07                           | <b>0.29037</b> |
|         | 140           | KSFDLGDEL | HLA-B*58:01                                        | <b>0.10192</b> |
|         | 175           | ELNGGAYTR | HLA-A*33:03                                        | <b>0.04585</b> |
|         | 181           | YTRYVDNNF | HLA-B*15:02, HLA-B*15:13, HLA-B*35:05              | <b>0.17504</b> |
|         | 231           | REHEHEIAW | HLA-B*18:01, HLA-B*44:03                           | -0.01938       |
|         | 246           | KSYELQTPF | HLA-B*15:02, HLA-B*15:13, HLA-B*15:21, HLA-B*58:01 | <b>0.05549</b> |
|         | 248           | YELQTPFEI | HLA-B*18:01, HLA-B*38:02, HLA-B*44:03              | <b>0.05473</b> |
|         | 250           | LQTPFEIKL | HLA-B*38:02                                        | <b>0.11198</b> |
|         | 254           | FEIKLAKKF | HLA-B*18:01, HLA-B*44:03                           | <b>0.01738</b> |
|         | 257           | KLAKKFDTF | HLA-A*24:02, HLA-A*24:07                           | -0.05331       |
|         | 278           | SIKTIQPR  | HLA-A*33:03, HLA-A*34:01                           | -0.24371       |
|         | 281           | KTIQPRVEK | HLA-A*11:01                                        | <b>0.21515</b> |
|         | 295           | FMGRIRSVY | HLA-B*15:02, HLA-B*15:13, HLA-B*15:21, HLA-B*35:05 | <b>0.23703</b> |
|         | 312           | NQMCLSTLM | HLA-B*15:02, HLA-B*15:21, HLA-B*38:02              | <b>0.11957</b> |
|         | 313           | QMCLSTLMK | HLA-A*11:01                                        | -0.10819       |
|         | 340           | CEFCGTENL | HLA-B*18:01, HLA-B*38:02, HLA-B*44:03              | -0.0585        |
|         | 350           | KEGATTCGY | HLA-B*44:03                                        | -0.03267       |
|         | 375           | SEVGPEHSL | HLA-B*18:01, HLA-B*38:02, HLA-B*44:03              | -0.17836       |
|         | 388           | NESGLKTIL | HLA-B*18:01, HLA-B*38:02                           | <b>0.04268</b> |
|         | 402           | TIAFGGCVF | HLA-B*15:02, HLA-B*15:21                           | -0.29177       |
|         | 410           | FSYVGCHNK | HLA-A*11:01                                        | <b>0.14136</b> |
|         | 444           | GLNDNLLEI | HLA-A*02:01, HLA-A*02:03                           | <b>0.2593</b>  |
|         | 467           | KLNEEIAII | HLA-A*02:01, HLA-A*02:03                           | -0.01088       |
|         | 471           | EIAILASF  | HLA-A*34:01                                        | <b>0.15254</b> |
|         | 478           | SFSASTSAF | HLA-A*02:01, HLA-A*02:03, HLA-B*15:21              | <b>0.01528</b> |
|         | 482           | STSAFVETV | HLA-A*02:03                                        | -0.08747       |
|         | 483           | TSAFVETVK | HLA-A*11:01                                        | <b>0.07779</b> |

|  |     |           |                                                    |                |
|--|-----|-----------|----------------------------------------------------|----------------|
|  | 487 | VETVKGLDY | HLA-B*18:01, HLA-B*44:03                           | 5.00E-05       |
|  | 488 | ETVKGLDYK | HLA-A*34:01                                        | -0.25068       |
|  | 527 | SILSPLYAF | HLA-B*15:02, HLA-B*15:21, HLA-B*35:05              | -0.12032       |
|  | 528 | ILSPLYAFA | HLA-A*02:01, HLA-A*02:03                           | -0.04988       |
|  | 533 | YAFASEAAR | HLA-A*33:03                                        | -0.02103       |
|  | 541 | RVVRSIFSR | HLA-A*11:01, HLA-A*33:03                           | <b>0.29466</b> |
|  | 552 | ETAQNSVRV | HLA-A*34:01                                        | -0.12893       |
|  | 567 | TILDGISQY | HLA-A*34:01, HLA-B*15:21                           | <b>0.12336</b> |
|  | 603 | GVVQLTSQW | HLA-B*58:01                                        | <b>0.09967</b> |
|  | 611 | WLTNIFGTV | HLA-A*02:01, HLA-A*02:03                           | <b>0.10481</b> |
|  | 612 | LTNIFGTVY | HLA-B*15:02, HLA-B*15:13, HLA-B*15:21              | <b>0.13401</b> |
|  | 614 | NIFGTVYEK | HLA-A*11:01, HLA-A*34:01                           | <b>0.08228</b> |
|  | 615 | IFGTVYEKL | HLA-A*24:02, HLA-A*24:07                           | -0.09755       |
|  | 618 | TVYEKLKPV | HLA-A*34:01                                        | -0.27795       |
|  | 622 | KLKPVLDWL | HLA-A*02:01, HLA-A*02:03                           | -0.0704        |
|  | 640 | FLRDGWEIV | HLA-A*02:03                                        | <b>0.0312</b>  |
|  | 669 | EIKESVQTF | HLA-B*15:02, HLA-B*15:21                           | <b>0.00679</b> |
|  | 675 | QTFKLVNK  | HLA-A*11:01, HLA-A*33:03                           | <b>0.03596</b> |
|  | 676 | TFFKLVNKF | HLA-A*24:02, HLA-A*24:07                           | -0.24674       |
|  | 679 | KLVNKLAL  | HLA-A*02:01, HLA-A*02:03                           | -0.12198       |
|  | 700 | KALNLGETF | HLA-B*58:01                                        | <b>0.26806</b> |
|  | 701 | ALNLGETFV | HLA-A*02:01, HLA-A*02:03                           | <b>0.11952</b> |
|  | 708 | FVTHSKGLY | HLA-A*34:01                                        | <b>0.05558</b> |
|  | 709 | VTHSKGLYR | HLA-A*33:03                                        | <b>0.18902</b> |
|  | 724 | EETGLLMPL | HLA-B*18:01, HLA-B*38:02, HLA-B*44:03              | <b>0.2193</b>  |
|  | 728 | LLMPLKAPK | HLA-A*11:01                                        | -0.22846       |
|  | 743 | GETLPTEVL | HLA-B*44:03                                        | <b>0.01803</b> |
|  | 765 | LEQPTSEAV | HLA-B*44:03                                        | -0.19814       |
|  | 790 | LEIKDEKY  | HLA-B*18:01, HLA-B*44:03                           | <b>0.16486</b> |
|  | 804 | NMMVTNNTF | HLA-B*15:02, HLA-B*15:13, HLA-B*15:21, HLA-B*35:05 | <b>0.23433</b> |
|  | 806 | MVTNNTFTL | HLA-A*34:01                                        | <b>0.11013</b> |
|  | 807 | VTNNTFTLK | HLA-A*11:01                                        | <b>0.177</b>   |
|  | 828 | TVIEVQGYK | HLA-A*11:01, HLA-A*34:01                           | <b>0.33203</b> |
|  | 834 | GYKSVNITF | HLA-A*24:02, HLA-A*24:07                           | -0.01928       |
|  | 836 | KSVNITFEL | HLA-B*58:01                                        | <b>0.08112</b> |
|  | 847 | RIDKVLNEK | HLA-A*11:01                                        | <b>0.08112</b> |
|  | 851 | VLNEKCSAY | HLA-B*15:02, HLA-B*15:21                           | -0.0521        |
|  | 853 | NEKCSAYTV | HLA-B*18:01                                        | <b>0.29543</b> |
|  | 859 | YTVELGTEV | HLA-A*34:01                                        | -0.06319       |
|  | 866 | EVNEFACVV | HLA-A*34:01                                        | <b>0.20722</b> |

|  |      |           |                                                                                                        |                |
|--|------|-----------|--------------------------------------------------------------------------------------------------------|----------------|
|  | 877  | AVIKTLQPV | HLA-A*02:01, HLA-A*02:03                                                                               | <b>0.10025</b> |
|  | 880  | KTLQPVSEL | HLA-B*58:01                                                                                            | -0.02077       |
|  | 886  | SELLTPLGI | HLA-B*44:03                                                                                            | -0.18359       |
|  | 897  | DEWSMATYY | HLA-B*18:01, HLA-B*44:03                                                                               | -0.15173       |
|  | 899  | WSMATYYLF | HLA-A*24:02, HLA-A*24:07, HLA-B*15:02, HLA-B*15:13, HLA-B*15:21, HLA-B*18:01, HLA-B*35:05, HLA-B*58:01 | <b>0.00742</b> |
|  | 905  | YLFDESGEF | HLA-A*02:01, HLA-A*02:03, HLA-B*35:05                                                                  | <b>0.14296</b> |
|  | 911  | GEFKLASHM | HLA-B*18:01, HLA-B*44:03                                                                               | -0.11053       |
|  | 915  | LASHMYCSF | HLA-B*15:02, HLA-B*15:13, HLA-B*15:21, HLA-B*35:05, HLA-B*58:01                                        | -0.12588       |
|  | 916  | ASHMYCSFY | HLA-A*11:01                                                                                            | -0.1748        |
|  | 938  | EEFEPSTQY | HLA-B*44:03                                                                                            | -0.01086       |
|  | 940  | FEPSTQYFY | HLA-B*18:01, HLA-B*44:03                                                                               | -0.29837       |
|  | 946  | YFYGTEDDY | HLA-B*18:01, HLA-B*44:03                                                                               | <b>0.13906</b> |
|  | 953  | DYQKGPLEF | HLA-A*24:02, HLA-A*24:07                                                                               | <b>0.06337</b> |
|  | 959  | LEFGATSAA | HLA-B*18:01                                                                                            | -0.17982       |
|  | 999  | TTIQTIVEV | HLA-A*34:01                                                                                            | -0.28092       |
|  | 1005 | VEVQPQLEM | HLA-B*18:01, HLA-B*44:03                                                                               | <b>0.13404</b> |
|  | 1011 | LEMELTPVV | HLA-B*18:01, HLA-B*38:02, HLA-B*44:03                                                                  | -0.0627        |
|  | 1022 | IEVNSFSGY | HLA-B*18:01, HLA-B*44:03                                                                               | -0.02539       |
|  | 1023 | EVNSFSGYL | HLA-A*34:01                                                                                            | -0.12922       |
|  | 1030 | YLKLTENVY | HLA-B*15:02, HLA-B*15:21                                                                               | -0.15837       |
|  | 1032 | KLTENVYIK | HLA-A*11:01                                                                                            | <b>0.19528</b> |
|  | 1054 | TVVVNAANV | HLA-A*34:01                                                                                            | <b>0.32162</b> |
|  | 1055 | VVVNAANVY | HLA-B*15:02, HLA-B*15:21                                                                               | <b>0.20214</b> |
|  | 1103 | VLSGHNLAH | HLA-A*11:01                                                                                            | -0.16657       |
|  | 1108 | NLAHCLHV  | HLA-A*02:03                                                                                            | -0.00438       |
|  | 1115 | HVVGPVNVK | HLA-A*11:01                                                                                            | <b>0.12139</b> |
|  | 1134 | YENFNQHEV | HLA-B*18:01, HLA-B*38:02, HLA-B*44:03                                                                  | <b>0.05026</b> |
|  | 1140 | HEVLLAPLL | HLA-B*18:01, HLA-B*38:02, HLA-B*44:03                                                                  | <b>0.17137</b> |
|  | 1145 | APLLSAGIF | HLA-B*35:05                                                                                            | <b>0.1294</b>  |
|  | 1147 | LLSAGIFGA | HLA-A*02:01                                                                                            | -0.18658       |
|  | 1169 | RTNVYLAVF | HLA-B*58:01                                                                                            | -0.20081       |
|  | 1171 | NVYLAVFDK | HLA-A*11:01                                                                                            | -0.32885       |
|  | 1181 | LYDKLVSSF | HLA-A*24:02, HLA-A*24:07                                                                               | <b>0.02993</b> |
|  | 1184 | KLVSSFLEM | HLA-B*15:02, HLA-B*15:21                                                                               | -0.1653        |
|  | 1185 | LVSSFLEMK | HLA-A*11:01                                                                                            | <b>0.02089</b> |
|  | 1205 | IPKEEVKPF | HLA-B*35:05                                                                                            | <b>0.08438</b> |
|  | 1213 | FITESKPSV | HLA-A*02:03                                                                                            | -0.06827       |
|  | 1216 | ESKPSVEQR | HLA-A*33:03                                                                                            | <b>0.25781</b> |

|  |      |           |                                                                    |                |
|--|------|-----------|--------------------------------------------------------------------|----------------|
|  | 1230 | KIKACVEEV | HLA-A*02:03                                                        | -0.16448       |
|  | 1254 | LYIDINGNL | HLA-A*24:02, HLA-A*24:07                                           | <b>0.2052</b>  |
|  | 1269 | LVSDIDITF | HLA-B*15:02, HLA-B*15:13, HLA-B*15:21, HLA-B*35:05,<br>HLA-B*58:01 | <b>0.2281</b>  |
|  | 1277 | FLKKDAPYI | HLA-A*02:03                                                        | -0.18386       |
|  | 1295 | LTAVVIPTK | HLA-A*11:01                                                        | <b>0.20624</b> |
|  | 1311 | MLAKALRKV | HLA-A*02:03                                                        | <b>0.09181</b> |
|  | 1328 | YPGQGLNGY | HLA-B*35:05                                                        | -0.04849       |
|  | 1364 | QEILGTVSW | HLA-B*18:01, HLA-B*44:03                                           | -0.16397       |
|  | 1366 | ILGTVSWNL | HLA-A*02:01                                                        | <b>0.07671</b> |
|  | 1373 | NLREMLAHA | HLA-A*02:03                                                        | <b>0.2227</b>  |
|  | 1393 | ETKAIVSTI | HLA-A*34:01                                                        | -0.45577       |
|  | 1429 | TVASLINTL | HLA-A*34:01                                                        | <b>0.33479</b> |
|  | 1432 | SLINTLNDL | HLA-A*02:03                                                        | -0.4751        |
|  | 1441 | NETLVTMPL | HLA-B*18:01, HLA-B*38:02, HLA-B*44:03                              | -0.1606        |
|  | 1498 | EHFIETISL | HLA-B*38:02                                                        | -0.18593       |
|  | 1502 | ETISLAGSY | HLA-A*34:01                                                        | -0.02225       |
|  | 1503 | TISLAGSYK | HLA-A*11:01                                                        | -0.12476       |
|  | 1520 | TQLGIEFLK | HLA-A*11:01                                                        | -0.35677       |
|  | 1526 | FLKRGDKSV | HLA-A*02:03                                                        | <b>0.15015</b> |
|  | 1535 | YYTSNPPTF | HLA-A*24:02, HLA-A*24:07                                           | <b>0.3263</b>  |
|  | 1537 | TSNPPTFHL | HLA-B*58:01                                                        | <b>0.24962</b> |
|  | 1547 | GEVITFDNL | HLA-B*44:03                                                        | <b>0.33519</b> |
|  | 1548 | EVITFDNLK | HLA-A*34:01                                                        | -0.22258       |
|  | 1554 | NLKTLLSLR | HLA-A*33:03                                                        | -0.24009       |
|  | 1562 | REVRTIKVF | HLA-B*44:03                                                        | -0.2427        |
|  | 1565 | RTIKVFTTV | HLA-A*02:03, HLA-A*24:07, HLA-A*34:01                              | -0.27622       |
|  | 1581 | QVVDMSMTY | HLA-A*34:01, HLA-B*15:02, HLA-B*15:13, HLA-B*15:21,<br>HLA-B*35:05 | -0.1306        |
|  | 1585 | MSMTYGQQF | HLA-B*15:02, HLA-B*15:13, HLA-B*15:21, HLA-B*35:05,<br>HLA-B*58:01 | -0.24791       |
|  | 1612 | HEGKTFYVL | HLA-B*18:01, HLA-B*38:02, HLA-B*44:03                              | <b>0.25596</b> |
|  | 1625 | TLRVEAFEY | HLA-B*15:02, HLA-B*15:21                                           | -0.04828       |
|  | 1633 | YYHTTDPSF | HLA-A*24:02, HLA-A*24:07                                           | <b>0.08212</b> |
|  | 1634 | YHTTDPSFL | HLA-B*38:02                                                        | <b>0.44289</b> |
|  | 1641 | FLGRYMSAL | HLA-A*02:01, HLA-A*02:03                                           | <b>0.1259</b>  |
|  | 1645 | YMSALNHTK | HLA-A*11:01                                                        | <b>0.00668</b> |
|  | 1646 | MSALNHTKK | HLA-A*11:01                                                        | -0.41789       |
|  | 1647 | SALNHTKKW | HLA-B*58:01                                                        | <b>0.16197</b> |
|  | 1674 | YLATALTL  | HLA-A*02:01, HLA-A*02:03                                           | <b>0.32837</b> |

|  |      |            |                                                                                                                     |                |
|--|------|------------|---------------------------------------------------------------------------------------------------------------------|----------------|
|  | 1690 | NPPALQDAY  | HLA-B*35:05                                                                                                         | <b>0.12163</b> |
|  | 1704 | GEAANFCAL  | HLA-B*38:02, HLA-B*44:03                                                                                            | <b>0.04611</b> |
|  | 1711 | ALILAYCNK  | HLA-A*11:01                                                                                                         | <b>0.08979</b> |
|  | 1726 | DVRETMSYL  | HLA-A*34:01                                                                                                         | -0.03442       |
|  | 1732 | SYLFQHANL  | HLA-A*24:02, HLA-A*24:07                                                                                            | <b>0.28227</b> |
|  | 1765 | EAVMYMGTL  | HLA-A*34:01                                                                                                         | <b>0.19398</b> |
|  | 1767 | VMYMGTLISY | HLA-A*11:01, HLA-A*34:01, HLA-B*15:02, HLA-B*15:13, HLA-B*15:21, HLA-B*18:01, HLA-B*35:05, HLA-B*44:03, HLA-B*58:01 | -0.03831       |
|  | 1771 | GTLSYEQFK  | HLA-A*11:01                                                                                                         | <b>0.24003</b> |
|  | 1772 | TLSYEQFKK  | HLA-A*11:01                                                                                                         | -0.34814       |
|  | 1786 | CTCGKQATK  | HLA-A*11:01                                                                                                         | -0.08934       |
|  | 1795 | YLVQQESPF  | HLA-B*15:02                                                                                                         | <b>0.1401</b>  |
|  | 1795 | YLVQQESPF  | HLA-B*15:21                                                                                                         | -0.29683       |
|  | 1805 | MMSAPPAQY  | HLA-B*15:02, HLA-B*15:13, HLA-B*15:21, HLA-B*35:05, HLA-B*58:01                                                     | <b>0.08593</b> |
|  | 1812 | QYELKHGTF  | HLA-A*24:02                                                                                                         | -0.06759       |
|  | 1818 | GTFTCASEY  | HLA-A*11:01, HLA-B*15:13, HLA-B*58:01                                                                               | <b>0.32333</b> |
|  | 1822 | CASEYTGNY  | HLA-A*34:01, HLA-B*15:02, HLA-B*15:13, HLA-B*15:21, HLA-B*35:05                                                     | <b>0.18319</b> |
|  | 1837 | HITSKETLY  | HLA-A*34:01                                                                                                         | <b>0.21142</b> |
|  | 1846 | CIDGALLTK  | HLA-A*11:01                                                                                                         | -0.01178       |
|  | 1864 | DVFKYKENS  | HLA-A*34:01                                                                                                         | <b>0.14035</b> |
|  | 1868 | KENSYTITI  | HLA-B*44:03                                                                                                         | -0.10212       |
|  | 1874 | TTIKPVITYK | HLA-A*11:01, HLA-A*34:01                                                                                            | <b>0.15029</b> |
|  | 1898 | YYKKNDSYF  | HLA-A*24:02, HLA-A*24:07                                                                                            | <b>0.13333</b> |
|  | 1919 | YPNASFDNF  | HLA-B*15:13, HLA-B*35:05                                                                                            | -0.27369       |
|  | 1928 | KFVCDNIKF  | HLA-A*24:02, HLA-A*24:07                                                                                            | <b>0.1358</b>  |
|  | 1970 | DYKHYPSPF  | HLA-A*24:02                                                                                                         | <b>0.31026</b> |
|  | 1983 | KLLHKPIVW  | HLA-B*58:01                                                                                                         | -0.03961       |
|  | 1999 | KATYKPNTW  | HLA-B*58:01                                                                                                         | <b>0.02826</b> |
|  | 2001 | TYKPNTWCI  | HLA-A*24:02, HLA-A*24:07                                                                                            | <b>0.5572</b>  |
|  | 2005 | NTWCIRCLW  | HLA-B*58:01                                                                                                         | -0.47377       |
|  | 2016 | KPVETSNSF  | HLA-B*15:02, HLA-B*15:13, HLA-B*15:21, HLA-B*35:05                                                                  | <b>0.05262</b> |
|  | 2019 | ETSNSFDVL  | HLA-A*34:01                                                                                                         | <b>0.17323</b> |
|  | 2020 | TSNSFDVLK  | HLA-A*11:01                                                                                                         | <b>0.19998</b> |
|  | 2050 | VVENPTIQK  | HLA-A*11:01                                                                                                         | -0.01973       |
|  | 2068 | TEVVGDIL   | HLA-B*18:01, HLA-B*38:02, HLA-B*44:03                                                                               | -0.10878       |
|  | 2075 | ILKPANNSL  | HLA-A*02:03                                                                                                         | -0.11178       |
|  | 2110 | NELSRVLGL  | HLA-B*18:01, HLA-B*38:02, HLA-B*44:03                                                                               | <b>0.05689</b> |
|  | 2111 | ELSRVLGLK  | HLA-A*34:01                                                                                                         | -0.19241       |

|  |      |           |                                                                                           |                |
|--|------|-----------|-------------------------------------------------------------------------------------------|----------------|
|  | 2126 | LAAVNSVPW | HLA-B*15:13, HLA-B*58:01                                                                  | <b>0.09719</b> |
|  | 2132 | VPWDTIANY | HLA-B*15:13, HLA-B*18:01, HLA-B*35:05                                                     | -0.08099       |
|  | 2150 | STTTNIVTR | HLA-A*33:03                                                                               | -0.28472       |
|  | 2162 | RVCTNYMPY | HLA-A*11:01                                                                               | -0.01179       |
|  | 2164 | CTNYMPYFF | HLA-B*58:01                                                                               | -0.06736       |
|  | 2166 | NYMPYFFTL | HLA-A*24:02, HLA-A*24:07, HLA-B*38:02                                                     | <b>0.18574</b> |
|  | 2167 | YMPYFFTL  | HLA-A*02:01, HLA-A*02:03, HLA-B*38:02                                                     | -0.23641       |
|  | 2168 | MPYFFTL   | HLA-B*35:05, HLA-B*38:02                                                                  | -0.037         |
|  | 2175 | LLQLCTFTR | HLA-A*33:03                                                                               | <b>0.01243</b> |
|  | 2180 | TFTRSTNSR | HLA-A*33:03                                                                               | -0.10484       |
|  | 2191 | ASMPPTIAK | HLA-A*11:01                                                                               | <b>0.00503</b> |
|  | 2195 | TTIAKNTVK | HLA-A*11:01                                                                               | <b>0.30249</b> |
|  | 2229 | IIWFLLSV  | HLA-A*02:01                                                                               | <b>0.15002</b> |
|  | 2241 | SLIYSTAAL | HLA-A*02:03, HLA-B*15:21                                                                  | -0.24334       |
|  | 2253 | MSNLGMPSY | HLA-A*11:01, HLA-A*34:01, HLA-B*15:02, HLA-B*15:13, HLA-B*15:21, HLA-B*35:05, HLA-B*58:01 | <b>0.05143</b> |
|  | 2269 | YLNSTNVTI | HLA-A*02:01, HLA-A*02:03                                                                  | -0.16914       |
|  | 2272 | STNVTIATY | HLA-A*11:01, HLA-A*34:01, HLA-B*15:02, HLA-B*15:13, HLA-B*15:21, HLA-B*58:01              | -0.00384       |
|  | 2305 | TIQITISSF | HLA-B*15:02, HLA-B*15:13, HLA-B*15:21                                                     | <b>0.0599</b>  |
|  | 2307 | QITISSFKW | HLA-B*58:01                                                                               | <b>0.20408</b> |
|  | 2318 | TAFGLVAEW | HLA-B*15:13, HLA-B*58:01                                                                  | <b>0.01392</b> |
|  | 2322 | LVAEWFLAY | HLA-A*11:01, HLA-A*34:01, HLA-B*15:02, HLA-B*15:13, HLA-B*15:21, HLA-B*18:01, HLA-B*35:05 | -0.27126       |
|  | 2324 | AEWFLAYIL | HLA-B*18:01, HLA-B*38:02, HLA-B*44:03                                                     | <b>0.23318</b> |
|  | 2327 | FLAYILFTR | HLA-A*33:03                                                                               | -0.20225       |
|  | 2328 | LAYILFTRF | HLA-B*15:13, HLA-B*58:01                                                                  | <b>0.11285</b> |
|  | 2329 | AYILFTRFF | HLA-A*24:02, HLA-A*24:07                                                                  | <b>0.28861</b> |
|  | 2331 | ILFTRFFYV | HLA-A*02:01, HLA-A*02:03                                                                  | -0.3399        |
|  | 2332 | LFTRFFYVL | HLA-A*24:02, HLA-A*24:07                                                                  | -0.3573        |
|  | 2334 | TRFFYVLGL | HLA-A*11:01, HLA-B*15:02, HLA-B*15:21, HLA-B*38:02                                        | <b>0.18696</b> |
|  | 2345 | IMQLFFSYF | HLA-A*24:02, HLA-A*24:07, HLA-B*15:02                                                     | <b>0.06167</b> |
|  | 2347 | QLFFSYFAV | HLA-A*02:01, HLA-A*02:03                                                                  | <b>0.25374</b> |
|  | 2354 | AVHFISNSW | HLA-B*58:01                                                                               | -0.14475       |
|  | 2356 | HFISNSWLM | HLA-A*24:02, HLA-A*24:07, HLA-B*58:01                                                     | <b>0.03257</b> |
|  | 2357 | FISNSWLMW | HLA-B*58:01                                                                               | -0.10306       |
|  | 2362 | WLMWLIINL | HLA-A*02:01, HLA-A*02:03                                                                  | -0.16383       |
|  | 2363 | LMWLIINLV | HLA-A*02:01                                                                               | <b>0.02119</b> |
|  | 2371 | VQMAPISAM | HLA-B*15:02, HLA-B*15:21                                                                  | <b>0.04528</b> |
|  | 2372 | QMAPISAMV | HLA-A*02:01, HLA-A*02:03                                                                  | <b>0.14228</b> |

|  |      |            |                                                                                                        |                |
|--|------|------------|--------------------------------------------------------------------------------------------------------|----------------|
|  | 2381 | RMYIFFASF  | HLA-A*24:02, HLA-A*24:07, HLA-B*15:02, HLA-B*15:13, HLA-B*15:21, HLA-B*35:05, HLA-B*38:02, HLA-B*58:01 | <b>0.08761</b> |
|  | 2382 | MYIFFASFY  | HLA-A*24:02                                                                                            | <b>0.06244</b> |
|  | 2383 | YIFFASFYY  | HLA-A*11:01, HLA-A*34:01, HLA-B*15:02, HLA-B*15:13, HLA-B*15:21, HLA-B*18:01, HLA-B*35:05              | <b>0.3343</b>  |
|  | 2384 | IFFASFYYV  | HLA-A*24:07, HLA-A*33:03                                                                               | <b>0.11769</b> |
|  | 2385 | FFASFYYVW  | HLA-A*24:02, HLA-A*24:07                                                                               | <b>0.08328</b> |
|  | 2391 | YVWKSYPHV  | HLA-A*02:01                                                                                            | -0.15127       |
|  | 2405 | SSTCMMCCK  | HLA-A*11:01                                                                                            | -0.07566       |
|  | 2406 | STCMMCCKR  | HLA-A*33:03                                                                                            | <b>0.12576</b> |
|  | 2408 | CMMCCKRNR  | HLA-A*33:03                                                                                            | <b>0.02228</b> |
|  | 2441 | KGFCCKLHNW | HLA-B*58:01                                                                                            | -0.14675       |
|  | 2455 | DTFCAGSTF  | HLA-A*34:01, HLA-B*15:02, HLA-B*15:13, HLA-B*15:21                                                     | -0.11221       |
|  | 2466 | DEVARDLSL  | HLA-B*18:01, HLA-B*38:02                                                                               | <b>0.03366</b> |
|  | 2468 | VARDLSLQF  | HLA-B*15:02, HLA-B*15:13, HLA-B*35:05, HLA-B*58:01                                                     | -0.02137       |
|  | 2487 | SYIVDSVTV  | HLA-A*24:07                                                                                            | -0.48075       |
|  | 2488 | YIVDSVTVK  | HLA-A*34:01                                                                                            | <b>0.02392</b> |
|  | 2498 | GSIHLYFDK  | HLA-A*11:01                                                                                            | <b>0.0636</b>  |
|  | 2512 | YERHLSLHF  | HLA-B*18:01, HLA-B*44:03                                                                               | -0.13656       |
|  | 2518 | SHFVNLDNL  | HLA-B*38:02                                                                                            | <b>0.19909</b> |
|  | 2519 | HFNLDNLR   | HLA-A*33:03                                                                                            | -0.04273       |
|  | 2551 | SSAKSASVY  | HLA-A*34:01, HLA-B*15:02, HLA-B*15:13, HLA-B*15:21                                                     | <b>0.11506</b> |
|  | 2552 | SAKSASVYY  | HLA-B*15:02, HLA-B*15:13, HLA-B*15:21                                                                  | -0.0981        |
|  | 2568 | ILLDQALV   | HLA-A*02:01                                                                                            | -0.07971       |
|  | 2589 | MFDAYVNTF  | HLA-A*24:02, HLA-A*24:07, HLA-B*35:05                                                                  | <b>0.11817</b> |
|  | 2593 | YVNTFSSTF  | HLA-A*34:01, HLA-B*15:02, HLA-B*15:13, HLA-B*15:21, HLA-B*35:05                                        | <b>0.22019</b> |
|  | 2595 | NTFSSTFNV  | HLA-A*34:01                                                                                            | -0.19434       |
|  | 2597 | FSSTFNVP   | HLA-B*15:21, HLA-B*35:05                                                                               | <b>0.08367</b> |
|  | 2599 | STFNVPMEK  | HLA-A*11:01, HLA-A*33:03, HLA-A*34:01                                                                  | <b>0.09901</b> |
|  | 2607 | KLKTLVATA  | HLA-A*02:03                                                                                            | -0.08019       |
|  | 2613 | ATAEAEELAK | HLA-A*11:01                                                                                            | <b>0.0548</b>  |
|  | 2617 | AELAKNVSL  | HLA-B*44:03                                                                                            | -0.03902       |
|  | 2628 | VLSTFISAA  | HLA-A*02:03                                                                                            | <b>0.29793</b> |
|  | 2629 | LSTFISAAR  | HLA-A*33:03, HLA-A*34:01                                                                               | -0.21317       |
|  | 2646 | ETKDVVECL  | HLA-A*34:01                                                                                            | -0.08793       |
|  | 2671 | NYMLTYNKKV | HLA-A*24:02, HLA-A*24:07                                                                               | <b>0.1614</b>  |
|  | 2704 | KSHNIALIW  | HLA-B*58:01                                                                                            | <b>0.09873</b> |
|  | 2718 | MSLSEQLRK  | HLA-A*11:01                                                                                            | -0.2627        |
|  | 2748 | QVVNVVTTK  | HLA-A*11:01, HLA-A*34:01                                                                               | <b>0.236</b>   |

|  |      |           |                                                                 |                |
|--|------|-----------|-----------------------------------------------------------------|----------------|
|  | 2771 | QLIKVTLVF | HLA-B*15:02, HLA-B*15:13, HLA-B*15:21                           | <b>0.08004</b> |
|  | 2778 | VFLFVAAIF | HLA-A*24:02, HLA-A*24:07                                        | <b>0.26401</b> |
|  | 2779 | FLFVAAIFY | HLA-B*15:02, HLA-B*15:21                                        | -0.21168       |
|  | 2781 | FVAAIFYLI | HLA-A*02:01                                                     | <b>0.09674</b> |
|  | 2784 | AIFYLITPV | HLA-A*02:01, HLA-A*02:03, HLA-A*34:01                           | <b>0.05282</b> |
|  | 2786 | FYLITPVHV | HLA-A*24:02, HLA-A*24:07                                        | -0.05505       |
|  | 2787 | YLITPVHVM | HLA-A*02:01, HLA-A*02:03, HLA-B*15:02, HLA-B*15:21              | <b>0.28124</b> |
|  | 2789 | ITPVHVMSK | HLA-A*11:01                                                     | <b>0.43221</b> |
|  | 2793 | HVMSKHTDF | HLA-B*15:02, HLA-B*15:21                                        | -0.07818       |
|  | 2797 | KHTDFSSEI | HLA-B*38:02                                                     | <b>0.1586</b>  |
|  | 2801 | FSSEIIGYK | HLA-A*11:01, HLA-A*34:01                                        | <b>0.15656</b> |
|  | 2821 | STDTCFANK | HLA-A*11:01                                                     | <b>0.14212</b> |
|  | 2832 | DFDTWFSQR | HLA-A*33:03                                                     | -0.13194       |
|  | 2875 | TTNGDFLHF | HLA-B*15:13, HLA-B*58:01                                        | -0.07941       |
|  | 2883 | FLPRVFSAV | HLA-A*02:01, HLA-A*02:03                                        | -0.15483       |
|  | 2888 | FSAVGNICY | HLA-B*15:02, HLA-B*15:13, HLA-B*15:21                           | -0.08512       |
|  | 2896 | YTPSKLIEY | HLA-A*34:01                                                     | -0.13343       |
|  | 2900 | KLIEYDFA  | HLA-A*02:01                                                     | -0.11782       |
|  | 2914 | LAAECTIFK | HLA-A*11:01                                                     | -0.28981       |
|  | 2936 | NVLEGSVAY | HLA-A*34:01, HLA-B*15:02, HLA-B*15:21, HLA-B*18:01, HLA-B*35:05 | -0.1059        |
|  | 2946 | SLRPDTRYV | HLA-A*02:03                                                     | <b>0.0827</b>  |
|  | 2959 | SIIQFPNTY | HLA-A*34:01, HLA-B*15:02, HLA-B*15:21                           | <b>0.24538</b> |
|  | 2970 | GSRVVVTF  | HLA-B*15:13, HLA-B*58:01                                        | <b>0.22152</b> |
|  | 2976 | TTFDSEYCR | HLA-A*11:01, HLA-A*33:03, HLA-A*34:01                           | <b>0.15864</b> |
|  | 3003 | WVLNNDYYR | HLA-A*33:03                                                     | -0.21208       |
|  | 3009 | YYRSLPGVF | HLA-A*24:02, HLA-A*24:07                                        | <b>0.23882</b> |
|  | 3012 | SLPGVFCGV | HLA-A*02:01, HLA-A*02:03                                        | <b>0.33033</b> |
|  | 3015 | GVFCGVDAV | HLA-A*02:03                                                     | <b>0.00599</b> |
|  | 3025 | LLTNMFTPL | HLA-A*02:01, HLA-A*02:03                                        | <b>0.00758</b> |
|  | 3029 | MFTPLIQPI | HLA-A*24:02, HLA-A*24:07                                        | <b>0.0579</b>  |
|  | 3053 | AIVVTCLAY | HLA-B*15:02, HLA-B*15:21                                        | -0.17322       |
|  | 3059 | LAYYFMRFR | HLA-A*33:03                                                     | -0.30428       |
|  | 3060 | AYYFMRFR  | HLA-A*33:03                                                     | -0.0587        |
|  | 3071 | GEYSHVAF  | HLA-B*15:02, HLA-B*18:01, HLA-B*38:02, HLA-B*44:03              | -0.12439       |
|  | 3074 | SHVAFNTL  | HLA-B*38:02                                                     | <b>0.24313</b> |
|  | 3075 | HVAFNTLL  | HLA-A*34:01                                                     | -0.26543       |
|  | 3076 | VVAFNTLLF | HLA-A*24:07                                                     | <b>0.27821</b> |
|  | 3082 | LLFLMSFTV | HLA-A*02:01, HLA-A*02:03                                        | -0.07943       |
|  | 3085 | LMSFTVLCL | HLA-A*02:01                                                     | <b>0.13402</b> |



|  |      |            |                                                                 |                |
|--|------|------------|-----------------------------------------------------------------|----------------|
|  | 3088 | FTVLCLTPV  | HLA-A*02:01, HLA-A*02:03, HLA-A*34:01                           | -0.34574       |
|  | 3089 | TVLCLTPVY  | HLA-B*15:21, HLA-B*35:05                                        | -0.13812       |
|  | 3099 | FLPGVYSVI  | HLA-A*02:01, HLA-A*02:03                                        | -0.33779       |
|  | 3100 | LPGVYSVIY  | HLA-B*35:05                                                     | <b>0.29512</b> |
|  | 3102 | GVYSVIYLY  | HLA-A*11:01, HLA-A*34:01, HLA-B*58:01                           | <b>0.05586</b> |
|  | 3103 | VYSVIYLYL  | HLA-A*24:02, HLA-A*24:07                                        | <b>0.02998</b> |
|  | 3105 | SVIYLYLTF  | HLA-A*24:02, HLA-A*24:07, HLA-B*15:02, HLA-B*15:13              | <b>0.13713</b> |
|  | 3107 | IYLYLTFYL  | HLA-A*24:02, HLA-A*24:07                                        | -0.15716       |
|  | 3113 | FYLTNDVSF  | HLA-A*24:02, HLA-A*24:07                                        | -0.21463       |
|  | 3114 | YLTNDVSFL  | HLA-A*02:01, HLA-A*02:03                                        | -0.26262       |
|  | 3119 | VSFLAHIQW  | HLA-B*58:01                                                     | <b>0.08425</b> |
|  | 3121 | FLAHIQWMV  | HLA-A*02:01, HLA-A*02:03                                        | <b>0.2064</b>  |
|  | 3129 | VMFTPLVPF  | HLA-B*15:02, HLA-B*15:13, HLA-B*15:21                           | <b>0.10163</b> |
|  | 3135 | VPFWITIAY  | HLA-B*15:02, HLA-B*15:13, HLA-B*15:21, HLA-B*18:01, HLA-B*35:05 | -0.05933       |
|  | 3137 | FWITIAYII  | HLA-A*24:02, HLA-A*24:07                                        | <b>0.08626</b> |
|  | 3146 | CISTKHFYW  | HLA-B*58:01                                                     | <b>0.30988</b> |
|  | 3147 | ISTKHFYWF  | HLA-A*24:02, HLA-A*24:07, HLA-B*58:01                           | <b>0.14443</b> |
|  | 3148 | STKHFYWFF  | HLA-A*24:02, HLA-A*24:07                                        | <b>0.00629</b> |
|  | 3151 | HFYWFFSNY  | HLA-A*33:03, HLA-A*34:01, HLA-B*18:01                           | -0.18993       |
|  | 3152 | FYWFFSNYL  | HLA-A*24:02, HLA-A*24:07                                        | -0.05002       |
|  | 3153 | YWFFSNYLK  | HLA-A*11:01, HLA-A*33:03                                        | -0.0549        |
|  | 3154 | WFFSNYLKR  | HLA-A*33:03                                                     | <b>0.34464</b> |
|  | 3158 | NYLKRRVVF  | HLA-A*24:02, HLA-A*24:07                                        | <b>0.2888</b>  |
|  | 3163 | RVVFNGVSF  | HLA-B*15:02, HLA-B*15:21                                        | -0.17841       |
|  | 3174 | FEEAALCTF  | HLA-B*18:01, HLA-B*44:03                                        | -0.01434       |
|  | 3178 | ALCTFLLNK  | HLA-A*11:01                                                     | <b>0.24386</b> |
|  | 3182 | FLLNKEMYL  | HLA-A*02:01, HLA-A*02:03                                        | <b>0.09072</b> |
|  | 3183 | LLNKEMYLK  | HLA-A*11:01                                                     | -0.25542       |
|  | 3198 | LPLTQYNRY  | HLA-B*35:05                                                     | -0.2965        |
|  | 3201 | TQYNRYLAL  | HLA-B*38:02                                                     | <b>0.05676</b> |
|  | 3205 | RYLALYNKY  | HLA-A*24:02, HLA-A*24:07                                        | <b>0.26255</b> |
|  | 3207 | LALYNKYKY  | HLA-B*35:05                                                     | -0.02843       |
|  | 3218 | GAMDTTSYR  | HLA-A*11:01, HLA-A*33:03, HLA-A*34:01                           | <b>0.24273</b> |
|  | 3225 | YREAACCHL  | HLA-B*38:02                                                     | <b>0.07994</b> |
|  | 3232 | HLAKALNDF  | HLA-B*15:02, HLA-B*15:21                                        | <b>0.0999</b>  |
|  | 3248 | LYQPPQTSI  | HLA-A*24:02, HLA-A*24:07                                        | <b>0.30368</b> |
|  | 3259 | AVLQSGFRK  | HLA-A*11:01                                                     | <b>0.00581</b> |
|  | 3267 | KMAFP SGKV | HLA-A*02:03                                                     | -0.05604       |
|  | 3285 | GTTTLNGLW  | HLA-B*58:01                                                     | <b>0.06748</b> |

|  |      |            |                                                                                 |                |
|--|------|------------|---------------------------------------------------------------------------------|----------------|
|  | 3308 | SEDMLNPNY  | HLA-B*18:01, HLA-B*44:03                                                        | <b>0.24122</b> |
|  | 3311 | MLNPNYEDL  | HLA-A*02:03                                                                     | <b>0.19857</b> |
|  | 3342 | HSMQNCVLK  | HLA-A*11:01                                                                     | <b>0.10269</b> |
|  | 3359 | KTPKYKFVR  | HLA-A*33:03                                                                     | <b>0.04133</b> |
|  | 3372 | QTFSVLACY  | HLA-A*11:01, HLA-A*34:01, HLA-B*15:02, HLA-B*15:13,<br>HLA-B*15:21, HLA-B*58:01 | -0.06765       |
|  | 3390 | CAMRPNFTI  | HLA-B*58:01                                                                     | <b>0.19601</b> |
|  | 3402 | FLNGSCGSV  | HLA-A*02:01, HLA-A*02:03                                                        | -0.23637       |
|  | 3419 | VSFCYMHMHM | HLA-B*58:01                                                                     | <b>0.10982</b> |
|  | 3439 | LEGNFYGPF  | HLA-B*18:01, HLA-B*44:03                                                        | -0.23124       |
|  | 3442 | NFYGPFVDR  | HLA-A*33:03                                                                     | -0.07718       |
|  | 3462 | ITVNVLAWL  | HLA-B*58:01                                                                     | <b>0.16015</b> |
|  | 3463 | TVNVLAWLY  | HLA-A*11:01                                                                     | <b>0.25621</b> |
|  | 3466 | VLAWLYAAV  | HLA-A*02:01, HLA-A*02:03                                                        | <b>0.23304</b> |
|  | 3472 | AAVINGDRW  | HLA-B*58:01                                                                     | <b>0.05863</b> |
|  | 3481 | FLNRFTTTL  | HLA-A*02:01, HLA-A*02:03                                                        | -0.05892       |
|  | 3507 | DHVDILGPL  | HLA-B*38:02                                                                     | <b>0.3346</b>  |
|  | 3523 | VLDMCASLK  | HLA-A*11:01                                                                     | -0.32096       |
|  | 3541 | RTILGSALL  | HLA-B*58:01                                                                     | <b>0.45285</b> |
|  | 3548 | LLEDEFTPF  | HLA-B*15:02, HLA-B*15:21                                                        | <b>0.10642</b> |
|  | 3551 | DEFTPFDVV  | HLA-B*18:01                                                                     | -0.14748       |
|  | 3552 | EFTPFDVVR  | HLA-A*33:03                                                                     | -0.26551       |
|  | 3564 | GVTFSQSAVK | HLA-A*11:01                                                                     | <b>0.2541</b>  |
|  | 3565 | VTFQSAVKR  | HLA-A*33:03                                                                     | -0.13471       |
|  | 3573 | RTIKGTHHW  | HLA-A*24:07, HLA-B*15:13, HLA-B*58:01                                           | <b>0.11065</b> |
|  | 3578 | THHWLLTI   | HLA-B*38:02                                                                     | -0.41802       |
|  | 3579 | HHWLLTIL   | HLA-B*38:02                                                                     | <b>0.15845</b> |
|  | 3582 | LLLTILTSL  | HLA-A*02:01, HLA-A*02:03                                                        | <b>0.21385</b> |
|  | 3586 | ILTSLLVLV  | HLA-A*02:01, HLA-A*02:03                                                        | -0.05472       |
|  | 3591 | LVLVQSTQW  | HLA-B*58:01                                                                     | -0.0808        |
|  | 3595 | QSTQWSLFF  | HLA-B*58:01                                                                     | -0.2325        |
|  | 3596 | STQWSLFFF  | HLA-A*24:07                                                                     | -0.02691       |
|  | 3597 | TQWSLFFFL  | HLA-A*02:01, HLA-B*38:02                                                        | <b>0.0593</b>  |
|  | 3605 | LYENAFLPF  | HLA-A*24:02, HLA-A*24:07                                                        | -0.27148       |
|  | 3618 | IAMSAFAMM  | HLA-B*35:05                                                                     | <b>0.02816</b> |
|  | 3620 | MSAFAMMFV  | HLA-A*34:01                                                                     | <b>0.09905</b> |
|  | 3621 | SAFAMMFVK  | HLA-A*11:01                                                                     | <b>0.01168</b> |
|  | 3638 | FLLPSLATV  | HLA-A*02:01, HLA-A*02:03                                                        | -0.08907       |
|  | 3640 | LPSLATVAY  | HLA-B*15:02, HLA-B*15:21, HLA-B*18:01, HLA-B*35:05                              | <b>0.35609</b> |
|  | 3645 | TVAYFNMVY  | HLA-A*11:01, HLA-A*34:01, HLA-B*15:02, HLA-B*15:21,                             | -0.01723       |

|  |      |            |                                                                                              |                |
|--|------|------------|----------------------------------------------------------------------------------------------|----------------|
|  |      |            | HLA-B*35:05                                                                                  |                |
|  | 3652 | VYMPASWVM  | HLA-A*24:02, HLA-A*24:07                                                                     | -0.25896       |
|  | 3654 | MPASWVMRI  | HLA-B*35:05                                                                                  | -0.39659       |
|  | 3657 | SWVMRIMTW  | HLA-A*24:02, HLA-A*24:07                                                                     | -0.1867        |
|  | 3661 | RIMTWLDMV  | HLA-A*02:01, HLA-A*02:03                                                                     | -0.12088       |
|  | 3671 | TSLSGFKLK  | HLA-A*11:01                                                                                  | <b>0.07442</b> |
|  | 3677 | KLKDCVMYA  | HLA-A*02:03                                                                                  | -0.1898        |
|  | 3683 | MYASAVVLL  | HLA-A*24:02, HLA-A*24:07                                                                     | <b>0.07782</b> |
|  | 3684 | YASAVVLLI  | HLA-B*58:01                                                                                  | -0.12397       |
|  | 3692 | ILMTARTVY  | HLA-B*15:02, HLA-B*15:21, HLA-B*35:05                                                        | -0.05113       |
|  | 3709 | TLMNVLTIV  | HLA-A*02:01, HLA-A*02:03                                                                     | -0.07023       |
|  | 3710 | LMNVLTIVY  | HLA-B*15:02, HLA-B*15:13, HLA-B*15:21, HLA-B*35:05<br>HLA-B*58:01                            | -0.01717       |
|  | 3731 | SMWALIISV  | HLA-A*02:01, HLA-A*02:03, HLA-B*38:02                                                        | -0.43574       |
|  | 3735 | LIISVTSNY  | HLA-A*34:01, HLA-B*15:02, HLA-B*15:13, HLA-B*15:21                                           | <b>0.2513</b>  |
|  | 3752 | FLARGIVFM  | HLA-A*02:01, HLA-A*02:03                                                                     | -0.13454       |
|  | 3762 | VEYCPIFFI  | HLA-B*44:03                                                                                  | -0.0765        |
|  | 3774 | TLQCIMLVY  | HLA-B*15:21                                                                                  | -0.06755       |
|  | 3779 | MLVYCFLGY  | HLA-A*34:01, HLA-B*15:02, HLA-B*15:21, HLA-B*35:05                                           | -0.16192       |
|  | 3791 | CYFGLFCLL  | HLA-A*24:02, HLA-A*24:07                                                                     | -0.16073       |
|  | 3811 | DYLVSTQEF  | HLA-A*24:02                                                                                  | -0.15508       |
|  | 3819 | FRYMNSQGL  | HLA-B*38:02                                                                                  | -0.25158       |
|  | 3838 | KLNIKLLGV  | HLA-A*02:01, HLA-A*02:03                                                                     | -0.38114       |
|  | 3870 | VLLSVLQQL  | HLA-A*02:01                                                                                  | <b>0.007</b>   |
|  | 3879 | RVESSSKLW  | HLA-B*58:01                                                                                  | -0.4958        |
|  | 3885 | KLWAQCQVL  | HLA-A*02:01, HLA-A*02:03                                                                     | <b>0.1065</b>  |
|  | 3898 | LLAKDTTEA  | HLA-A*02:03                                                                                  | -0.19245       |
|  | 3899 | LAKDTTEAF  | HLA-B*15:02, HLA-B*15:13, HLA-B*15:21, HLA-B*35:05                                           | -0.02118       |
|  | 3905 | EAFEKMOVSL | HLA-A*34:01                                                                                  | <b>0.15781</b> |
|  | 3909 | KMVSLLSVL  | HLA-A*02:01, HLA-A*02:03                                                                     | -0.04845       |
|  | 3912 | SLLSVLLSM  | HLA-A*02:01                                                                                  | <b>0.24061</b> |
|  | 3945 | SEFSSLPSY  | HLA-B*15:02, HLA-B*15:13, HLA-B*15:21, HLA-B*18:01,<br>HLA-B*44:03                           | <b>0.12602</b> |
|  | 3948 | SSLPSYAAF  | HLA-A*24:02, HLA-A*24:07, HLA-B*15:02, HLA-B*15:13,<br>HLA-B*15:21, HLA-B*35:05, HLA-B*58:01 | -0.22896       |
|  | 3982 | SLNVAKSEF  | HLA-B*15:02, HLA-B*15:21                                                                     | -0.07037       |
|  | 3988 | SEFDRDAAM  | HLA-B*18:01, HLA-B*38:02, HLA-B*44:03                                                        | -0.12288       |
|  | 4000 | LEKMADQAM  | HLA-B*18:01                                                                                  | -0.0765        |
|  | 4003 | MADQAMTQM  | HLA-B*35:05                                                                                  | -0.07746       |
|  | 4008 | MTQMYKQAR  | HLA-A*33:03                                                                                  | <b>0.1801</b>  |

|  |      |           |                                                                                 |                |
|--|------|-----------|---------------------------------------------------------------------------------|----------------|
|  | 4027 | AMQTMLFTM | HLA-A*02:01                                                                     | <b>0.20414</b> |
|  | 4028 | MQTMLFTML | HLA-B*38:02                                                                     | -0.21401       |
|  | 4029 | QTMLFTMLR | HLA-A*11:01, HLA-A*33:03<br>HLA-A*34:01                                         | -0.37437       |
|  | 4030 | TMLFTMLRK | HLA-A*11:01                                                                     | <b>0.02386</b> |
|  | 4031 | MLFTMLRKL | HLA-A*02:01, HLA-A*02:03                                                        | -0.19828       |
|  | 4043 | ALNNIINNA | HLA-A*02:03                                                                     | -0.23625       |
|  | 4071 | VVIPDYNTY | HLA-B*15:02, HLA-B*15:13, HLA-B*15:21, HLA-B*35:05                              | -0.01197       |
|  | 4072 | VIPDYNTYK | HLA-A*11:01                                                                     | <b>0.16112</b> |
|  | 4086 | TTFTYASAL | HLA-A*34:01                                                                     | <b>0.03347</b> |
|  | 4087 | TFTYASALW | HLA-A*24:02, HLA-A*24:07                                                        | <b>0.14013</b> |
|  | 4089 | TYASALWEI | HLA-A*24:02, HLA-A*24:07                                                        | <b>0.06014</b> |
|  | 4093 | ALWEIQQVV | HLA-A*02:01, HLA-A*02:03                                                        | -0.04249       |
|  | 4138 | LQNNELSPV | HLA-A*02:03                                                                     | -0.2515        |
|  | 4167 | ALAYYNTTK | HLA-A*11:01                                                                     | -0.15801       |
|  | 4182 | ALLSDLQDL | HLA-A*02:01                                                                     | <b>0.25478</b> |
|  | 4184 | LSDLQDLKW | HLA-B*58:01                                                                     | <b>0.14399</b> |
|  | 4186 | DLQDLKWAR | HLA-A*33:03                                                                     | <b>0.19412</b> |
|  | 4189 | DLKWARFPK | HLA-A*33:03                                                                     | <b>0.1602</b>  |
|  | 4197 | KSDGTGTIY | HLA-B*58:01                                                                     | <b>0.03212</b> |
|  | 4206 | TELEPPCRF | HLA-B*18:01, HLA-B*44:03                                                        | <b>0.17636</b> |
|  | 4228 | YFIKGLNNL | HLA-A*24:02, HLA-A*24:07                                                        | -0.06252       |
|  | 4260 | PANSTVLSF | HLA-B*15:13                                                                     | -0.1653        |
|  | 4263 | STVLSFAF  | HLA-B*15:02, HLA-B*15:13, HLA-B*15:21, HLA-B*35:05,<br>HLA-B*58:01              | <b>0.15992</b> |
|  | 4265 | VLSFCAFAV | HLA-A*02:01                                                                     | -0.19793       |
|  | 4271 | FAVDAAKAY | HLA-A*34:01, HLA-B*15:02, HLA-B*15:13, HLA-B*15:21,<br>HLA-B*18:01, HLA-B*35:05 | <b>0.03414</b> |
|  | 4272 | AVDAAKAYK | HLA-A*11:01                                                                     | -0.34838       |
|  | 4282 | YLASGGQPI | HLA-A*02:01, HLA-A*02:03                                                        | <b>0.03976</b> |
|  | 4363 | TLKNTVCTV | HLA-A*02:03                                                                     | <b>0.21633</b> |
|  | 4401 | RVCVSAAR  | HLA-A*33:03                                                                     | <b>0.28943</b> |
|  | 4424 | RAFDIYNDK | HLA-A*11:01                                                                     | -0.12238       |
|  | 4428 | IYNDKVAGF | HLA-A*24:02, HLA-A*24:07                                                        | <b>0.30199</b> |
|  | 4455 | NLIDSYFVV | HLA-A*02:01, HLA-A*02:03                                                        | -0.19751       |
|  | 4456 | LIDSYFVVK | HLA-A*11:01                                                                     | <b>0.11288</b> |
|  | 4460 | YFVVKRHTF | HLA-A*24:02, HLA-A*24:07                                                        | -0.0823        |
|  | 4472 | QHEETIYNL | HLA-B*38:02                                                                     | -0.19232       |
|  | 4473 | HEETIYNLL | HLA-B*18:01, HLA-B*38:02                                                        | -0.09417       |
|  | 4479 | NLLKDCPAV | HLA-A*02:01                                                                     | -0.26518       |

|  |      |           |                                                                 |                |
|--|------|-----------|-----------------------------------------------------------------|----------------|
|  | 4484 | CPAVAKHDF | HLA-B*35:05                                                     | <b>0.28136</b> |
|  | 4486 | AVAKHDFFK | HLA-A*11:01                                                     | <b>0.01505</b> |
|  | 4487 | VAKHDFFKF | HLA-A*24:02, HLA-A*24:07, HLA-B*15:13                           | -0.03358       |
|  | 4501 | MVPHISRQR | HLA-A*33:03                                                     | -0.09719       |
|  | 4513 | YTMADLVYA | HLA-A*02:01                                                     | -0.0723        |
|  | 4514 | TMADLVYAL | HLA-A*02:01                                                     | -0.41653       |
|  | 4514 | TMADLVYAL | HLA-A*02:03, HLA-A*34:01, HLA-B*38:02                           | <b>0.14139</b> |
|  | 4515 | MADLVYALR | HLA-A*33:03                                                     | -0.10693       |
|  | 4532 | TLKEILVTY | HLA-B*15:02, HLA-B*15:21                                        | <b>0.19394</b> |
|  | 4557 | VENPDILRV | HLA-B*44:03                                                     | -0.21888       |
|  | 4580 | TVQFCDAMR | HLA-A*33:03                                                     | <b>0.37218</b> |
|  | 4627 | SYSSLMPI  | HLA-A*24:02, HLA-A*24:07                                        | <b>0.10786</b> |
|  | 4628 | YSSLMPIL  | HLA-A*24:02                                                     | <b>0.17082</b> |
|  | 4644 | AESHVDTDL | HLA-B*44:03                                                     | -0.0358        |
|  | 4656 | YIKWDLKY  | HLA-B*15:02, HLA-B*15:21                                        | <b>0.07068</b> |
|  | 4672 | KLFDYFKY  | HLA-A*11:01, HLA-B*15:02, HLA-B*15:21                           | <b>0.01651</b> |
|  | 4677 | YFKYWDQTY | HLA-B*15:02                                                     | -0.127         |
|  | 4685 | YHPNCVNCL | HLA-B*38:02                                                     | <b>0.10344</b> |
|  | 4698 | ILHCANFNV | HLA-A*02:01, HLA-A*02:03                                        | <b>0.01828</b> |
|  | 4699 | LHCANFNVL | HLA-B*38:02                                                     | -0.36257       |
|  | 4712 | FPPTSFGPL | HLA-B*35:05                                                     | -0.10238       |
|  | 4715 | TSFGPLVRK | HLA-A*11:01                                                     | -0.38391       |
|  | 4723 | KIFVDGVPF | HLA-B*15:02                                                     | <b>0.29328</b> |
|  | 4725 | FVDGVPFVV | HLA-A*02:01                                                     | -0.26109       |
|  | 4729 | VPFVVSTGY | HLA-B*15:02, HLA-B*15:21, HLA-B*35:05                           | <b>0.23144</b> |
|  | 4731 | FVVSTGYHF | HLA-B*15:02, HLA-B*15:13, HLA-B*15:21, HLA-B*35:05              | -0.05806       |
|  | 4732 | VVSTGYHFR | HLA-A*11:01, HLA-A*33:03                                        | <b>0.03204</b> |
|  | 4751 | NLHSSRLSF | HLA-B*15:02, HLA-B*15:21                                        | -0.06415       |
|  | 4757 | LSFKELLY  | HLA-B*15:02, HLA-B*15:13, HLA-B*15:21, HLA-B*35:05, HLA-B*58:01 | <b>0.08254</b> |
|  | 4763 | LVYAADPAM | HLA-B*15:02, HLA-B*15:21, HLA-B*35:05                           | -0.04305       |
|  | 4771 | MHAASGNLL | HLA-B*38:02                                                     | -0.1429        |
|  | 4788 | SVAALTNNV | HLA-A*34:01                                                     | -0.63928       |
|  | 4790 | AALTNNVAF | HLA-B*35:05                                                     | <b>0.09498</b> |
|  | 4800 | TVKPGNFNK | HLA-A*11:01, HLA-A*33:03                                        | <b>0.0318</b>  |
|  | 4805 | NFNKDFYDF | HLA-A*24:02                                                     | -0.10997       |
|  | 4809 | DFYDFAVSK | HLA-A*33:03                                                     | -0.13601       |
|  | 4813 | FAVSKGFFK | HLA-A*11:01                                                     | <b>0.09674</b> |
|  | 4840 | AISDYDYR  | HLA-A*11:01, HLA-A*33:03                                        | -0.32142       |
|  | 4846 | YYRYNLPTM | HLA-A*24:02                                                     | -0.25007       |

|  |      |           |                                                                              |                |
|--|------|-----------|------------------------------------------------------------------------------|----------------|
|  | 4858 | RQLLFVVEV | HLA-A*02:01                                                                  | -0.19953       |
|  | 4862 | FVVEVVDKY | HLA-A*34:01, HLA-B*15:21                                                     | <b>0.18748</b> |
|  | 4891 | KSAGFPFNK | HLA-A*11:01                                                                  | -0.40603       |
|  | 4892 | SAGFPFNKW | HLA-B*58:01                                                                  | <b>0.02304</b> |
|  | 4904 | RLYYDSMSY | HLA-A*11:01, HLA-B*15:02, HLA-B*15:13, HLA-B*15:21, HLA-B*35:05              | <b>0.06159</b> |
|  | 4913 | EDQDALFAY | HLA-B*18:01                                                                  | -0.25565       |
|  | 4916 | DALFAYTKR | HLA-A*33:03                                                                  | <b>0.25237</b> |
|  | 4925 | NVIPTITQM | HLA-A*34:01                                                                  | <b>0.07774</b> |
|  | 4952 | SICSTMTNR | HLA-A*33:03                                                                  | <b>0.22046</b> |
|  | 4957 | MTNRQFHQK | HLA-A*11:01, HLA-A*33:03                                                     | -0.28249       |
|  | 4960 | RQFHQKLLK | HLA-A*11:01                                                                  | -0.11496       |
|  | 4966 | LLKSIAATR | HLA-A*33:03                                                                  | <b>0.04742</b> |
|  | 4976 | ATVVIGTSK | HLA-A*11:01                                                                  | -0.17157       |
|  | 4977 | TVVIGTSKF | HLA-B*15:13                                                                  | <b>0.16115</b> |
|  | 4981 | GTSKFYGGW | HLA-B*58:01                                                                  | <b>0.19545</b> |
|  | 4984 | KFYGGWHNM | HLA-A*24:02, HLA-A*24:07                                                     | <b>0.07155</b> |
|  | 4985 | FYGGWHNML | HLA-A*24:02, HLA-A*24:07                                                     | -0.0292        |
|  | 4992 | MLKTVYSDV | HLA-A*02:03                                                                  | -0.24633       |
|  | 5000 | VENPHLMGW | HLA-B*44:03                                                                  | -0.20658       |
|  | 5002 | NPHLMGWDY | HLA-B*35:05                                                                  | <b>0.1552</b>  |
|  | 5004 | HLMGWDYPK | HLA-A*11:01, HLA-A*33:03, HLA-A*34:01                                        | <b>0.1053</b>  |
|  | 5015 | RAMPNMLRI | HLA-A*24:07, HLA-B*58:01                                                     | <b>0.19848</b> |
|  | 5021 | LRIMASLVL | HLA-B*38:02                                                                  | -0.1188        |
|  | 5023 | IMASLVLAR | HLA-A*33:03                                                                  | -0.26388       |
|  | 5024 | MASLVLARK | HLA-A*11:01, HLA-A*33:03, HLA-A*34:01                                        | <b>0.24141</b> |
|  | 5034 | TTCCSLSHR | HLA-A*33:03                                                                  | <b>0.07388</b> |
|  | 5037 | CSLSHRFYR | HLA-A*11:01, HLA-A*33:03                                                     | -0.44407       |
|  | 5045 | RLANECAQV | HLA-A*02:01, HLA-A*02:03                                                     | <b>0.16358</b> |
|  | 5057 | MVMCGGSLY | HLA-A*11:01, HLA-A*34:01, HLA-B*15:02, HLA-B*15:13, HLA-B*15:21, HLA-B*35:05 | -0.12346       |
|  | 5058 | VMCGGSLYV | HLA-A*02:01, HLA-A*02:03                                                     | <b>0.00065</b> |
|  | 5072 | SSGDATTAY | HLA-B*15:02, HLA-B*15:21                                                     | -0.42561       |
|  | 5077 | TTAYANSVF | HLA-B*15:13, HLA-B*15:21                                                     | -0.54507       |
|  | 5079 | AYANSVFNI | HLA-A*24:02, HLA-A*24:07                                                     | <b>0.1332</b>  |
|  | 5083 | SVFNICQAV | HLA-A*02:03, HLA-A*34:01                                                     | -0.02845       |
|  | 5131 | DFVNEFYAY | HLA-B*18:01                                                                  | <b>0.32841</b> |
|  | 5132 | FVNEFYAYL | HLA-A*02:01, HLA-A*02:03, HLA-A*34:01                                        | <b>0.25822</b> |
|  | 5138 | AYLRKHFSM | HLA-A*24:02, HLA-A*24:07                                                     | <b>0.18095</b> |
|  | 5139 | YLRKHFSMM | HLA-A*02:03, HLA-A*34:01, HLA-B*15:02, HLA-B*15:21                           | <b>0.24571</b> |

|  |      |           |                                                                    |                |
|--|------|-----------|--------------------------------------------------------------------|----------------|
|  | 5149 | LSDDAVVCF | HLA-B*58:01                                                        | <b>0.22816</b> |
|  | 5153 | AVVCFNSTY | HLA-A*34:01, HLA-B*15:02<br>HLA-B*15:21                            | -0.0713        |
|  | 5176 | VLYYQNNVF | HLA-B*15:02, HLA-B*15:21                                           | <b>0.06857</b> |
|  | 5177 | LYYQNNVFM | HLA-A*24:02, HLA-A*24:07                                           | <b>0.03544</b> |
|  | 5201 | HEFCSQHTM | HLA-B*18:01, HLA-B*38:02, HLA-B*44:03                              | <b>0.03852</b> |
|  | 5245 | LMIERFVSL | HLA-A*02:01, HLA-A*02:03, HLA-B*15:02, HLA-B*15:21,<br>HLA-B*38:02 | -0.11314       |
|  | 5247 | IERFVSLAI | HLA-B*44:03                                                        | -0.21713       |
|  | 5250 | FVSLAIDAY | HLA-A*34:01, HLA-B*15:02, HLA-B*15:21, HLA-B*35:05                 | <b>0.00813</b> |
|  | 5252 | SLAIDAYPL | HLA-A*02:01                                                        | <b>0.06109</b> |
|  | 5254 | AIDAYPLTK | HLA-A*11:01                                                        | -0.34359       |
|  | 5266 | QEYADVHL  | HLA-B*18:01, HLA-B*38:02, HLA-B*44:03                              | <b>0.19168</b> |
|  | 5267 | EYADVHLHY | HLA-A*24:02, HLA-A*24:07, HLA-A*33:03, HLA-A*34:01,<br>HLA-B*18:01 | <b>0.00446</b> |
|  | 5270 | DVFHLYLQY | HLA-A*34:01, HLA-B*15:21                                           | -0.12346       |
|  | 5271 | VFHLYLQYI | HLA-A*24:07                                                        | <b>0.09962</b> |
|  | 5273 | HLYLQYIRK | HLA-A*11:01                                                        | <b>0.06065</b> |
|  | 5274 | LYLQYIRKL | HLA-A*24:02, HLA-A*24:07                                           | <b>0.2989</b>  |
|  | 5289 | HMLDMYSVM | HLA-B*15:02, HLA-B*15:21                                           | -0.2824        |
|  | 5290 | MLDMYSVML | HLA-A*02:01                                                        | -0.162         |
|  | 5298 | LTNDNTSRY | HLA-A*34:01                                                        | -0.08221       |
|  | 5307 | WEPEFYEAM | HLA-B*18:01                                                        | <b>0.22547</b> |
|  | 5308 | EPEFYEAMY | HLA-B*35:05                                                        | <b>0.17402</b> |
|  | 5322 | LQAVGACVL | HLA-B*38:02                                                        | -0.0303        |
|  | 5356 | HVISTSHKL | HLA-A*34:01                                                        | <b>0.02312</b> |
|  | 5363 | KLVLSVNPY | HLA-B*15:02, HLA-B*15:21                                           | -0.13664       |
|  | 5364 | LVLVSNPYV | HLA-A*02:01                                                        | -0.0681        |
|  | 5379 | DVTDVTQLY | HLA-A*34:01                                                        | <b>0.10385</b> |
|  | 5385 | QLYLGMSY  | HLA-B*15:02, HLA-B*15:21                                           | <b>0.20743</b> |
|  | 5391 | MSYYCKSHK | HLA-A*11:01                                                        | -0.02267       |
|  | 5396 | KSHKPPISF | HLA-B*58:01                                                        | -0.00747       |
|  | 5398 | HKPPISFPL | HLA-B*38:02                                                        | -0.11279       |
|  | 5454 | KLFAAETLK | HLA-A*11:01                                                        | <b>0.34997</b> |
|  | 5462 | KATEETFKL | HLA-B*58:01                                                        | -0.09616       |
|  | 5464 | TEETFKLSY | HLA-B*18:01, HLA-B*44:03                                           | <b>0.00883</b> |
|  | 5466 | ETFKLSYGI | HLA-A*34:01                                                        | <b>0.08282</b> |
|  | 5469 | KLSYGIATV | HLA-A*02:01, HLA-A*02:03                                           | <b>0.08282</b> |
|  | 5470 | LSYGIATVR | HLA-A*33:03                                                        | <b>0.00758</b> |
|  | 5476 | TVREVLSDR | HLA-A*33:03                                                        | -0.16766       |

|  |      |            |                                                                                                |                |
|--|------|------------|------------------------------------------------------------------------------------------------|----------------|
|  | 5478 | REVLSDREL  | HLA-B*44:03                                                                                    | <b>0.34667</b> |
|  | 5484 | RELHLSWEV  | HLA-B*18:01, HLA-B*38:02, HLA-B*44:03                                                          | <b>0.17203</b> |
|  | 5515 | KVQIGEYTF  | HLA-A*24:02, HLA-A*24:07, HLA-B*58:01                                                          | <b>0.05271</b> |
|  | 5517 | QIGEYTFEK  | HLA-A*11:01                                                                                    | <b>0.2015</b>  |
|  | 5526 | GDYGDAVVY  | HLA-B*44:03                                                                                    | <b>0.32183</b> |
|  | 5527 | DYGDAVVYR  | HLA-A*33:03                                                                                    | <b>0.11594</b> |
|  | 5532 | VVYRGTTY   | HLA-A*11:01, HLA-A*34:01<br>HLA-B*15:02, HLA-B*15:13, HLA-B*15:21, HLA-B*35:05,<br>HLA-B*58:01 | -0.21535       |
|  | 5534 | YRGTTYKL   | HLA-B*38:02                                                                                    | <b>0.17878</b> |
|  | 5541 | KLVNGDYFV  | HLA-A*02:01, HLA-A*02:03                                                                       | -0.00533       |
|  | 5548 | FVLTSHTVM  | HLA-B*15:02, HLA-B*15:21, HLA-B*35:05                                                          | -0.07451       |
|  | 5562 | TLVPQEHYV  | HLA-A*02:01, HLA-A*02:03                                                                       | -0.36401       |
|  | 5568 | HYVRITGLY  | HLA-A*34:01                                                                                    | -0.04115       |
|  | 5584 | EFSSNVANY  | HLA-A*34:01                                                                                    | -0.00647       |
|  | 5586 | SSNVANYQK  | HLA-A*11:01                                                                                    | -0.07664       |
|  | 5592 | YQKVGMMQKY | HLA-B*15:02, HLA-B*15:13, HLA-B*15:21                                                          | -0.11514       |
|  | 5612 | SHFAIGLAL  | HLA-B*38:02                                                                                    | <b>0.18306</b> |
|  | 5614 | FAIGLALYY  | HLA-B*15:13, HLA-B*15:21, HLA-B*35:05, HLA-B*58:01                                             | <b>0.07705</b> |
|  | 5618 | LALYYPSAR  | HLA-A*33:03                                                                                    | <b>0.17334</b> |
|  | 5619 | ALYYPSARI  | HLA-A*02:03                                                                                    | -0.02207       |
|  | 5629 | YTACSHAAV  | HLA-A*02:03, HLA-A*34:01                                                                       | -0.00719       |
|  | 5635 | AAVDALCEK  | HLA-A*11:01                                                                                    | <b>0.10155</b> |
|  | 5670 | KVNSTLEQY  | HLA-B*58:01                                                                                    | <b>0.04077</b> |
|  | 5675 | LEQYVFCTV  | HLA-B*18:01, HLA-B*44:03                                                                       | -0.01735       |
|  | 5678 | YVFCTVNAL  | HLA-A*02:01, HLA-A*02:03, HLA-A*34:01, HLA-B*15:02,<br>HLA-B*15:21, HLA-B*35:05, HLA-B*38:02   | <b>0.24593</b> |
|  | 5688 | ETTADIVVF  | HLA-A*34:01                                                                                    | -0.021         |
|  | 5697 | DEISMATNY  | HLA-B*18:01, HLA-B*44:03                                                                       | <b>0.02065</b> |
|  | 5699 | ISMATNYDL  | HLA-B*58:01                                                                                    | -0.04876       |
|  | 5713 | RLRAKHVYV  | HLA-B*15:02, HLA-B*15:21                                                                       | <b>0.11471</b> |
|  | 5720 | VYIGDPAQL  | HLA-A*24:02, HLA-A*24:07                                                                       | -0.30937       |
|  | 5740 | LEPEYFNSV  | HLA-B*18:01                                                                                    | <b>0.13524</b> |
|  | 5753 | KTIGPDMFL  | HLA-B*58:01                                                                                    | <b>0.11933</b> |
|  | 5758 | DMFLGTCRR  | HLA-A*33:03                                                                                    | <b>0.10452</b> |
|  | 5758 | DMFLGTCRR  | HLA-A*34:01                                                                                    | <b>0.24348</b> |
|  | 5770 | EIVDTVSAAL | HLA-A*34:01                                                                                    | <b>0.06715</b> |
|  | 5771 | IVDTVSAALV | HLA-A*02:01                                                                                    | -0.21402       |
|  | 5792 | AQCFKMFYK  | HLA-A*11:01                                                                                    | -0.20445       |
|  | 5826 | NPAWRKAVF  | HLA-B*35:05                                                                                    | -0.1361        |



|  |      |            |                                                                                              |                |
|--|------|------------|----------------------------------------------------------------------------------------------|----------------|
|  | 5923 | LQAENVGTGL | HLA-A*02:01, HLA-A*02:03, HLA-B*38:02                                                        | <b>0.1545</b>  |
|  | 5930 | GLFKDCSKV  | HLA-A*02:01, HLA-A*02:03                                                                     | -0.1206        |
|  | 5963 | CVDIPGIPK  | HLA-A*11:01                                                                                  | -0.12036       |
|  | 5973 | MTYRRLISM  | HLA-A*34:01                                                                                  | -0.17386       |
|  | 5977 | RLISMMGFK  | HLA-A*11:01                                                                                  | <b>0.22623</b> |
|  | 5980 | SMMGFKMNY  | HLA-A*11:01, HLA-A*34:01, HLA-B*15:02, HLA-B*15:13,<br>HLA-B*15:21, HLA-B*35:05              | -0.11462       |
|  | 5988 | YQVNGYPNM  | HLA-B*15:02, HLA-B*15:21, HLA-B*38:02                                                        | <b>0.30201</b> |
|  | 6014 | DVEGCHATR  | HLA-A*33:03                                                                                  | <b>0.30187</b> |
|  | 6023 | EAVGTNLPL  | HLA-A*34:01                                                                                  | <b>0.03963</b> |
|  | 6031 | LQLGFSTGV  | HLA-A*02:01, HLA-A*02:03                                                                     | <b>0.27719</b> |
|  | 6041 | LVAVPTGYV  | HLA-A*34:01                                                                                  | -0.33127       |
|  | 6068 | DQFKHLIPL  | HLA-B*38:02                                                                                  | -0.30575       |
|  | 6077 | MYKGLPWNV  | HLA-A*24:02                                                                                  | -0.27886       |
|  | 6093 | MLSDTLKNL  | HLA-A*02:01, HLA-A*02:03                                                                     | <b>0.17009</b> |
|  | 6100 | NLSDRVVFV  | HLA-A*02:01, HLA-A*02:03                                                                     | <b>0.01931</b> |
|  | 6106 | VFVLWAHGF  | HLA-A*24:02, HLA-A*24:07                                                                     | <b>0.10788</b> |
|  | 6108 | VLWAHGFEL  | HLA-A*02:01                                                                                  | <b>0.33197</b> |
|  | 6114 | FELTSMKYF  | HLA-B*18:01, HLA-B*44:03                                                                     | -0.10515       |
|  | 6116 | LTSMKYFVK  | HLA-A*11:01                                                                                  | -0.11765       |
|  | 6121 | YFVKIGPER  | HLA-A*33:03                                                                                  | <b>0.08418</b> |
|  | 6143 | TASDTYACW  | HLA-B*58:01                                                                                  | <b>0.22081</b> |
|  | 6147 | TYACWHHSI  | HLA-A*24:02, HLA-A*24:07                                                                     | <b>0.23373</b> |
|  | 6153 | HSIGFDYVY  | HLA-A*34:01, HLA-B*15:02, HLA-B*15:13, HLA-B*15:21,<br>HLA-B*18:01, HLA-B*35:05, HLA-B*58:01 | -0.21438       |
|  | 6156 | GFDYVYNPF  | HLA-A*24:02                                                                                  | <b>0.01657</b> |
|  | 6158 | DYVYNPFMI  | HLA-A*24:02, HLA-A*24:07                                                                     | <b>0.56221</b> |
|  | 6169 | QQWGFTGNL  | HLA-B*38:02                                                                                  | <b>0.28654</b> |
|  | 6194 | ASCDAIMTR  | HLA-A*11:01                                                                                  | -0.01991       |
|  | 6205 | AVHECFVKR  | HLA-A*33:03                                                                                  | -0.13895       |
|  | 6237 | QHMOVVKAAL | HLA-B*38:02                                                                                  | <b>0.14003</b> |
|  | 6242 | KAALLADKF  | HLA-B*58:01                                                                                  | -0.29399       |
|  | 6244 | ALLADKFPV  | HLA-A*02:01                                                                                  | -0.34559       |
|  | 6245 | LLADKFPVL  | HLA-A*02:01, HLA-A*02:03                                                                     | <b>0.16567</b> |
|  | 6283 | KAYKIEELF  | HLA-B*58:01                                                                                  | <b>0.1449</b>  |
|  | 6288 | EELFYSYAT  | HLA-B*18:01                                                                                  | <b>0.09637</b> |
|  | 6292 | YSYATHSDK  | HLA-A*11:01                                                                                  | <b>0.06738</b> |
|  | 6300 | KFTDGVCLF  | HLA-A*24:02, HLA-A*24:07                                                                     | <b>0.11058</b> |
|  | 6301 | FTDGVCLFW  | HLA-B*58:01                                                                                  | <b>0.10048</b> |
|  | 6320 | SIVCRFDTR  | HLA-A*33:03                                                                                  | <b>0.17586</b> |

|  |      |           |                                                                                           |                |
|--|------|-----------|-------------------------------------------------------------------------------------------|----------------|
|  | 6342 | SLYVKNHAF | HLA-B*15:02, HLA-B*15:21                                                                  | <b>0.0538</b>  |
|  | 6352 | TPAFDKSAF | HLA-B*35:05                                                                               | <b>0.02527</b> |
|  | 6360 | FVNLKQLPF | HLA-B*15:02, HLA-B*15:13, HLA-B*15:21, HLA-B*35:05                                        | <b>0.10244</b> |
|  | 6417 | LYLDAYNMM | HLA-A*24:02, HLA-A*24:07                                                                  | <b>0.31503</b> |
|  | 6418 | YLDAYNMMI | HLA-A*02:01, HLA-A*02:03                                                                  | -0.27361       |
|  | 6424 | MMISAGFSL | HLA-A*02:01, HLA-A*02:03, HLA-B*15:02, HLA-B*15:13, HLA-B*15:21, HLA-B*35:05, HLA-B*38:02 | <b>0.38891</b> |
|  | 6425 | MISAGFSLW | HLA-B*15:13, HLA-B*58:01                                                                  | <b>0.08916</b> |
|  | 6428 | AGFSLWVYK | HLA-A*11:01                                                                               | <b>0.29717</b> |
|  | 6433 | WVYKQFDY  | HLA-A*34:01, HLA-B*15:02, HLA-B*15:13, HLA-B*15:21, HLA-B*35:05                           | <b>0.06486</b> |
|  | 6436 | KQFDYTNLW | HLA-A*24:02, HLA-A*24:07, HLA-B*44:03, HLA-B*58:01                                        | <b>0.00709</b> |
|  | 6439 | DTYNLWNTF | HLA-A*34:01, HLA-B*15:13                                                                  | -0.00081       |
|  | 6441 | YNLWNTFTR | HLA-A*33:03                                                                               | -0.1794        |
|  | 6453 | LENVAFNVV | HLA-B*18:01, HLA-B*44:03                                                                  | <b>0.0664</b>  |
|  | 6455 | NVAFNVVNK | HLA-A*34:01                                                                               | <b>0.04889</b> |
|  | 6477 | IINNTVYTK | HLA-A*11:01                                                                               | <b>0.0645</b>  |
|  | 6494 | FENKTLTPV | HLA-B*18:01, HLA-B*38:02, HLA-B*44:03                                                     | <b>0.08616</b> |
|  | 6498 | TTLPVNVAF | HLA-A*24:07, HLA-B*15:13, HLA-B*35:05, HLA-B*58:01                                        | -0.24291       |
|  | 6500 | LPVNVAFEL | HLA-B*35:05, HLA-B*38:02                                                                  | <b>0.19663</b> |
|  | 6504 | VAFELWAKR | HLA-A*33:03                                                                               | -0.16048       |
|  | 6531 | AANTVIWDY | HLA-B*58:01                                                                               | <b>0.08778</b> |
|  | 6533 | NTVIWDYKR | HLA-A*33:03                                                                               | <b>0.00704</b> |
|  | 6553 | CSMTDIAKK | HLA-A*11:01                                                                               | -0.05636       |
|  | 6564 | ETICAPLTV | HLA-A*34:01                                                                               | -0.06071       |
|  | 6621 | EAVKTQFNY | HLA-A*34:01, HLA-B*35:05                                                                  | -0.0084        |
|  | 6624 | KTQFNYYKK | HLA-A*11:01                                                                               | <b>0.13481</b> |
|  | 6652 | QEFKPRSQM | HLA-B*18:01                                                                               | <b>0.02869</b> |
|  | 6670 | DEFIERYKL | HLA-B*18:01                                                                               | -0.02964       |
|  | 6673 | IERYKLEGY | HLA-B*18:01                                                                               | <b>0.00481</b> |
|  | 6683 | FEHIVYGDF | HLA-B*18:01, HLA-B*44:03                                                                  | -0.19311       |
|  | 6694 | SQLGGLHLL | HLA-A*02:01, HLA-B*38:02                                                                  | <b>0.09274</b> |
|  | 6700 | HLLIGLAKR | HLA-A*33:03                                                                               | -0.21392       |
|  | 6708 | RFKESPFEL | HLA-A*24:02, HLA-A*24:07                                                                  | <b>0.08919</b> |
|  | 6714 | FELEDFIPM | HLA-B*18:01, HLA-B*38:02, HLA-B*44:03                                                     | <b>0.16174</b> |
|  | 6748 | LLDDFVEI  | HLA-A*02:01, HLA-A*02:03                                                                  | -0.00382       |
|  | 6749 | LLDDFVEII | HLA-A*02:01                                                                               | -0.07934       |
|  | 6775 | YTEISFMLW | HLA-B*58:01                                                                               | <b>0.0762</b>  |
|  | 6781 | MLWCKDGHV | HLA-A*02:01, HLA-A*02:03                                                                  | -0.30072       |
|  | 6800 | QAWQPGVAM | HLA-B*15:02, HLA-B*15:21, HLA-B*35:05                                                     | -0.00467       |

|          |      |            |                                                                              |                |
|----------|------|------------|------------------------------------------------------------------------------|----------------|
|          | 6805 | GVAMPNLYK  | HLA-A*11:01                                                                  | -0.26781       |
|          | 6806 | VAMPNLYKM  | HLA-B*58:01                                                                  | -0.26781       |
|          | 6808 | MPNLYKMQR  | HLA-A*33:03                                                                  | <b>0.24316</b> |
|          | 6813 | KMQRMLEK   | HLA-A*11:01                                                                  | <b>0.01876</b> |
|          | 6819 | LEKCDLQNY  | HLA-B*18:01, HLA-B*44:03                                                     | <b>0.37101</b> |
|          | 6843 | KYTQLCQYL  | HLA-A*24:02, HLA-A*24:07                                                     | -0.06866       |
|          | 6848 | CQYLNTLTL  | HLA-B*38:02                                                                  | <b>0.00131</b> |
|          | 6850 | YLNTLT LAV | HLA-A*02:01, HLA-A*02:03                                                     | -0.38452       |
|          | 6854 | LTLAVPYNM  | HLA-B*58:01                                                                  | <b>0.02327</b> |
|          | 6855 | TLAVPYNMR  | HLA-A*33:03                                                                  | <b>0.03262</b> |
|          | 6885 | WLPTGTLLV  | HLA-A*02:01, HLA-A*02:03                                                     | -0.00472       |
|          | 6900 | FVSDADSTL  | HLA-A*34:01                                                                  | -0.29512       |
|          | 6907 | TLIGDCATV  | HLA-A*02:01, HLA-A*02:03                                                     | -0.29512       |
|          | 6913 | ATVHTANKW  | HLA-B*58:01                                                                  | -0.02024       |
|          | 6941 | DSKEGFFTY  | HLA-B*18:01                                                                  | -0.11632       |
|          | 6969 | TEHSWNADL  | HLA-B*38:02, HLA-B*44:03                                                     | -0.03916       |
|          | 6971 | HSWNADLYK  | HLA-A*11:01                                                                  | <b>0.02621</b> |
|          | 6978 | YKLMGHFAW  | HLA-B*18:01                                                                  | -0.21969       |
|          | 6979 | KLMGHFAWW  | HLA-B*58:01                                                                  | <b>0.06492</b> |
|          | 6982 | GHFAWWTAF  | HLA-B*38:02                                                                  | <b>0.22651</b> |
|          | 7000 | EAFLIGCNY  | HLA-A*34:01, HLA-B*15:02, HLA-B*15:13, HLA-B*15:21, HLA-B*35:05              | <b>0.07781</b> |
|          | 7013 | REQIDGYVM  | HLA-B*44:03                                                                  | <b>0.0822</b>  |
|          | 7019 | YVMHANYIF  | HLA-A*24:02, HLA-A*24:07, HLA-B*15:02, HLA-B*15:13, HLA-B*15:21, HLA-B*35:05 | -0.12171       |
|          | 7020 | VMHANYIFW  | HLA-A*24:07, HLA-B*58:01                                                     | -0.25594       |
|          | 7021 | MHANYIFWR  | HLA-A*33:03                                                                  | -0.02099       |
|          | 7026 | IFWRNTNPI  | HLA-A*24:02, HLA-A*24:07                                                     | <b>0.00222</b> |
|          | 7028 | WRNTNPIQL  | HLA-B*38:02                                                                  | -0.41327       |
|          | 7034 | IQLSSYSLF  | HLA-A*24:02, HLA-A*24:07                                                     | -0.11819       |
|          | 7039 | YSLFDMSKF  | HLA-B*15:13                                                                  | <b>0.00966</b> |
|          | 7039 | YSLFDMSKF  | HLA-B*58:01                                                                  | -0.17256       |
|          | 7044 | MSKFPLKLR  | HLA-A*33:03                                                                  | -0.11517       |
| ORF2 (S) | 1    | FVFLVLLPL  | HLA-A*02:01, HLA-A*34:01                                                     | <b>0.04076</b> |
|          | 23   | LPPAYTNSF  | HLA-B*35:05                                                                  | -0.03341       |
|          | 35   | VYYPDKVFR  | HLA-A*33:03                                                                  | -0.09052       |
|          | 55   | LPFFSNVTW  | HLA-B*15:13, HLA-B*35:05                                                     | <b>0.04613</b> |
|          | 83   | LPFNDGVYF  | HLA-B*15:02, HLA-B*15:13, HLA-B*15:21, HLA-B*18:01, HLA-B*35:05              | <b>0.11767</b> |
|          | 88   | GVYFASTEK  | HLA-A*11:01                                                                  | <b>0.09023</b> |

|  |     |           |                                                                              |                |
|--|-----|-----------|------------------------------------------------------------------------------|----------------|
|  | 143 | YYHKNNKSW | HLA-A*24:02, HLA-A*24:07                                                     | -0.49755       |
|  | 151 | WMESEFRVY | HLA-B*15:02, HLA-B*15:21, HLA-B*35:05                                        | <b>0.14153</b> |
|  | 159 | YSSANNCTF | HLA-A*24:07, HLA-B*15:02, HLA-B*15:13, HLA-B*15:21, HLA-B*35:05, HLA-B*58:01 | -0.04954       |
|  | 161 | SANNCTFEY | HLA-A*11:01, HLA-B*15:02, HLA-B*15:13, HLA-B*15:21, HLA-B*35:05, HLA-B*58:01 | <b>0.13273</b> |
|  | 166 | TFEYVSQPF | HLA-A*24:02, HLA-A*24:07                                                     | -0.19099       |
|  | 167 | FEYVSQPFL | HLA-B*18:01, HLA-B*38:02, HLA-B*44:03                                        | -0.17076       |
|  | 191 | FVFNIDGY  | HLA-A*34:01, HLA-B*15:21                                                     | -0.0215        |
|  | 192 | VFNIDGYF  | HLA-A*24:02                                                                  | <b>0.10041</b> |
|  | 201 | KIYSKHTPI | HLA-A*02:03                                                                  | -0.32094       |
|  | 235 | TRFQTLAL  | HLA-B*38:02                                                                  | -0.0377        |
|  | 239 | TLLALHRSY | HLA-B*15:02, HLA-B*15:21                                                     | <b>0.00244</b> |
|  | 240 | LLALHRSYL | HLA-A*02:03                                                                  | -0.06002       |
|  | 257 | WTAGAAAYY | HLA-A*34:01, HLA-B*58:01                                                     | <b>0.15259</b> |
|  | 264 | YYVGYLQPR | HLA-A*33:03                                                                  | -0.07078       |
|  | 268 | YLQPRTFLL | HLA-A*02:01, HLA-A*02:03, HLA-A*24:02, HLA-A*24:07, HLA-B*38:02              | <b>0.1305</b>  |
|  | 301 | TLKSFTVEK | HLA-A*11:01, HLA-A*33:03                                                     | <b>0.00741</b> |
|  | 311 | IYQTSNFRV | HLA-A*24:02, HLA-A*24:07                                                     | -0.03669       |
|  | 320 | QPTESIVRF | HLA-B*35:05                                                                  | <b>0.14261</b> |
|  | 338 | GEVFNATRF | HLA-B*44:03                                                                  | <b>0.22473</b> |
|  | 342 | NATRFASVY | HLA-A*34:01, HLA-B*15:21                                                     | <b>0.10001</b> |
|  | 344 | TRFASVYAW | HLA-B*38:02, HLA-B*44:03                                                     | -0.02513       |
|  | 346 | FASVYAWNR | HLA-A*33:03                                                                  | <b>0.20423</b> |
|  | 348 | SVYAWNRKR | HLA-A*33:03                                                                  | <b>0.16546</b> |
|  | 360 | CVADYSVLY | HLA-A*11:01, HLA-A*34:01, HLA-B*15:21                                        | -0.09595       |
|  | 365 | SVLYNSASF | HLA-B*15:02, HLA-B*15:13, HLA-B*15:21, HLA-B*35:05                           | -0.23299       |
|  | 368 | YNSASFSTF | HLA-A*24:02, HLA-A*24:07, HLA-B*15:02, HLA-B*15:13, HLA-B*15:21, HLA-B*35:05 | -0.18217       |
|  | 369 | NSASFSTFK | HLA-A*11:01                                                                  | -0.09434       |
|  | 371 | ASFSTFKCY | HLA-B*15:02                                                                  | -0.19397       |
|  | 387 | NDLCFTNVY | HLA-B*18:01                                                                  | <b>0.11135</b> |
|  | 391 | FTNVYADSF | HLA-B*15:13, HLA-B*58:01                                                     | -0.00527       |
|  | 416 | KIADYNYKL | HLA-A*02:01                                                                  | -0.10379       |
|  | 447 | NYNYLYRLF | HLA-A*24:02                                                                  | <b>0.0171</b>  |
|  | 448 | YNYLYRLFR | HLA-A*33:03                                                                  | <b>0.0918</b>  |
|  | 449 | NYLYRLFRK | HLA-A*33:03                                                                  | <b>0.16168</b> |
|  | 453 | RLFRKSNLK | HLA-A*11:01                                                                  | -0.28759       |
|  | 457 | KSNLKPFER | HLA-A*33:03                                                                  | -0.0764        |
|  | 463 | FERDISTEI | HLA-B*44:03                                                                  | <b>0.10425</b> |

|  |     |           |                                                                    |                |
|--|-----|-----------|--------------------------------------------------------------------|----------------|
|  | 488 | YFPLQSYGF | HLA-A*24:02, HLA-A*24:07                                           | -0.26661       |
|  | 504 | YQPYRVVVL | HLA-B*38:02                                                        | <b>0.1409</b>  |
|  | 506 | PYRVVLSF  | HLA-A*24:02, HLA-A*24:07                                           | <b>0.03138</b> |
|  | 553 | ESNKKFLPF | HLA-B*15:02, HLA-B*15:13                                           | -0.33474       |
|  | 553 | ESNKKFLPF | HLA-B*15:21                                                        | -0.33474       |
|  | 558 | FLPFQQFGR | HLA-A*33:03                                                        | <b>0.01096</b> |
|  | 567 | DIADTTDAV | HLA-A*34:01                                                        | <b>0.15094</b> |
|  | 603 | TSNQVAVLY | HLA-B*58:01                                                        | -0.01327       |
|  | 624 | HADQLTPTW | HLA-B*58:01                                                        | -0.0703        |
|  | 627 | QLTPTWRVY | HLA-B*15:02, HLA-B*15:21                                           | <b>0.31555</b> |
|  | 634 | VYSTGSNVF | HLA-A*24:02, HLA-A*24:07                                           | -0.11871       |
|  | 637 | TGSNVFQTR | HLA-A*33:03                                                        | <b>0.01511</b> |
|  | 676 | QTNSPRRAR | HLA-A*33:03                                                        | -0.06411       |
|  | 686 | VASQSIIAY | HLA-B*15:02, HLA-B*15:13, HLA-B*15:21, HLA-B*35:05,<br>HLA-B*58:01 | -0.0709        |
|  | 688 | SQSIIAYTM | HLA-B*38:02                                                        | <b>0.26621</b> |
|  | 690 | SIIAYTMSL | HLA-A*02:01, HLA-A*02:03, HLA-A*34:01, HLA-B*15:21,<br>HLA-B*38:02 | -0.12935       |
|  | 698 | LGAENSVAY | HLA-B*15:02, HLA-B*15:21, HLA-B*35:05                              | <b>0.00912</b> |
|  | 711 | IAIPTNFTI | HLA-A*24:02, HLA-A*24:07, HLA-B*15:13, HLA-B*58:01                 | <b>0.18523</b> |
|  | 713 | IPTNFTISV | HLA-B*35:05                                                        | <b>0.17229</b> |
|  | 717 | FTISVTTEI | HLA-A*02:01, HLA-A*02:03, HLA-A*34:01                              | <b>0.04473</b> |
|  | 724 | EILPVSMTK | HLA-A*11:01, HLA-A*34:01                                           | -0.25581       |
|  | 732 | KTSVDCTMY | HLA-B*58:01                                                        | -0.11115       |
|  | 733 | TSVDCTMYI | HLA-B*58:01                                                        | -0.1306        |
|  | 756 | GSFCTQLNR | HLA-A*11:01                                                        | -0.10063       |
|  | 761 | QLNRALTGI | HLA-A*02:03                                                        | <b>0.1302</b>  |
|  | 814 | RSFIEDLLF | HLA-B*58:01                                                        | <b>0.27446</b> |
|  | 820 | LLFNKVTLA | HLA-A*02:01, HLA-A*02:03                                           | -0.11337       |
|  | 826 | TLADAGFIK | HLA-A*11:01                                                        | <b>0.28158</b> |
|  | 860 | LPPLLTDEM | HLA-B*35:05                                                        | <b>0.0882</b>  |
|  | 868 | MIAQYTSAL | HLA-A*02:03, HLA-A*34:01, HLA-B*15:02, HLA-B*15:21,<br>HLA-B*35:05 | -0.18768       |
|  | 877 | LAGTITSGW | HLA-B*58:01                                                        | <b>0.09638</b> |
|  | 879 | GTITSGWTF | HLA-A*24:02, HLA-A*24:07, HLA-B*15:13, HLA-B*58:01                 | <b>0.16268</b> |
|  | 885 | WTFGAGAAL | HLA-A*34:01, HLA-B*15:21                                           | <b>0.19798</b> |
|  | 893 | LQIPFAMQM | HLA-B*38:02                                                        | -0.03301       |
|  | 895 | IPFAMQMAY | HLA-B*15:02, HLA-B*15:13, HLA-B*15:21, HLA-B*18:01,<br>HLA-B*35:05 | -0.32801       |
|  | 897 | FAMQMAYRF | HLA-B*15:13, HLA-B*35:05, HLA-B*58:01                              | -0.28061       |
|  | 938 | SSTASALGK | HLA-A*11:01                                                        | -0.06186       |

|      |      |           |                                                    |          |
|------|------|-----------|----------------------------------------------------|----------|
|      | 974  | SVLNDILSR | HLA-A*11:01                                        | 0.03075  |
|      | 975  | VLNDILSRL | HLA-A*02:01, HLA-A*02:03                           | 0.03     |
|      | 982  | RLDKVEAEV | HLA-A*02:01                                        | 0.01617  |
|      | 988  | AEVQIDRLI | HLA-B*44:03                                        | 0.08452  |
|      | 999  | RLQSLQTYV | HLA-A*02:01, HLA-A*02:03, HLA-B*44:03              | -0.29331 |
|      | 1015 | AEIRASANL | HLA-B*44:03                                        | 0.00689  |
|      | 1019 | ASANLAATK | HLA-A*11:01                                        | 0.08792  |
|      | 1059 | VVFLHVTYV | HLA-A*02:01, HLA-A*02:03, HLA-A*34:01              | 0.1278   |
|      | 1061 | FLHVTYVPA | HLA-A*02:03                                        | 0.11472  |
|      | 1064 | VTYVPAQEK | HLA-A*11:01                                        | 0.02711  |
|      | 1094 | FVSNQTHWF | HLA-B*15:1, HLA-B*15:21                            | 0.16605  |
|      | 1098 | GTHWFVTQR | HLA-A*11:01, HLA-A*33:03                           | 0.35133  |
|      | 1112 | QIITDNTF  | HLA-B*15:02, HLA-B*15:21                           | 0.15816  |
|      | 1200 | QELGKYEQY | HLA-B*18:01, HLA-B*44:03                           | -0.16616 |
|      | 1205 | YEQYIKWPW | HLA-B*18:01, HLA-B*44:03                           | 0.06574  |
|      | 1207 | QYIKWPWYI | HLA-A*24:02, HLA-A*24:07                           | 0.21624  |
|      | 1208 | YIKWPWYIW | HLA-B*58:01                                        | 0.42524  |
|      | 1211 | WPWYIWLGF | HLA-B*18:01, HLA-B*35:05                           | 0.41673  |
|      | 1219 | FIAGLIAIV | HLA-A*02:01, HLA-A*02:03                           | 0.27206  |
|      | 1236 | MTSCCCLK  | HLA-A*11:01, HLA-A*33:03                           | -0.36816 |
| ORF4 | 15   | SVLLFLAFV | HLA-A*02:01                                        | 0.19022  |
|      | 17   | LLFLAFVVF | HLA-B*15:02, HLA-B*15:13, HLA-B*15:21              | 0.2341   |
|      | 19   | FLAFVVFL  | HLA-A*02:01, HLA-A*02:03                           | 0.30188  |
|      | 25   | FLLVTLAIL | HLA-A*02:01                                        | 0.17608  |
|      | 29   | TLAILTALR | HLA-A*33:03                                        | 0.1989   |
|      | 33   | LTALRLCAY | HLA-B*15:02, HLA-B*15:21                           | 0.01886  |
|      | 49   | SLVKPSFYV | HLA-A*02:01, HLA-A*02:03                           | -0.27349 |
|      | 50   | LVKPSFYVY | HLA-B*15:02, HLA-B*15:13, HLA-B*15:21, HLA-B*35:05 | -0.11106 |
|      | 60   | RVKNLNSSR | HLA-A*33:03                                        |          |
| ORF5 | 14   | KLLEQWNLV | HLA-A*02:01                                        | 0.18092  |
|      | 25   | FLFTWICL  | HLA-A*02:01                                        | 0.35397  |
|      | 28   | LTWICLLQF | HLA-B*58:01                                        | 0.06584  |
|      | 33   | LLQFAYANR | HLA-A*33:03                                        | 0.14406  |
|      | 36   | FAYANRNRF | HLA-B*15:13                                        | 0.10537  |
|      | 38   | YANRNRFY  | HLA-B*35:05                                        | 0.18472  |
|      | 42   | NRFLYIIL  | HLA-B*38:02                                        | 0.13484  |
|      | 46   | YIILIFLW  | HLA-B*58:01                                        | 0.033    |
|      | 49   | KLIFLWLLW | HLA-B*58:01                                        | 0.34287  |
|      | 53   | LWLLWPVTL | HLA-A*24:02, HLA-A*24:07                           | 0.24802  |
|      | 54   | WLLWPVTLA | HLA-A*02:01                                        | 0.27363  |

|      |     |            |                                                                                              |                |
|------|-----|------------|----------------------------------------------------------------------------------------------|----------------|
|      | 56  | LWPVTLACF  | HLA-A*24:02, HLA-A*24:07                                                                     | <b>0.06682</b> |
|      | 64  | FVLAAYRI   | HLA-A*02:01                                                                                  | <b>0.13985</b> |
|      | 66  | LAAYRINW   | HLA-B*58:01                                                                                  | <b>0.2079</b>  |
|      | 83  | MACLVGLMW  | HLA-B*58:01                                                                                  | -0.06852       |
|      | 88  | GLMWLSYFI  | HLA-A*02:01, HLA-A*02:03                                                                     | <b>0.06464</b> |
|      | 91  | WLSYFIASF  | HLA-B*15:02, HLA-B*15:13, HLA-B*15:21                                                        | <b>0.11822</b> |
|      | 92  | LSYFIASFR  | HLA-A*11:01, HLA-A*33:03                                                                     | <b>0.21181</b> |
|      | 93  | SYFIASFRL  | HLA-A*24:02, HLA-A*24:07                                                                     | <b>0.18333</b> |
|      | 94  | YFIASFRLF  | HLA-A*24:02, HLA-A*24:07                                                                     | <b>0.06887</b> |
|      | 96  | IASFRLFAR  | HLA-A*33:03                                                                                  | <b>0.22572</b> |
|      | 100 | RLFARTRSM  | HLA-B*15:02, HLA-B*15:21                                                                     | <b>0.11133</b> |
|      | 101 | LFARTRSMW  | HLA-A*24:02, HLA-A*24:07                                                                     | -0.09092       |
|      | 135 | SELVIGAVI  | HLA-B*44:03                                                                                  | <b>0.25658</b> |
|      | 169 | VATSRTLSTY | HLA-B*15:02, HLA-B*15:13, HLA-B*15:21, HLA-B*35:05,<br>HLA-B*58:01                           | -0.17295       |
|      | 170 | ATSRTLSTYY | HLA-A*11:01, HLA-A*34:01, HLA-B*58:01                                                        | -0.11604       |
|      | 171 | TSRTLSTYYK | HLA-A*11:01                                                                                  | -0.11595       |
|      | 177 | YYKLGASQR  | HLA-A*33:03                                                                                  | -0.21863       |
|      | 195 | YSRYRIGNY  | HLA-A*34:01, HLA-B*15:02, HLA-B*15:13, HLA-B*15:21                                           | <b>0.21358</b> |
|      | 197 | RYRIGNYKL  | HLA-A*24:02, HLA-A*24:07                                                                     | <b>0.04851</b> |
| ORF9 | 44  | LPNNTASWF  | HLA-B*35:05                                                                                  | <b>0.05582</b> |
|      | 47  | NTASWFTAL  | HLA-A*34:01, HLA-B*15:21                                                                     | <b>0.22775</b> |
|      | 65  | FPRGQGVPI  | HLA-B*35:05                                                                                  | -0.00164       |
|      | 78  | SPDDQIGYY  | HLA-B*35:05                                                                                  | <b>0.06844</b> |
|      | 83  | IGYYRRATR  | HLA-A*33:03                                                                                  | <b>0.1499</b>  |
|      | 85  | YYRRATRRI  | HLA-A*24:02<br>HLA-A*24:07                                                                   | <b>0.21744</b> |
|      | 99  | KMKDLSPRW  | HLA-B*58:01                                                                                  | -0.19333       |
|      | 102 | DLSPRWYFY  | HLA-A*34:01                                                                                  | <b>0.25933</b> |
|      | 103 | LSPRWYFY   | HLA-A*24:07, HLA-B*58:01                                                                     | <b>0.35734</b> |
|      | 123 | GANKDGIW   | HLA-B*58:01                                                                                  | <b>0.02448</b> |
|      | 180 | QASSRSSR   | HLA-A*33:03                                                                                  | -0.56178       |
|      | 186 | SSRSRNSSR  | HLA-A*33:03                                                                                  | -0.34164       |
|      | 221 | LLDRLNQL   | HLA-A*02:01, HLA-A*02:03                                                                     | -0.01446       |
|      | 265 | KAYNVTQAF  | HLA-A*24:02, HLA-A*24:07, HLA-B*15:02, HLA-B*15:13,<br>HLA-B*15:21, HLA-B*35:05, HLA-B*58:01 | -0.00587       |
|      | 268 | NVTQAFGRR  | HLA-A*33:03                                                                                  | <b>0.10318</b> |
|      | 298 | KHWPQIAQF  | HLA-A*24:02, HLA-A*24:07, HLA-B*38:02                                                        | <b>0.03856</b> |
|      | 306 | FAPSASAFF  | HLA-B*15:13, HLA-B*35:05                                                                     | -0.18628       |
|      | 310 | ASAFFGMSR  | HLA-A*11:01                                                                                  | <b>0.03154</b> |

|  |     |           |                                       |                |
|--|-----|-----------|---------------------------------------|----------------|
|  | 315 | GMSRIGMEV | HLA-A*02:03                           | <b>0.07018</b> |
|  | 321 | MEVTPSGTW | HLA-B*15:13, HLA-B*18:01, HLA-B*44:03 | -0.06279       |
|  | 322 | EVTPSGTWL | HLA-A*34:01                           | <b>0.03442</b> |
|  | 324 | TPSGTWLTY | HLA-B*15:21, HLA-B*18:01, HLA-B*35:05 | <b>0.24003</b> |
|  | 328 | TWLYTGAI  | HLA-A*24:07                           | <b>0.11986</b> |
|  | 351 | LLNKHIDAY | HLA-B*15:02, HLA-B*15:21, HLA-B*35:05 | -0.02074       |
|  | 354 | KHIDAYKTF | HLA-A*24:02                           | -0.05918       |
|  | 360 | KTFPTEPK  | HLA-A*11:01                           | <b>0.1306</b>  |
|  | 394 | LPAADLDDF | HLA-B*35:05                           | <b>0.09491</b> |



**Table S2.** Full list of predicted 15-mer HTL epitopes from five different SARS-CoV-2 proteins (ORF1ab, S, E, M, and N) with %Rank less than 1% identified from NetMHCpan 4.0 along with their IFN- $\gamma$  score. A total of 339 promiscuous peptides (bind to more than one different HLA alleles) out of 1,422 predicted peptides were identified and indicated by green color highlight. A total of 875 peptides with positive IFN- $\gamma$  scores out of 1,422 were identified and highlighted by bold-colored text.

| Protein | Start Residue | Peptide          | HLA Class II Allele                            | IFN- $\gamma$ score |
|---------|---------------|------------------|------------------------------------------------|---------------------|
| ORF1ab  | 16            | LSPVLQVRDVLVRG   | HLA DRB1*15:01                                 | -0.552587           |
|         | 17            | SLPVLQVRDVLVRGF  | HLA DRB1*15:01                                 | -0.50274156         |
|         | 62            | PQLEQPYVFIKRSDA  | HLA DRB1*11:01                                 | -0.37322428         |
|         | 63            | QLEQPYVFIKRSDAR  | HLA DRB1*11:01                                 | -0.066575101        |
|         | 64            | LEQPYVFIKRSDART  | HLA DRB1*11:01, HLA DRB1*12:02                 | -0.1160575          |
|         | 65            | EQPYVFIKRSDARTA  | HLA DRB1*11:01, HLA DRB1*12:02                 | -0.18932492         |
|         | 66            | QPYVFIKRSDARTAP  | HLA DRB1*11:01                                 | -0.16594135         |
|         | 67            | PYVFIKRSDARTAPH  | HLA DRB1*11:01                                 | -0.2621495          |
|         | 85            | MVELVAELEGIQYGR  | HLA DRB1*12:02                                 | <b>0.22164066</b>   |
|         | 86            | VELVAELEGIQYGRS  | HLA DRB1*12:02                                 | <b>0.21184544</b>   |
|         | 170           | TRELMRELNGGAYTR  | HLA DRB1*12:02                                 | <b>0.09058035</b>   |
|         | 171           | RELMRELNGGAYTRY  | HLA DRB1*12:02                                 | <b>0.079825801</b>  |
|         | 178           | NGGAYTRYVDNNFCG  | HLA DRB1*15:02                                 | <b>0.028698538</b>  |
|         | 179           | GGAYTRYVDNNFCGP  | HLA DRB1*15:02                                 | -0.33259633         |
|         | 244           | RSEKSYELQTPFEIK  | HLA DRB1*07:01                                 | <b>0.1123738</b>    |
|         | 245           | SEKSYELQTPFEIKL  | HLA DRB1*07:01, HLA DRB1*16:02                 | <b>0.11812166</b>   |
|         | 246           | EKSYELQTPFEIKLA  | HLA DRB1*07:01, HLA DRB1*16:02                 | <b>0.14008837</b>   |
|         | 273           | FVFPLNSIIKTIQPR  | HLA DRB1*11:01                                 | -0.25530678         |
|         | 274           | VFPLNSIIKTIQPRV  | HLA DRB1*11:01                                 | -0.24941483         |
|         | 276           | PLNSIIKTIQPRVEK  | HLA DRB1*12:02                                 | -0.15153035         |
|         | 277           | LNSIIKTIQPRVEKK  | HLA DRB1*12:02                                 | -0.25481012         |
|         | 278           | NSIIKTIQPRVEKKK  | HLA DRB1*12:02                                 | -0.18888334         |
|         | 379           | GPEHSLAEYHNESGL  | HLA DRB1*15:01                                 | -0.51376695         |
|         | 380           | PEHSLAEYHNESGLK  | HLA DRB1*15:01, HLA DRB1*15:02                 | -0.50054293         |
|         | 381           | EHSLAEYHNESGLKT  | HLA DRB1*15:01, HLA DRB1*15:02                 | -0.31709863         |
|         | 382           | HSLAEYHNESGLKTI  | HLA DRB1*15:01                                 | -0.24287768         |
|         | 388           | HNESGLKTILRKGGGR | HLA DRB1*11:01                                 | <b>0.14848681</b>   |
|         | 389           | NESGLKTILRKGGRT  | HLA DRB1*11:01                                 | <b>0.43200233</b>   |
|         | 390           | ESGLKTILRKGGRTI  | HLA DRB1*11:01                                 | <b>0.50723971</b>   |
|         | 391           | SGLKTILRKGGRTIA  | HLA DRB1*11:01                                 | <b>0.67477291</b>   |
|         | 446           | LNDNLEILQKEKVN   | HLA DRB1*12:02                                 | -0.28006885         |
|         | 447           | NDNLEILQKEKVNIN  | HLA DRB1*12:02                                 | <b>0.13110528</b>   |
|         | 448           | DNLEILQKEKVNININ | HLA DRB1*11:01, HLA DRB1*12:02                 | <b>0.055569224</b>  |
|         | 449           | NLEILQKEKVNININ  | HLA DRB1*12:02                                 | <b>0.26354633</b>   |
|         | 456           | KEKVNINIVGDFKLN  | HLA DRB1*15:01, HLA DRB1*15:02, HLA DRB1*16:02 | -0.10097192         |

|  |     |                 |                                                                   |                    |
|--|-----|-----------------|-------------------------------------------------------------------|--------------------|
|  | 457 | EKVNINIVGDFKLNE | HLA DRB1*12:02, HLA DRB1*15:01, HLA DRB1*15:02,<br>HLA DRB1*16:02 | <b>0.073961117</b> |
|  | 458 | KVNINIVGDFKLNEE | HLA DRB1*12:02, HLA DRB1*15:01, HLA DRB1*15:02,<br>HLA DRB1*16:02 | -0.10696324        |
|  | 459 | VNINIVGDFKLNEEI | HLA DRB1*15:01, HLA DRB1*15:02, HLA DRB1*16:02                    | -0.033490438       |
|  | 475 | IILASFSASTSAFVE | HLA DRB1*07:01                                                    | <b>0.48889866</b>  |
|  | 476 | ILASFSASTSAFVET | HLA DRB1*07:01                                                    | <b>0.37138483</b>  |
|  | 477 | LASFSASTSAFVETV | HLA DRB1*07:01                                                    | <b>0.41160771</b>  |
|  | 478 | ASFSASTSAFVETVK | HLA DRB1*07:01                                                    | <b>0.19966591</b>  |
|  | 483 | STSAFVETVKGLDYK | HLA DRB1*11:01                                                    | <b>0.18968108</b>  |
|  | 484 | TSAFVETVKGLDYKA | HLA DRB1*11:01, HLA DRB1*12:02                                    | <b>0.21531222</b>  |
|  | 485 | SAFVETVKGLDYKAF | HLA DRB1*12:02                                                    | -0.012206208       |
|  | 527 | KSILSPYAFASEAA  | HLA DRB1*12:02                                                    | -0.2415999         |
|  | 528 | SILSPYAFASEAAR  | HLA DRB1*15:01, HLA DRB1*15:02, HLA DRB1*16:02                    | <b>0.17674965</b>  |
|  | 529 | ILSPYAFASEAARV  | HLA DRB1*15:01, HLA DRB1*15:02, HLA DRB1*16:02                    | <b>0.033121519</b> |
|  | 530 | LSPLYAFASEAARVV | HLA DRB1*15:01, HLA DRB1*15:02, HLA DRB1*16:02                    | <b>0.024506055</b> |
|  | 531 | SPLYAFASEAARVVR | HLA DRB1*15:01, HLA DRB1*15:02, HLA DRB1*16:02                    | <b>0.36250218</b>  |
|  | 532 | PLYAFASEAARVRS  | HLA DRB1*07:01, HLA DRB1*16:02                                    | <b>0.29254928</b>  |
|  | 541 | ARVVRISFRTLETA  | HLA DRB1*12:02                                                    | <b>0.48722758</b>  |
|  | 553 | ETAQNSVRVLQKAAI | HLA DRB1*12:02                                                    | -0.23633119        |
|  | 554 | TAQNSVRVLQKAAIT | HLA DRB1*12:02                                                    | <b>0.068440439</b> |
|  | 555 | AQNSVRVLQKAAITI | HLA DRB1*12:02                                                    | -0.027888451       |
|  | 556 | QNSVRVLQKAAITIL | HLA DRB1*12:02                                                    | -0.018083756       |
|  | 557 | NSVRVLQKAAITILD | HLA DRB1*12:02                                                    | -0.17235933        |
|  | 563 | QKAAITILDGISQYS | HLA DRB1*12:02                                                    | -0.34942023        |
|  | 564 | KAAITILDGISQYSL | HLA DRB1*12:02                                                    | -0.50168694        |
|  | 593 | NNLVVMAYITGGVVQ | HLA DRB1*15:01                                                    | -0.41352632        |
|  | 601 | ITGGVVQLTSQWLTN | HLA DRB1*15:01, HLA DRB1*15:02, HLA DRB1*16:02                    | -0.3300186         |
|  | 602 | TGGVVQLTSQWLTNI | HLA DRB1*16:02                                                    | -0.32121582        |
|  | 674 | SVQTFKLVNKFAL   | HLA DRB1*11:01                                                    | -0.58133375        |
|  | 675 | VQTFKLVNKFALC   | HLA DRB1*11:01                                                    | -0.2932627         |
|  | 676 | QTFKLVNKFALCA   | HLA DRB1*11:01                                                    | -0.33515995        |
|  | 714 | KGLYRKCVKSREETG | HLA DRB1*11:01                                                    | -0.3148611         |
|  | 734 | KAPKEIIFLEGETLP | HLA DRB1*12:02, HLA DRB1*15:01, HLA DRB1*15:02,<br>HLA DRB1*16:02 | -0.24929914        |
|  | 735 | APKEIIFLEGETLPT | HLA DRB1*12:02, HLA DRB1*15:01, HLA DRB1*15:02,<br>HLA DRB1*16:02 | <b>0.082149378</b> |
|  | 736 | PKEIIFLEGETLPTE | HLA DRB1*12:02, HLA DRB1*15:01, HLA DRB1*15:02,<br>HLA DRB1*16:02 | <b>0.077069314</b> |
|  | 737 | KEIIFLEGETLPTEV | HLA DRB1*12:02, HLA DRB1*15:02, HLA DRB1*16:02                    | <b>0.51846126</b>  |
|  | 827 | DDTVIEVQGYKSVNI | HLA DRB1*15:01                                                    | -0.2319852         |

|  |      |                 |                                                                   |                    |
|--|------|-----------------|-------------------------------------------------------------------|--------------------|
|  | 828  | DTVIEVQGYKSVNIT | HLA DRB1*15:01, HLA DRB1*15:02                                    | -0.25329015        |
|  | 829  | TVIEVQGYKSVNITF | HLA DRB1*15:01, HLA DRB1*15:02, HLA DRB1*16:02                    | -0.31288866        |
|  | 830  | VIEVQGYKSVNITFE | HLA DRB1*15:01, HLA DRB1*15:02, HLA DRB1*16:02                    | -0.16164877        |
|  | 831  | IEVQGYKSVNITFEL | HLA DRB1*15:01, HLA DRB1*15:02                                    | -0.41585405        |
|  | 832  | EVQGYKSVNITFELD | HLA DRB1*15:01                                                    | -0.2633236         |
|  | 958  | KPLEFGATSAALQPE | HLA DRB1*07:01                                                    | -0.66065581        |
|  | 959  | PLEFGATSAALQPEE | HLA DRB1*07:01                                                    | -0.61293064        |
|  | 1027 | SFSGYLKLTDNVYIK | HLA DRB1*07:01                                                    | <b>0.075951363</b> |
|  | 1028 | FSGYLKLTDNVYIKN | HLA DRB1*07:01, HLA DRB1*15:02                                    | -0.20400283        |
|  | 1029 | SGYLKLTDNVYIKNA | HLA DRB1*07:01, HLA DRB1*15:02                                    | -0.26796184        |
|  | 1052 | VKPTVVVNAANVYLK | HLA DRB1*12:02, HLA DRB1*15:01, HLA DRB1*15:02                    | -0.37547334        |
|  | 1053 | KPTVVVNAANVYLKH | HLA DRB1*12:02, HLA DRB1*15:01, HLA DRB1*15:02,<br>HLA DRB1*16:02 | -0.45376782        |
|  | 1054 | PTVVVNAANVYLKHG | HLA DRB1*15:01, HLA DRB1*15:02, HLA DRB1*16:02                    | <b>0.091724496</b> |
|  | 1055 | TVVVNAANVYLKHGG | HLA DRB1*15:01                                                    | -0.052916021       |
|  | 1086 | ESDDYIATNGPLKVG | HLA DRB1*16:02                                                    | -0.27560246        |
|  | 1087 | SDDYIATNGPLKVG  | HLA DRB1*16:02                                                    | -0.31800246        |
|  | 1123 | NKGEDIQLLSAYEN  | HLA DRB1*12:02                                                    | -0.2003168         |
|  | 1124 | KGEDIQLLSAYENF  | HLA DRB1*12:02                                                    | -0.34475917        |
|  | 1125 | GEDIQLLSAYENFN  | HLA DRB1*12:02, HLA DRB1*15:01, HLA DRB1*16:02                    | -0.41469217        |
|  | 1126 | EDIQLLSAYENFNQ  | HLA DRB1*12:02                                                    | -0.41980237        |
|  | 1170 | RTNVYLAVFDKNLYD | HLA DRB1*16:02                                                    | -0.32634074        |
|  | 1171 | TNVYLAVFDKNLYDK | HLA DRB1*07:01, HLA DRB1*12:02, HLA DRB1*15:02,<br>HLA DRB1*16:02 | -0.32342333        |
|  | 1172 | NVYLAVFDKNLYDKL | HLA DRB1*12:02                                                    | -0.30781439        |
|  | 1186 | LVSSFLEMKSEKQVE | HLA DRB1*11:01                                                    | -0.10828218        |
|  | 1187 | VSSFLEMKSEKQVEQ | HLA DRB1*11:01, HLA DRB1*16:02                                    | <b>0.089900492</b> |
|  | 1198 | QVEQKIAEIPKEEVK | HLA DRB1*12:02                                                    | -0.88669915        |
|  | 1199 | VEQKIAEIPKEEVKP | HLA DRB1*11:01, HLA DRB1*12:02                                    | -0.94164818        |
|  | 1200 | EQKIAEIPKEEVKPF | HLA DRB1*11:01, HLA DRB1*12:02                                    | -0.78571588        |
|  | 1210 | EVKPFITESKPSVEQ | HLA DRB1*11:01                                                    | <b>0.035338064</b> |
|  | 1211 | VKPFITESKPSVEQR | HLA DRB1*11:01                                                    | <b>0.3156851</b>   |
|  | 1248 | FLTENLLLYIDINGN | HLA DRB1*15:01                                                    | -0.055555446       |
|  | 1249 | LTENLLLYIDINGNL | HLA DRB1*15:01                                                    | <b>0.028326154</b> |
|  | 1250 | TENLLLYIDINGNLH | HLA DRB1*15:01                                                    | -0.27724578        |
|  | 1295 | VLTAIVIPTKKAGGT | HLA DRB1*11:01                                                    | <b>0.23158712</b>  |
|  | 1296 | LTAVVIPTKKAGGTT | HLA DRB1*11:01                                                    | <b>0.18044431</b>  |
|  | 1297 | TAVVIPTKKAGGTTE | HLA DRB1*11:01                                                    | <b>0.02444769</b>  |
|  | 1298 | AVVIPTKKAGGTTEM | HLA DRB1*11:01                                                    | -0.28936136        |
|  | 1320 | VPTDNYITYPGQGL  | HLA DRB1*15:01, HLA DRB1*15:02                                    | -0.22405757        |

|  |      |                  |                                                                   |                    |
|--|------|------------------|-------------------------------------------------------------------|--------------------|
|  | 1321 | PTDNYITTPGQGLN   | HLA DRB1*15:01, HLA DRB1*15:02, HLA DRB1*16:02                    | -0.043747134       |
|  | 1322 | TDNYITTPGQGLNG   | HLA DRB1*15:01, HLA DRB1*15:02, HLA DRB1*16:02                    | -0.20247955        |
|  | 1323 | DNYITTPGQGLNGY   | HLA DRB1*15:01, HLA DRB1*15:02, HLA DRB1*16:02                    | -0.0016888477      |
|  | 1324 | NYITTPGQGLNGYT   | HLA DRB1*15:01, HLA DRB1*15:02, HLA DRB1*16:02                    | -0.26969085        |
|  | 1325 | YITTPGQGLNGYTV   | HLA DRB1*15:01, HLA DRB1*15:02                                    | -0.17061748        |
|  | 1333 | GLNGYTVVEAKTVLK  | HLA DRB1*16:02                                                    | -0.093713228       |
|  | 1334 | LNGYTVVEAKTVLKK  | HLA DRB1*16:02                                                    | -0.40134505        |
|  | 1335 | NGYTVVEAKTVLKCC  | HLA DRB1*16:02                                                    | -0.21117347        |
|  | 1348 | KCKSAFYILPSIISN  | HLA DRB1*11:01, HLA DRB1*15:02, HLA DRB1*16:02                    | <b>0.24456538</b>  |
|  | 1349 | CKSAFYILPSIISNE  | HLA DRB1*11:01, HLA DRB1*12:02, HLA DRB1*15:02,<br>HLA DRB1*16:02 | <b>0.28976547</b>  |
|  | 1350 | KSAFYILPSIISNEK  | HLA DRB1*11:01, HLA DRB1*12:02, HLA DRB1*15:02,<br>HLA DRB1*16:02 | <b>0.33784834</b>  |
|  | 1351 | SAFYILPSIISNEKQ  | HLA DRB1*11:01, HLA DRB1*15:02, HLA DRB1*16:02                    | <b>0.088032125</b> |
|  | 1362 | NEKQEILGTVSWNLR  | HLA DRB1*07:01                                                    | <b>0.037044045</b> |
|  | 1363 | EKQEILGTVSWNLRE  | HLA DRB1*07:01, HLA DRB1*15:01, HLA DRB1*15:02,<br>HLA DRB1*16:02 | -0.0096068911      |
|  | 1364 | KQEILGTVSWNLREM  | HLA DRB1*07:01, HLA DRB1*15:01, HLA DRB1*15:02                    | -0.1963119         |
|  | 1365 | QEILGTVSWNLREML  | HLA DRB1*07:01                                                    | <b>0.031508802</b> |
|  | 1393 | VETKAIVSTIQRKYK  | HLA DRB1*12:02                                                    | -0.50582647        |
|  | 1394 | ETKAIVSTIQRKYKG  | HLA DRB1*12:02                                                    | -0.72880984        |
|  | 1395 | TKAIVSTIQRKYKGI  | HLA DRB1*12:02                                                    | -0.15436648        |
|  | 1396 | KAIVSTIQRKYKGIK  | HLA DRB1*12:02                                                    | -0.10905096        |
|  | 1402 | IQRKYKGIKIQEGVV  | HLA DRB1*11:01                                                    | <b>0.15369216</b>  |
|  | 1403 | QRKYKGIKIQEGVVD  | HLA DRB1*11:01                                                    | <b>0.11040284</b>  |
|  | 1411 | IQEGVVDYGARFYFY  | HLA DRB1*15:01                                                    | <b>0.1137742</b>   |
|  | 1412 | QEGVVDYGARFYFYT  | HLA DRB1*15:01                                                    | <b>0.031215859</b> |
|  | 1417 | DYGARFYFYSKTTV   | HLA DRB1*15:01, HLA DRB1*15:02                                    | -0.46338393        |
|  | 1418 | YGARFYFYSKTTVA   | HLA DRB1*15:01, HLA DRB1*15:02, HLA DRB1*16:02                    | -0.6194514         |
|  | 1419 | GARFYFYSKTTVAS   | HLA DRB1*07:01, HLA DRB1*15:01, HLA DRB1*15:02,<br>HLA DRB1*16:02 | -0.48814565        |
|  | 1420 | ARFYFYSKTTVASL   | HLA DRB1*07:01                                                    | -0.39387761        |
|  | 1420 | ARFYFYSKTTVASL   | HLA DRB1*15:02                                                    | -0.069073956       |
|  | 1442 | NETLVTMPLGYVTHG  | HLA DRB1*12:02                                                    | <b>0.27842636</b>  |
|  | 1453 | VTHGLNLEEAAARYMR | HLA DRB1*12:02                                                    | <b>0.056160056</b> |
|  | 1454 | THGLNLEEAAARYMRS | HLA DRB1*12:02                                                    | -0.10066054        |
|  | 1459 | LEEAAARYMRSLKVP  | HLA DRB1*12:02                                                    | <b>0.012642725</b> |
|  | 1460 | EEAARYMRSLKVPAT  | HLA DRB1*11:01, HLA DRB1*12:02                                    | -0.14505697        |
|  | 1461 | EAARYMRSLKVPATV  | HLA DRB1*11:01                                                    | <b>0.043328602</b> |
|  | 1462 | AARYMRSLKVPATVS  | HLA DRB1*11:01                                                    | -0.23289796        |
|  | 1463 | ARYMRSLKVPATVSV  | HLA DRB1*11:01                                                    | -0.61896465        |

|  |      |                  |                                                |                    |
|--|------|------------------|------------------------------------------------|--------------------|
|  | 1477 | VSSPDAVTAYNGYLT  | HLA DRB1*15:01                                 | -0.5097373         |
|  | 1478 | SSPDAVTAYNGYLTSS | HLA DRB1*15:01, HLA DRB1*15:02                 | -0.5097373         |
|  | 1479 | SPDAVTAYNGYLTSS  | HLA DRB1*15:01, HLA DRB1*15:02, HLA DRB1*16:02 | -0.37103342        |
|  | 1480 | PDAVTAYNGYLTSSS  | HLA DRB1*15:01, HLA DRB1*15:02, HLA DRB1*16:02 | -0.3490795         |
|  | 1481 | DAVTAYNGYLTSSSK  | HLA DRB1*15:01, HLA DRB1*15:02                 | -0.53096363        |
|  | 1482 | AVTAYNGYLTSSSKT  | HLA DRB1*15:01                                 | -0.2888732         |
|  | 1496 | TPEEHFIETISLAGS  | HLA DRB1*07:01                                 | -0.10822819        |
|  | 1497 | PEEHFIETISLAGSY  | HLA DRB1*07:01                                 | -0.070484352       |
|  | 1498 | EEHFIETISLAGSYK  | HLA DRB1*07:01, HLA DRB1*11:01, HLA DRB1*16:02 | -0.2995449         |
|  | 1531 | GDKSVYYTSNPTTFH  | HLA DRB1*15:01                                 | -0.10368188        |
|  | 1533 | KSVYYTSNPTTFHLD  | HLA DRB1*07:01                                 | <b>0.041596604</b> |
|  | 1545 | HLDGEVITFDNLKTL  | HLA DRB1*15:01, HLA DRB1*15:02                 | <b>0.13655355</b>  |
|  | 1546 | LDGEVITFDNLKTLL  | HLA DRB1*15:01, HLA DRB1*15:02                 | <b>0.19456278</b>  |
|  | 1547 | DGEVITFDNLKTLLS  | HLA DRB1*15:01, HLA DRB1*15:02                 | <b>0.16475137</b>  |
|  | 1548 | GEVITFDNLKTLLSL  | HLA DRB1*15:01                                 | <b>0.059280899</b> |
|  | 1564 | EVRTIKVFTTVDNIN  | HLA DRB1*15:01                                 | -0.26678133        |
|  | 1566 | RTIKVFTTVDNINLH  | HLA DRB1*16:02                                 | -0.22019882        |
|  | 1567 | TIKVFTTVDNINLHT  | HLA DRB1*15:02, HLA DRB1*16:02                 | -0.18895507        |
|  | 1568 | IKVFTTVDNINLHTQ  | HLA DRB1*07:01, HLA DRB1*15:02, HLA DRB1*16:02 | -0.24795144        |
|  | 1569 | KVFTTVDNINLHTQV  | HLA DRB1*16:02                                 | -0.25357961        |
|  | 1602 | ADVTKIKPHNSHEGK  | HLA DRB1*15:01                                 | -0.28325887        |
|  | 1603 | DVTIKIKPHNSHEGKT | HLA DRB1*15:01, HLA DRB1*15:02                 | -0.49109007        |
|  | 1604 | VTIKIKPHNSHEGKTF | HLA DRB1*15:01, HLA DRB1*15:02                 | -0.3614223         |
|  | 1605 | TKIKPHNSHEGKTFY  | HLA DRB1*15:01                                 | <b>0.53212289</b>  |
|  | 1630 | EAFEYYHTTDPFLG   | HLA DRB1*07:01                                 | <b>0.7473454</b>   |
|  | 1631 | AFEYYHTTDPFLGR   | HLA DRB1*07:01                                 | <b>0.77956564</b>  |
|  | 1632 | FEYYHTTDPFLGRY   | HLA DRB1*07:01                                 | <b>0.11555638</b>  |
|  | 1694 | ALQDAYYRARAGEAA  | HLA DRB1*07:01                                 | <b>0.43996998</b>  |
|  | 1695 | LQDAYYRARAGEAAN  | HLA DRB1*07:01, HLA DRB1*11:01, HLA DRB1*16:02 | <b>0.46088023</b>  |
|  | 1696 | QDAYYRARAGEAANF  | HLA DRB1*07:01, HLA DRB1*11:01, HLA DRB1*16:02 | -0.23526409        |
|  | 1709 | NFCALILAYCNKTVG  | HLA DRB1*15:01, HLA DRB1*15:02                 | -0.014200696       |
|  | 1711 | CALILAYCNKTVGEL  | HLA DRB1*15:01                                 | -0.34481341        |
|  | 1712 | ALILAYCNKTVGELG  | HLA DRB1*15:01                                 | -0.44161946        |
|  | 1725 | LGDVRETMSYLFQHA  | HLA DRB1*07:01                                 | <b>0.042536084</b> |
|  | 1758 | QQTTLKGVEAVMYMG  | HLA DRB1*12:02                                 | <b>0.33755187</b>  |
|  | 1759 | QQTTLKGVEAVMYMGT | HLA DRB1*12:02                                 | <b>0.15259155</b>  |
|  | 1764 | GVEAVMYMGTLSEYEQ | HLA DRB1*12:02                                 | -0.33759888        |
|  | 1765 | VEAVMYMGTLSEYEQF | HLA DRB1*12:02                                 | -0.54395245        |
|  | 1771 | MGTLSYEQFKKGVQI  | HLA DRB1*11:01                                 | -0.3613913         |
|  | 1772 | GTLSEYEQFKKGVQIP | HLA DRB1*11:01                                 | -0.87085008        |

|  |      |                 |                                                                   |                |
|--|------|-----------------|-------------------------------------------------------------------|----------------|
|  | 1773 | TLSYEQFKKGVQIPC | HLA DRB1*11:01                                                    | -0.48118012    |
|  | 1798 | VQQESPFVMSAPPA  | HLA DRB1*16:02                                                    | -0.2941382     |
|  | 1799 | QQESPFVMSAPPAQ  | HLA DRB1*11:01, HLA DRB1*12:02, HLA DRB1*15:02,<br>HLA DRB1*16:02 | -0.31609633    |
|  | 1800 | QESPFVMSAPPAQY  | HLA DRB1*11:01, HLA DRB1*12:02, HLA DRB1*15:02,<br>HLA DRB1*16:02 | -0.15478331    |
|  | 1801 | ESPFVMSAPPAQYE  | HLA DRB1*11:01, HLA DRB1*12:02, HLA DRB1*15:02,<br>HLA DRB1*16:02 | -0.21040286    |
|  | 1802 | SPFVMSAPPAQYEL  | HLA DRB1*11:01, HLA DRB1*12:02, HLA DRB1*15:02,<br>HLA DRB1*16:02 | -0.18691649    |
|  | 1869 | KENSYTTTIKPVYK  | HLA DRB1*11:01                                                    | -0.17750343    |
|  | 1870 | ENSYTTTIKPVYKL  | HLA DRB1*11:01                                                    | -0.13697578    |
|  | 1907 | FTEQPIDLVPNQYP  | HLA DRB1*12:02, HLA DRB1*15:01                                    | -0.47075197    |
|  | 1908 | TEQPIDLVPNQYPN  | HLA DRB1*12:02, HLA DRB1*15:01, HLA DRB1*15:02,<br>HLA DRB1*16:02 | -0.18762311    |
|  | 1909 | EQPIDLVPNQYPNA  | HLA DRB1*12:02, HLA DRB1*15:01, HLA DRB1*15:02,<br>HLA DRB1*16:02 | -0.15613773    |
|  | 1910 | QPIDLVPNQYPNAS  | HLA DRB1*12:02, HLA DRB1*15:01                                    | -0.12838139    |
|  | 1952 | SRELKVTFPDLNGD  | HLA DRB1*15:01                                                    | -0.75297701    |
|  | 1953 | RELKVTFPDLNGDV  | HLA DRB1*15:01, HLA DRB1*15:02                                    | -0.88047866    |
|  | 1954 | ELKVTFPDLNGDVV  | HLA DRB1*15:01, HLA DRB1*15:02                                    | -0.48028134    |
|  | 1962 | DLNGDVVAIDYKHYT | HLA DRB1*12:02                                                    | -0.76428731    |
|  | 1963 | LNGDVVAIDYKHYP  | HLA DRB1*12:02                                                    | -0.80127992    |
|  | 1964 | NGDVVAIDYKHYP   | HLA DRB1*12:02                                                    | -0.45343102    |
|  | 1965 | GDVVAIDYKHYP    | HLA DRB1*12:02                                                    | -0.42693816    |
|  | 1970 | IDYKHYP         | HLA DRB1*11:01                                                    | -0.13972723    |
|  | 1971 | DYKHYP          | HLA DRB1*11:01                                                    | -0.042158114   |
|  | 1972 | YKHYP           | HLA DRB1*11:01                                                    | -0.2310786     |
|  | 1975 | YTPSFKKGAKLLHKP | HLA DRB1*11:01                                                    | -0.47902691    |
|  | 1976 | TPSFKKGAKLLHKPI | HLA DRB1*11:01                                                    | -0.00052440326 |
|  | 1985 | LLHKPIVWHVNNATN | HLA DRB1*15:01, HLA DRB1*15:02                                    | -0.036794254   |
|  | 1986 | LHKPIVWHVNNATNK | HLA DRB1*15:01, HLA DRB1*15:02, HLA DRB1*16:02                    | -0.19683503    |
|  | 1987 | HKPIVWHVNNATNKA | HLA DRB1*15:01, HLA DRB1*15:02, HLA DRB1*16:02                    | -0.2423791     |
|  | 1988 | KPIVWHVNNATNKAT | HLA DRB1*15:01, HLA DRB1*15:02                                    | -0.19759012    |
|  | 2015 | STKPVETSNSFDVLK | HLA DRB1*07:01                                                    | -0.54491285    |
|  | 2016 | TKPVETSNSFDVLKS | HLA DRB1*07:01                                                    | -0.66171762    |
|  | 2020 | ETSNSFDVLKSEDAQ | HLA DRB1*16:02                                                    | -0.30753224    |
|  | 2021 | TSNSFDVLKSEDAQG | HLA DRB1*16:02                                                    | -0.070466066   |
|  | 2022 | SNSFDVLKSEDAQGM | HLA DRB1*16:02                                                    | -0.055015627   |
|  | 2023 | NSFDVLKSEDAQGM  | HLA DRB1*16:02                                                    | -0.36207716    |
|  | 2096 | MAAYVDNSSLTIKKP | HLA DRB1*07:01, HLA DRB1*16:02                                    | -0.31825308    |

|  |      |                  |                                                                |                   |
|--|------|------------------|----------------------------------------------------------------|-------------------|
|  | 2114 | SRVLGLKTLATHGLA  | HLA DRB1*12:02                                                 | <b>0.51038277</b> |
|  | 2115 | RVLGLKTLATHGLAA  | HLA DRB1*12:02                                                 | <b>0.43266595</b> |
|  | 2116 | VLGLKTLATHGLAAV  | HLA DRB1*12:02                                                 | <b>0.323982</b>   |
|  | 2134 | PWDTIANYAKPFLNK  | HLA DRB1*15:01                                                 | -0.25570219       |
|  | 2135 | WDTIANYAKPFLNKV  | HLA DRB1*15:01                                                 | -0.54848052       |
|  | 2144 | PFLNKVVSTTTNIVT  | HLA DRB1*07:01                                                 | -0.29998765       |
|  | 2145 | FLNKVVSTTTNIVTR  | HLA DRB1*07:01                                                 | -0.4301579        |
|  | 2146 | LNKVVSTTTNIVTRC  | HLA DRB1*07:01                                                 | -0.3782325        |
|  | 2147 | NKVVSTTTNIVTRCL  | HLA DRB1*07:01                                                 | -0.39253427       |
|  | 2178 | QLCTFTRSTNSRIKA  | HLA DRB1*07:01                                                 | -0.21777362       |
|  | 2179 | LCTFTRSTNSRIKAS  | HLA DRB1*07:01                                                 | -0.095922436      |
|  | 2185 | STNSRIKASMPPTIA  | HLA DRB1*07:01                                                 | -0.49616959       |
|  | 2186 | TNSRIKASMPPTIAK  | HLA DRB1*07:01                                                 | -0.18805364       |
|  | 2187 | NSRIKASMPPTIAKN  | HLA DRB1*07:01                                                 | -0.42536127       |
|  | 2210 | CLEASFNYLKSPNFS  | HLA DRB1*07:01, HLA DRB1*12:02, HLA DRB1*16:02                 | -0.094357236      |
|  | 2211 | LEASFNYLKSPNFSK  | HLA DRB1*07:01, HLA DRB1*12:02, HLA DRB1*15:02, HLA DRB1*16:02 | -0.12722255       |
|  | 2212 | EASFNYLKSPNFSKL  | HLA DRB1*07:01, HLA DRB1*12:02, HLA DRB1*15:02, HLA DRB1*16:02 | -0.37773341       |
|  | 2213 | ASFNYLKSPNFSKLI  | HLA DRB1*16:02                                                 | -0.026528299      |
|  | 2238 | VCLGSLIYSTAALGV  | HLA DRB1*07:01                                                 | <b>0.49861583</b> |
|  | 2239 | CLGSLIYSTAALGVL  | HLA DRB1*07:01                                                 | <b>0.35282643</b> |
|  | 2240 | LGSLIYSTAALGVLM  | HLA DRB1*07:01                                                 | <b>0.49521512</b> |
|  | 2241 | GSLIYSTAALGVLS   | HLA DRB1*07:01                                                 | <b>0.30884964</b> |
|  | 2264 | TGYREGYLNSTNVTI  | HLA DRB1*07:01                                                 | -0.41173481       |
|  | 2265 | GYREGYLNSTNVTIA  | HLA DRB1*07:01                                                 | -0.24449529       |
|  | 2266 | YREGYLNSTNVTIAT  | HLA DRB1*07:01, HLA DRB1*16:02                                 | -0.43067608       |
|  | 2267 | REGYLNSTNVTIATY  | HLA DRB1*07:01, HLA DRB1*15:02, HLA DRB1*16:02                 | -0.31028204       |
|  | 2268 | EGYLNSTNVTIATYC  | HLA DRB1*07:01                                                 | -0.33203241       |
|  | 2294 | GLDSLDTYPSLETIQ  | HLA DRB1*15:01, HLA DRB1*15:02                                 | -0.34549467       |
|  | 2295 | LDSLDTYPSLETIQI  | HLA DRB1*15:01, HLA DRB1*15:02                                 | -0.54310262       |
|  | 2296 | DSDLDTYPSLETIQIT | HLA DRB1*15:01                                                 | -0.19638859       |
|  | 2387 | FASFYYVWKSYVHV   | HLA DRB1*15:02                                                 | <b>0.39201913</b> |
|  | 2388 | ASFYYVWKSYVHVVD  | HLA DRB1*15:02, HLA DRB1*16:02                                 | <b>0.15218183</b> |
|  | 2429 | GVRRSFYVYANGGKG  | HLA DRB1*15:02                                                 | -0.32869375       |
|  | 2430 | VRRSFYVYANGGKGF  | HLA DRB1*15:02, HLA DRB1*16:02                                 | -0.50732704       |
|  | 2431 | RRSFYVYANGGKGFC  | HLA DRB1*16:02                                                 | -0.20644744       |
|  | 2496 | VKNGSIHLYFDKAGQ  | HLA DRB1*15:01, HLA DRB1*15:02                                 | -0.69338588       |
|  | 2497 | KNGSIHLYFDKAGQK  | HLA DRB1*15:01, HLA DRB1*15:02                                 | -0.60597528       |
|  | 2498 | NGSIHLYFDKAGQKT  | HLA DRB1*15:01, HLA DRB1*15:02                                 | -0.53246273       |

|  |      |                  |                                                                   |                    |
|--|------|------------------|-------------------------------------------------------------------|--------------------|
|  | 2499 | GSIHLYFDKAGQKTY  | HLA DRB1*15:01, HLA DRB1*15:02                                    | -0.35732381        |
|  | 2516 | HSLSHFVNLDNLRAN  | HLA DRB1*16:02                                                    | -0.22981627        |
|  | 2517 | SLSHFVNLDNLRANN  | HLA DRB1*11:01, HLA DRB1*15:02, HLA DRB1*16:02                    | -0.17816212        |
|  | 2518 | LSHFVNLDNLRANNT  | HLA DRB1*11:01, HLA DRB1*12:02, HLA DRB1*15:02,<br>HLA DRB1*16:02 | -0.29350215        |
|  | 2519 | SHFVNLDNLRANNTK  | HLA DRB1*11:01, HLA DRB1*16:02                                    | -0.40477542        |
|  | 2585 | EVAVKMFDAYVNTFS  | HLA DRB1*15:01                                                    | -0.25130725        |
|  | 2587 | AVKMFDAYVNTFSST  | HLA DRB1*15:02                                                    | -0.32388736        |
|  | 2588 | VKMFDAYVNTFSSTF  | HLA DRB1*15:02                                                    | -0.42142796        |
|  | 2590 | MFDAYVNTFSSTFNV  | HLA DRB1*07:01                                                    | -0.41134871        |
|  | 2591 | FDAYVNTFSSTFNVP  | HLA DRB1*07:01                                                    | -0.56557317        |
|  | 2592 | DAYVNTFSSTFNVPM  | HLA DRB1*07:01                                                    | -0.50623878        |
|  | 2593 | AYVNTFSSTFNVPME  | HLA DRB1*07:01                                                    | -0.20604344        |
|  | 2594 | YVNTFSSTFNVPMEK  | HLA DRB1*07:01                                                    | -0.12732785        |
|  | 2595 | VNTFSSTFNVPMEKL  | HLA DRB1*07:01                                                    | -0.18682741        |
|  | 2602 | FNVPMEKLKTLVATA  | HLA DRB1*12:02                                                    | <b>0.16860267</b>  |
|  | 2603 | NVPMEKLKTLVATAE  | HLA DRB1*12:02                                                    | <b>0.32043407</b>  |
|  | 2608 | KLKTLVATAEAEELAK | HLA DRB1*07:01                                                    | <b>0.28758531</b>  |
|  | 2609 | LKTLVATAEAEELAKN | HLA DRB1*07:01                                                    | <b>0.28217656</b>  |
|  | 2626 | LDNVLSTFISAARQG  | HLA DRB1*16:02                                                    | <b>0.25499401</b>  |
|  | 2627 | DNVLSTFISAARQGF  | HLA DRB1*16:02                                                    | <b>0.060853447</b> |
|  | 2721 | LSEQLRKQIRSAACK  | HLA DRB1*11:01                                                    | -0.43971802        |
|  | 2722 | SEQLRKQIRSAACKN  | HLA DRB1*11:01                                                    | -0.37653178        |
|  | 2725 | LRKQIRSAACKNNLP  | HLA DRB1*11:01                                                    | -0.59829081        |
|  | 2726 | RKQIRSAACKNNLPF  | HLA DRB1*11:01                                                    | -0.40678367        |
|  | 2745 | ATTRQVVNVVTTKIA  | HLA DRB1*07:01                                                    | -0.31787192        |
|  | 2747 | TRQVVNVVTTKIALK  | HLA DRB1*07:01                                                    | <b>0.02810012</b>  |
|  | 2782 | FVAAIFYLITPVHVM  | HLA DRB1*07:01                                                    | -0.27424945        |
|  | 2783 | VAAIFYLITPVHVMS  | HLA DRB1*07:01, HLA DRB1*16:02                                    | -0.089830143       |
|  | 2784 | AAIFYLITPVHVMSK  | HLA DRB1*07:01, HLA DRB1*16:02                                    | -0.54022313        |
|  | 2785 | AIFYLITPVHVMSKH  | HLA DRB1*07:01                                                    | -0.76771484        |
|  | 2789 | LITPVHVMSKHTDFS  | HLA DRB1*11:01                                                    | -0.04426137        |
|  | 2789 | LITPVHVMSKHTDFS  | HLA DRB1*12:02                                                    | -0.13378443        |
|  | 2790 | ITPVHVMSKHTDFSS  | HLA DRB1*11:01, HLA DRB1*12:02                                    | -0.39904248        |
|  | 2800 | TDFSSEIIGYKAIDG  | HLA DRB1*15:01                                                    | -0.27549762        |
|  | 2801 | DFSSEIIGYKAIDGG  | HLA DRB1*15:01, HLA DRB1*15:02, HLA DRB1*16:02                    | -0.51805862        |
|  | 2802 | FSSEIIGYKAIDGGV  | HLA DRB1*15:01, HLA DRB1*15:02, HLA DRB1*16:02                    | -0.78718709        |
|  | 2803 | SSEIIGYKAIDGGVT  | HLA DRB1*15:01, HLA DRB1*15:02, HLA DRB1*16:02                    | -0.5932268         |
|  | 2804 | SEIIGYKAIDGGVTR  | HLA DRB1*15:01, HLA DRB1*15:02, HLA DRB1*16:02                    | -0.56631424        |
|  | 2805 | EIIGYKAIDGGVTRD  | HLA DRB1*15:01, HLA DRB1*16:02                                    | -0.72997846        |



|  |      |                 |                                                                   |                     |
|--|------|-----------------|-------------------------------------------------------------------|---------------------|
|  | 2806 | IIGYKAIDGGVTRDI | HLA DRB1*16:02                                                    | <b>0.27999202</b>   |
|  | 2854 | IAAVITREVGfVVPg | HLA DRB1*15:02                                                    | -0.0012576928       |
|  | 2877 | TNGDFLHFLPRVFSA | HLA DRB1*11:01                                                    | <b>0.11037918</b>   |
|  | 2878 | NGDFLHFLPRVFSAV | HLA DRB1*11:01                                                    | <b>0.31918441</b>   |
|  | 2879 | GDFLHFLPRVFSAVG | HLA DRB1*11:01                                                    | <b>0.58060762</b>   |
|  | 2890 | SAVGNICYTPSKLIE | HLA DRB1*07:01                                                    | <b>0.51851408</b>   |
|  | 2891 | AVGNICYTPSKLIEY | HLA DRB1*07:01                                                    | <b>0.31850723</b>   |
|  | 2892 | VGNICYTPSKLIEYT | HLA DRB1*07:01                                                    | <b>0.36940461</b>   |
|  | 2893 | GNICYTPSKLIEYTD | HLA DRB1*07:01                                                    | <b>0.17370758</b>   |
|  | 2897 | YTPSKLIEYDFATS  | HLA DRB1*15:01, HLA DRB1*15:02                                    | <b>0.20829641</b>   |
|  | 2898 | TPSKLIEYDFATSa  | HLA DRB1*15:01, HLA DRB1*15:02                                    | <b>0.4148902</b>    |
|  | 2899 | PSKLIEYDFATSAC  | HLA DRB1*15:01, HLA DRB1*15:02                                    | <b>0.17836648</b>   |
|  | 2900 | SKLIEYDFATSACV  | HLA DRB1*15:01                                                    | -0.7519447          |
|  | 2918 | ECTIFKDASGKVPY  | HLA DRB1*07:01                                                    | <b>0.0087233443</b> |
|  | 2949 | RPDTRYVLMdGSIIQ | HLA DRB1*16:02                                                    | -0.53836862         |
|  | 2950 | PDTRYVLMdGSIIQF | HLA DRB1*15:02, HLA DRB1*16:02                                    | -0.4605804          |
|  | 2951 | DTRYVLMdGSIIQFP | HLA DRB1*15:02, HLA DRB1*16:02                                    | -0.07450474         |
|  | 2952 | TRYVLMdGSIIQFPN | HLA DRB1*16:02                                                    | -0.4932638          |
|  | 2955 | VLMdGSIIQFPNTYL | HLA DRB1*15:01, HLA DRB1*15:02                                    | -0.33435363         |
|  | 2956 | LMDGSIIQFPNTYLE | HLA DRB1*15:01, HLA DRB1*15:02, HLA DRB1*16:02                    | -0.25075639         |
|  | 2957 | MDGSIIQFPNTYLEG | HLA DRB1*15:01, HLA DRB1*15:02, HLA DRB1*16:02                    | <b>0.21025374</b>   |
|  | 2958 | DGSIIQFPNTYLEGS | HLA DRB1*12:02, HLA DRB1*15:01, HLA DRB1*15:02,<br>HLA DRB1*16:02 | <b>0.087720744</b>  |
|  | 2959 | GSIIQFPNTYLEGSV | HLA DRB1*15:01, HLA DRB1*15:02,<br>HLA DRB1*16:02                 | <b>0.25912222</b>   |
|  | 2960 | SIIQFPNTYLEGSVR | HLA DRB1*15:01, HLA DRB1*15:02                                    | -0.78467881         |
|  | 2972 | SVRVVTTFDSEYCRH | HLA DRB1*15:01                                                    | -0.37523635         |
|  | 2973 | VRVVTTFDSEYCRHG | HLA DRB1*15:01, HLA DRB1*15:02                                    | -0.066934048        |
|  | 3006 | LNNDYYRSLPGVFCG | HLA DRB1*16:02                                                    | <b>0.39976925</b>   |
|  | 3007 | NNDYYRSLPGVFCGV | HLA DRB1*16:02                                                    | <b>0.32931549</b>   |
|  | 3008 | NDYYRSLPGVFCGVD | HLA DRB1*16:02                                                    | -0.41015989         |
|  | 3028 | TNMFTPLIQPIGALD | HLA DRB1*11:01                                                    | -0.065329836        |
|  | 3030 | MFTPLIQPIGALDIS | HLA DRB1*07:01                                                    | <b>0.15814274</b>   |
|  | 3031 | FTPLIQPIGALDISA | HLA DRB1*07:01, HLA DRB1*12:02                                    | <b>0.20744102</b>   |
|  | 3032 | TPLIQPIGALDISAS | HLA DRB1*07:01, HLA DRB1*12:02                                    | -0.086129717        |
|  | 3060 | LAYYFMRFRRAFGEY | HLA DRB1*11:01                                                    | -0.2289568          |
|  | 3061 | AYYFMRFRRAFGEYS | HLA DRB1*11:01                                                    | <b>0.58437182</b>   |
|  | 3094 | LTPVYSFLPGVYSVI | HLA DRB1*16:02                                                    | <b>0.56612589</b>   |
|  | 3095 | TPVYSFLPGVYSVIY | HLA DRB1*16:02                                                    | -0.046689717        |
|  | 3105 | YSVIYLYLTFYLTND | HLA DRB1*15:01                                                    | -0.17658548         |

|  |      |                 |                                                                                   |                     |
|--|------|-----------------|-----------------------------------------------------------------------------------|---------------------|
|  | 3148 | ISTKHFYWFFSNYLK | HLA DRB1*15:02, HLA DRB1*16:02                                                    | -0.34242601         |
|  | 3149 | STKHFYWFFSNYLKR | HLA DRB1*15:01, HLA DRB1*15:02, HLA DRB1*16:02                                    | -0.45241268         |
|  | 3150 | TKHFYWFFSNYLKRR | HLA DRB1*07:01, HLA DRB1*15:01, HLA DRB1*15:02,<br>HLA DRB1*16:02                 | -0.34583424         |
|  | 3151 | KHFYWFFSNYLKRRV | HLA DRB1*15:01, HLA DRB1*15:02, HLA DRB1*16:02                                    | -0.11907884         |
|  | 3209 | ALYNKYKYFSGAMDT | HLA DRB1*16:02                                                                    | -0.26436815         |
|  | 3210 | LYNKYKYFSGAMDTT | HLA DRB1*15:02, HLA DRB1*16:02                                                    | -0.49044619         |
|  | 3211 | YNKYKYFSGAMDTTS | HLA DRB1*15:02, HLA DRB1*16:02                                                    | -0.40499908         |
|  | 3212 | NKYKYFSGAMDTTSY | HLA DRB1*16:02                                                                    | <b>0.034925467</b>  |
|  | 3326 | NHNFLVQAGNVQLRV | HLA DRB1*15:02, HLA DRB1*16:02                                                    | -0.22907385         |
|  | 3359 | PKTPKYKFVRIQPGQ | HLA DRB1*07:01, HLA DRB1*11:01                                                    | -0.26182997         |
|  | 3360 | KTPKYKFVRIQPGQT | HLA DRB1*07:01, HLA DRB1*11:01                                                    | -0.42327254         |
|  | 3361 | TPKYKFVRIQPGQTF | HLA DRB1*07:01, HLA DRB1*11:01                                                    | -0.17899644         |
|  | 3362 | PKYKFVRIQPGQTFS | HLA DRB1*11:01                                                                    | -0.037425607        |
|  | 3363 | KYKFVRIQPGQTFSV | HLA DRB1*11:01                                                                    | <b>0.16151551</b>   |
|  | 3564 | SGVTFQSAVKRTIKG | HLA DRB1*11:01                                                                    | <b>0.1891356</b>    |
|  | 3565 | GVTFQSAVKRTIKGT | HLA DRB1*11:01                                                                    | <b>0.16802027</b>   |
|  | 3713 | NVLTLYKVYYGNAL  | HLA DRB1*15:02                                                                    | <b>0.17334471</b>   |
|  | 3714 | VLTLYKVYYGNALD  | HLA DRB1*15:01, HLA DRB1*15:02, HLA DRB1*16:02                                    | <b>0.17563228</b>   |
|  | 3715 | LTLVYKVYYGNALDQ | HLA DRB1*15:01, HLA DRB1*15:02, HLA DRB1*16:02                                    | -0.12812212         |
|  | 3716 | TLVYKVYYGNALDQA | HLA DRB1*15:01, HLA DRB1*15:02, HLA DRB1*16:02                                    | <b>0.0070755559</b> |
|  | 3717 | LVYKVYYGNALDQAI | HLA DRB1*15:01, HLA DRB1*15:02, HLA DRB1*16:02                                    | -0.019808209        |
|  | 3718 | VYKVYYGNALDQAIS | HLA DRB1*15:02                                                                    | <b>0.17021009</b>   |
|  | 3814 | LVSTQEFRYMNSQGL | HLA DRB1*07:01, HLA DRB1*15:02, HLA DRB1*16:02                                    | -0.039172088        |
|  | 3815 | VSTQEFRYMNSQGLL | HLA DRB1*07:01, HLA DRB1*15:02, HLA DRB1*16:02                                    | <b>0.097632046</b>  |
|  | 3816 | STQEFRYMNSQGLLP | HLA DRB1*07:01, HLA DRB1*12:02, HLA DRB1*15:01,<br>HLA DRB1*15:02, HLA DRB1*16:02 | -0.28198599         |
|  | 3817 | TQEFRYMNSQGLLPP | HLA DRB1*07:01, HLA DRB1*12:02, HLA DRB1*15:01,<br>HLA DRB1*15:02, HLA DRB1*16:02 | -0.41760878         |
|  | 3818 | QEFRYMNSQGLLPPK | HLA DRB1*07:01, HLA DRB1*12:02, HLA DRB1*15:01,<br>HLA DRB1*15:02, HLA DRB1*16:02 | -0.25437902         |
|  | 3819 | EFRYMNSQGLLPPKN | HLA DRB1*16:02                                                                    | -0.062325272        |
|  | 3833 | NSIDAFKLNILLGV  | HLA DRB1*11:01                                                                    | <b>0.34258395</b>   |
|  | 3834 | SIDAFKLNILLGVG  | HLA DRB1*11:01                                                                    | <b>0.23506756</b>   |
|  | 3835 | IDAFKLNILLGVGG  | HLA DRB1*11:01                                                                    | -0.10531173         |
|  | 3836 | DAFKLNILLGVGGK  | HLA DRB1*11:01                                                                    | <b>0.49673838</b>   |
|  | 3943 | AIASEFSSLPSYAAF | HLA DRB1*16:02                                                                    | -0.082021259        |
|  | 3944 | IASEFSSLPSYAAFA | HLA DRB1*15:02, HLA DRB1*16:02                                                    | <b>0.075448812</b>  |
|  | 3945 | ASEFSSLPSYAAFAT | HLA DRB1*15:02, HLA DRB1*16:02                                                    | <b>0.3972671</b>    |
|  | 3946 | SEFSSLPSYAAFATA | HLA DRB1*16:02                                                                    | <b>0.2211394</b>    |
|  | 3950 | SLPSYAAFATAQEAY | HLA DRB1*16:02                                                                    | <b>0.17363263</b>   |

|  |      |                  |                                                |                    |
|--|------|------------------|------------------------------------------------|--------------------|
|  | 3951 | LPSYAAFATAQEAYE  | HLA DRB1*16:02                                 | <b>0.05175581</b>  |
|  | 3959 | TAQEAYEQAVANGDS  | HLA DRB1*07:01                                 | -0.15963941        |
|  | 3960 | AQEAYEQAVANGDSE  | HLA DRB1*07:01                                 | -0.46428452        |
|  | 3961 | QEAYEQAVANGDSEV  | HLA DRB1*07:01                                 | -0.54067076        |
|  | 3974 | EVVLKKLKKSLNVAK  | HLA DRB1*11:01                                 | <b>0.6329412</b>   |
|  | 4029 | MQTMLFTMLRKLDND  | HLA DRB1*11:01                                 | -0.20734393        |
|  | 4030 | QTMFLTMLRKLDNDA  | HLA DRB1*11:01                                 | -0.087059221       |
|  | 4031 | TMLFTMLRKLDNDAL  | HLA DRB1*11:01                                 | -0.04278137        |
|  | 4068 | AKLMVVIPDYNTYKN  | HLA DRB1*15:01                                 | -0.42757332        |
|  | 4103 | DADSKIVQLSEISMD  | HLA DRB1*12:02                                 | -0.61372399        |
|  | 4104 | ADSKIVQLSEISMDN  | HLA DRB1*12:02                                 | -0.76106239        |
|  | 4105 | DSKIVQLSEISMDNS  | HLA DRB1*12:02                                 | -0.69078384        |
|  | 4106 | SKIVQLSEISMDNSP  | HLA DRB1*12:02                                 | -1.1295165         |
|  | 4124 | WPLIVTALRANSVAVK | HLA DRB1*11:01, HLA DRB1*12:02                 | <b>0.78569358</b>  |
|  | 4125 | PLIVTALRANSVAVKL | HLA DRB1*12:02                                 | <b>0.63818085</b>  |
|  | 4128 | VTALRANSVAVKLQNN | HLA DRB1*07:01                                 | <b>0.41017385</b>  |
|  | 4164 | TDDNALAYYNTTKGG  | HLA DRB1*15:01, HLA DRB1*15:02                 | -0.61761105        |
|  | 4165 | DDNALAYYNTTKGGR  | HLA DRB1*15:01, HLA DRB1*15:02, HLA DRB1*16:02 | -0.42845902        |
|  | 4166 | DNALAYYNTTKGGRF  | HLA DRB1*15:01, HLA DRB1*15:02, HLA DRB1*16:02 | -0.74369435        |
|  | 4167 | NALAYYNTTKGGRFV  | HLA DRB1*07:01, HLA DRB1*15:01, HLA DRB1*15:02 | -0.4713522         |
|  | 4168 | ALAYYNTTKGGRFVL  | HLA DRB1*07:01                                 | -0.47916381        |
|  | 4169 | LAYYNTTKGGRFVLA  | HLA DRB1*07:01                                 | -0.057237948       |
|  | 4189 | QDLKWARFPKSDGTG  | HLA DRB1*11:01                                 | -0.65990954        |
|  | 4190 | DLKWARFPKSDGTGT  | HLA DRB1*11:01                                 | -0.78591897        |
|  | 4222 | GPKVKYLYFIKGLNN  | HLA DRB1*11:01                                 | -0.16032734        |
|  | 4223 | PKVKYLYFIKGLNNL  | HLA DRB1*11:01                                 | <b>0.16674258</b>  |
|  | 4224 | KVKYLYFIKGLNNLN  | HLA DRB1*11:01                                 | -0.0030323981      |
|  | 4242 | VLGSLAATVRLQAGN  | HLA DRB1*11:01                                 | <b>0.12826589</b>  |
|  | 4243 | LGSLAATVRLQAGNA  | HLA DRB1*11:01                                 | <b>0.10055086</b>  |
|  | 4244 | GSLAATVRLQAGNAT  | HLA DRB1*11:01                                 | <b>0.064312226</b> |
|  | 4262 | ANSTVLSFCAFAVDA  | HLA DRB1*15:01                                 | -0.0537201         |
|  | 4263 | NSTVLSFCAFAVDAA  | HLA DRB1*15:01, HLA DRB1*15:02                 | <b>0.048452802</b> |
|  | 4272 | FAVDAAKAYKDYLAS  | HLA DRB1*15:01                                 | <b>0.3387717</b>   |
|  | 4273 | AVDAAKAYKDYLASG  | HLA DRB1*15:01                                 | <b>0.22276241</b>  |
|  | 4274 | VDAAKAYKDYLASGG  | HLA DRB1*15:01, HLA DRB1*15:02                 | -0.11036117        |
|  | 4275 | DAAKAYKDYLASGGQ  | HLA DRB1*15:01                                 | -0.13857939        |
|  | 4276 | AAKAYKDYLASGGQP  | HLA DRB1*15:02                                 | -0.050270034       |
|  | 4277 | AKAYKDYLASGGQPI  | HLA DRB1*07:01, HLA DRB1*15:02                 | <b>0.27241329</b>  |
|  | 4278 | KAYKDYLASGGQPIT  | HLA DRB1*07:01, HLA DRB1*16:02                 | <b>0.19650355</b>  |
|  | 4279 | AYKDYLASGGQPITN  | HLA DRB1*07:01, HLA DRB1*15:02, HLA DRB1*16:02 | <b>0.01567761</b>  |

|  |      |                 |                                                                   |                    |
|--|------|-----------------|-------------------------------------------------------------------|--------------------|
|  | 4280 | YKDYLASGGQPITNC | HLA DRB1*07:01, HLA DRB1*16:02                                    | <b>0.14080429</b>  |
|  | 4281 | KDYLASGGQPITNCV | HLA DRB1*07:01                                                    | <b>0.14655744</b>  |
|  | 4345 | LKGKYVQIPTTCAND | HLA DRB1*11:01, HLA DRB1*16:02                                    | -0.22354251        |
|  | 4346 | KGKYVQIPTTCANDP | HLA DRB1*11:01, HLA DRB1*16:02                                    | -0.3406529         |
|  | 4418 | TSTDVVYRAFDIYND | HLA DRB1*15:01, HLA DRB1*15:02                                    | <b>0.041567617</b> |
|  | 4422 | VVYRAFDIYNDKVAG | HLA DRB1*15:01, HLA DRB1*15:02                                    | <b>0.072694755</b> |
|  | 4423 | VYRAFDIYNDKVAGF | HLA DRB1*15:01, HLA DRB1*15:02                                    | -0.12274593        |
|  | 4424 | YRAFDIYNDKVAGFA | HLA DRB1*15:01, HLA DRB1*15:02, HLA DRB1*16:02                    | <b>0.089073011</b> |
|  | 4425 | RAFDIYNDKVAGFAK | HLA DRB1*15:01, HLA DRB1*15:02                                    | <b>0.018452115</b> |
|  | 4456 | NLIDSYFVVKRHTFS | HLA DRB1*11:01                                                    | <b>0.19160503</b>  |
|  | 4457 | LIDSYFVVKRHTFSN | HLA DRB1*11:01, HLA DRB1*12:02                                    | <b>0.13041491</b>  |
|  | 4458 | IDSYFVVKRHTFSNY | HLA DRB1*11:01, HLA DRB1*12:02                                    | <b>0.1870334</b>   |
|  | 4459 | DSYFVVKRHTFSNYQ | HLA DRB1*11:01                                                    | <b>0.17255265</b>  |
|  | 4551 | KKDWYDFVENPDILR | HLA DRB1*16:02                                                    | <b>0.077198278</b> |
|  | 4552 | KDWYDFVENPDILRV | HLA DRB1*16:02                                                    | <b>0.10212444</b>  |
|  | 4559 | ENPDILRVYANLGER | HLA DRB1*12:02, HLA DRB1*15:01, HLA DRB1*15:02,<br>HLA DRB1*16:02 | <b>0.011725622</b> |
|  | 4560 | NPDILRVYANLGERV | HLA DRB1*12:02, HLA DRB1*15:01, HLA DRB1*15:02,<br>HLA DRB1*16:02 | <b>0.22993566</b>  |
|  | 4561 | PDILRVYANLGERVR | HLA DRB1*12:02, HLA DRB1*15:01, HLA DRB1*15:02,<br>HLA DRB1*16:02 | <b>0.26161469</b>  |
|  | 4562 | DILRVYANLGERVRQ | HLA DRB1*15:01, HLA DRB1*15:02                                    | <b>0.19512384</b>  |
|  | 4610 | DFGDFIQTPGSGVP  | HLA DRB1*07:01                                                    | -0.15132234        |
|  | 4611 | FGDFIQTPGSGVPV  | HLA DRB1*07:01                                                    | -0.18966827        |
|  | 4612 | GDFIQTPGSGVPVV  | HLA DRB1*07:01                                                    | -0.13007353        |
|  | 4622 | GVPVVDYYSLLMPI  | HLA DRB1*15:01                                                    | -0.054402262       |
|  | 4634 | MPILTLTRALTAESH | HLA DRB1*07:01                                                    | <b>0.28242312</b>  |
|  | 4675 | FDRYFKYWDQTYHPN | HLA DRB1*15:02                                                    | <b>0.24811396</b>  |
|  | 4727 | VDGVPFVSTGYHFR  | HLA DRB1*07:01, HLA DRB1*16:02                                    | <b>0.11480612</b>  |
|  | 4728 | DGVPFVSTGYHFRE  | HLA DRB1*07:01, HLA DRB1*15:02, HLA DRB1*16:02                    | <b>0.03879744</b>  |
|  | 4729 | GVPFVSTGYHFREL  | HLA DRB1*07:01, HLA DRB1*15:02, HLA DRB1*16:02                    | <b>0.081607683</b> |
|  | 4730 | VVPFVSTGYHFREL  | HLA DRB1*07:01                                                    | <b>0.23177467</b>  |
|  | 4758 | LSFKELLVYAADPAM | HLA DRB1*15:01, HLA DRB1*15:02                                    | -0.077004067       |
|  | 4759 | SFKELLVYAADPAMH | HLA DRB1*15:01, HLA DRB1*15:02, HLA DRB1*16:02                    | -0.27908132        |
|  | 4760 | FKELLVYAADPAMHA | HLA DRB1*15:01, HLA DRB1*15:02, HLA DRB1*16:02                    | <b>0.11371587</b>  |
|  | 4761 | KELLVYAADPAMHAA | HLA DRB1*15:01, HLA DRB1*15:02, HLA DRB1*16:02                    | <b>0.22582922</b>  |
|  | 4768 | ADPAMHAASGNLLLD | HLA DRB1*07:01                                                    | -0.68330658        |
|  | 4769 | DPAMHAASGNLLDK  | HLA DRB1*07:01                                                    | -0.58368375        |
|  | 4795 | NNVAFQTVKPGNFNK | HLA DRB1*07:01                                                    | -0.11573911        |
|  | 4796 | NVAFQTVKPGNFNKD | HLA DRB1*07:01                                                    | -0.10606629        |

|  |      |                  |                                                                   |                   |
|--|------|------------------|-------------------------------------------------------------------|-------------------|
|  | 4807 | FNKDFYDFAVSKGFF  | HLA DRB1*07:01                                                    | -0.40289788       |
|  | 4808 | NKDFYDFAVSKGFFK  | HLA DRB1*07:01                                                    | -0.079483904      |
|  | 4809 | KDFYDFAVSKGFFKE  | HLA DRB1*07:01                                                    | -0.14047237       |
|  | 4817 | SKGFFKEGSSVELKH  | HLA DRB1*07:01                                                    | -0.67956316       |
|  | 4818 | KGFFKEGSSVELKHF  | HLA DRB1*07:01                                                    | -0.52497763       |
|  | 4829 | LKHFFFAQDGNAAIS  | HLA DRB1*16:02                                                    | <b>0.26791847</b> |
|  | 4830 | KHFFFAQDGNAAISD  | HLA DRB1*15:02, HLA DRB1*16:02                                    | <b>0.44008259</b> |
|  | 4886 | IVNNLDKSAGFPFNK  | HLA DRB1*07:01                                                    | -0.40376859       |
|  | 4915 | DQDALFAYTKRNVIP  | HLA DRB1*11:01                                                    | -0.3368985        |
|  | 4916 | QDALFAYTKRNVPT   | HLA DRB1*11:01                                                    | -0.060695981      |
|  | 4917 | DALFAYTKRNVPTI   | HLA DRB1*11:01                                                    | -0.26013623       |
|  | 4932 | TQMNLKYAISAKNRA  | HLA DRB1*11:01                                                    | <b>0.35183292</b> |
|  | 4933 | QMNLKYAISAKNRAR  | HLA DRB1*11:01                                                    | <b>0.40443361</b> |
|  | 4934 | MNLKYAISAKNRART  | HLA DRB1*11:01                                                    | <b>0.40189009</b> |
|  | 4935 | NLKYAISAKNRARTV  | HLA DRB1*11:01                                                    | <b>0.59384444</b> |
|  | 4936 | LKYAISAKNRARTVA  | HLA DRB1*11:01                                                    | <b>0.65441232</b> |
|  | 4937 | KY AISAKNRARTVAG | HLA DRB1*11:01                                                    | <b>0.58340402</b> |
|  | 4965 | QKLLKSIAATRGATV  | HLA DRB1*07:01                                                    | <b>0.2049577</b>  |
|  | 4966 | KLLKSIAATRGATVV  | HLA DRB1*07:01                                                    | <b>0.40943023</b> |
|  | 4967 | LLKSIAATRGATVVI  | HLA DRB1*07:01                                                    | <b>0.39407314</b> |
|  | 4968 | LKSIAATRGATVVIG  | HLA DRB1*07:01                                                    | <b>0.51630525</b> |
|  | 4969 | KSIAATRGATVVIGT  | HLA DRB1*07:01                                                    | <b>0.62202121</b> |
|  | 5018 | MPNMLRIMASLVLAR  | HLA DRB1*12:02, HLA DRB1*15:01, HLA DRB1*15:02,<br>HLA DRB1*16:02 | <b>0.32014953</b> |
|  | 5019 | PNMLRIMASLVLARK  | HLA DRB1*12:02, HLA DRB1*15:01, HLA DRB1*15:02,<br>HLA DRB1*16:02 | <b>0.39136883</b> |
|  | 5020 | NMLRIMASLVLARKH  | HLA DRB1*15:01, HLA DRB1*15:02, HLA DRB1*16:02                    | <b>0.13368254</b> |
|  | 5093 | TANVNALLSTDGNKI  | HLA DRB1*07:01                                                    | -0.1135887        |
|  | 5094 | ANVNALLSTDGNKIA  | HLA DRB1*07:01                                                    | -0.30390308       |
|  | 5095 | NVNALLSTDGNKIAD  | HLA DRB1*07:01                                                    | -0.021819874      |
|  | 5096 | VNALLSTDGNKIADK  | HLA DRB1*07:01, HLA DRB1*15:02, HLA DRB1*16:02                    | <b>0.22113402</b> |
|  | 5097 | NALLSTDGNKIADKY  | HLA DRB1*07:01                                                    | <b>0.20149438</b> |
|  | 5106 | KIADKYVRNLQHRLY  | HLA DRB1*12:02                                                    | -0.23107785       |
|  | 5107 | IADKYVRNLQHRLYE  | HLA DRB1*12:02                                                    | -0.31784011       |
|  | 5108 | ADKYVRNLQHRLYEC  | HLA DRB1*12:02                                                    | -0.30902884       |
|  | 5109 | DKYVRNLQHRLYECL  | HLA DRB1*12:02                                                    | -0.27625912       |
|  | 5115 | LQHRLYECLYRNRDV  | HLA DRB1*11:01                                                    | -0.18997364       |
|  | 5116 | QHRLYECLYRNRDVD  | HLA DRB1*11:01                                                    | -0.11496807       |
|  | 5117 | HRLYECLYRNRDVT   | HLA DRB1*11:01                                                    | -0.14108854       |
|  | 5118 | RLYECLYRNRDVDT   | HLA DRB1*11:01                                                    | -0.30582316       |

|  |      |                 |                                                                                   |                    |
|--|------|-----------------|-----------------------------------------------------------------------------------|--------------------|
|  | 5132 | DFVNEFYAYLRKHFS | HLA DRB1*11:01                                                                    | -0.20027092        |
|  | 5133 | FVNEFYAYLRKHFSM | HLA DRB1*11:01                                                                    | -0.63092501        |
|  | 5134 | VNEFYAYLRKHFSMM | HLA DRB1*11:01                                                                    | -0.52175242        |
|  | 5135 | NEFYAYLRKHFSMMI | HLA DRB1*11:01                                                                    | -0.26378918        |
|  | 5136 | EFYAYLRKHFSMMIL | HLA DRB1*11:01                                                                    | -0.23100353        |
|  | 5150 | LSDDAVVCFNSTYAS | HLA DRB1*15:01, HLA DRB1*15:02                                                    | <b>0.034561966</b> |
|  | 5151 | SDDAVVCFNSTYASQ | HLA DRB1*15:01, HLA DRB1*15:02, HLA DRB1*16:02                                    | <b>0.026386468</b> |
|  | 5152 | DDAVVCFNSTYASQG | HLA DRB1*15:01, HLA DRB1*15:02, HLA DRB1*16:02                                    | -0.088754083       |
|  | 5153 | DAVVCFNSTYASQGL | HLA DRB1*15:01                                                                    | <b>0.33611739</b>  |
|  | 5164 | SQGLVASIKNFKSVL | HLA DRB1*15:01                                                                    | <b>0.37231794</b>  |
|  | 5165 | QGLVASIKNFKSVLY | HLA DRB1*12:02, HLA DRB1*15:01                                                    | <b>0.24848213</b>  |
|  | 5166 | GLVASIKNFKSVLYY | HLA DRB1*12:02, HLA DRB1*15:01, HLA DRB1*15:02,<br>HLA DRB1*16:02                 | <b>0.43106149</b>  |
|  | 5167 | LVASIKNFKSVLYYQ | HLA DRB1*12:02, HLA DRB1*15:01, HLA DRB1*15:02,<br>HLA DRB1*16:02                 | <b>0.093707023</b> |
|  | 5168 | VASIKNFKSVLYYQN | HLA DRB1*12:02, HLA DRB1*15:01, HLA DRB1*15:02,<br>HLA DRB1*16:02                 | <b>0.29825337</b>  |
|  | 5169 | ASIKNFKSVLYYQNN | HLA DRB1*12:02, HLA DRB1*15:01, HLA DRB1*15:02,<br>HLA DRB1*16:02                 | <b>0.25775961</b>  |
|  | 5172 | KNFKSVLYYQNNVFM | HLA DRB1*15:01, HLA DRB1*15:02                                                    | -0.014358134       |
|  | 5173 | NFKSVLYYQNNVFMS | HLA DRB1*15:01, HLA DRB1*15:02                                                    | <b>0.096870191</b> |
|  | 5174 | FKSVLYYQNNVFMS  | HLA DRB1*15:01, HLA DRB1*15:02, HLA DRB1*16:02                                    | -0.00094937127     |
|  | 5175 | KSVLYYQNNVFMS   | HLA DRB1*15:01, HLA DRB1*15:02, HLA DRB1*16:02                                    | <b>0.13527738</b>  |
|  | 5234 | CFVDDIVKTDGTLMI | HLA DRB1*07:01                                                                    | -0.88380089        |
|  | 5235 | FVDDIVKTDGTLMI  | HLA DRB1*07:01                                                                    | -0.90124302        |
|  | 5236 | VDDIVKTDGTLMI   | HLA DRB1*07:01                                                                    | -0.84103604        |
|  | 5237 | DDIVKTDGTLMI    | HLA DRB1*07:01                                                                    | -1.1896573         |
|  | 5244 | GTLMIERFVSLAIDA | HLA DRB1*15:01, HLA DRB1*15:02                                                    | -0.82427027        |
|  | 5245 | TLMIERFVSLAIDAY | HLA DRB1*15:01, HLA DRB1*15:02                                                    | -0.65076675        |
|  | 5362 | SHKLVLVSNPYVCNA | HLA DRB1*15:02                                                                    | -0.35281523        |
|  | 5410 | NGQVFGLYKNTCVGS | HLA DRB1*15:02                                                                    | -0.2834386         |
|  | 5411 | GQVFGLYKNTCVGSD | HLA DRB1*15:01, HLA DRB1*15:02                                                    | <b>0.12639966</b>  |
|  | 5449 | TCTERLKLFAAETLK | HLA DRB1*15:01, HLA DRB1*15:02, HLA DRB1*16:02                                    | -0.27901465        |
|  | 5450 | CTERLKLFAAETLKA | HLA DRB1*12:02, HLA DRB1*15:01, HLA DRB1*15:02,<br>HLA DRB1*16:02                 | -0.10920914        |
|  | 5451 | TERLKLFAAETLKAT | HLA DRB1*07:01, HLA DRB1*12:02, HLA DRB1*15:01,<br>HLA DRB1*15:02, HLA DRB1*16:02 | <b>0.013340883</b> |
|  | 5452 | ERLKLFAAETLKATE | HLA DRB1*15:01, HLA DRB1*15:02, HLA DRB1*16:02                                    | <b>0.027634477</b> |
|  | 5465 | TEETFKLSYGIATVR | HLA DRB1*07:01                                                                    | -0.15300691        |
|  | 5466 | EETFKLSYGIATVRE | HLA DRB1*07:01                                                                    | -0.13727134        |
|  | 5470 | KLSYGIATVREVLSD | HLA DRB1*07:01                                                                    | <b>0.043163927</b> |

|  |      |                  |                                                                   |                   |
|--|------|------------------|-------------------------------------------------------------------|-------------------|
|  | 5503 | NYVFTGYRVTKNSKV  | HLA DRB1*07:01                                                    | -0.78894867       |
|  | 5504 | YVFTGYRVTKNSKVQ  | HLA DRB1*07:01, HLA DRB1*15:02, HLA DRB1*16:02                    | -0.76041811       |
|  | 5505 | VFTGYRVTKNSKVQI  | HLA DRB1*07:01, HLA DRB1*15:02, HLA DRB1*16:02                    | -0.70114021       |
|  | 5506 | FTGYRVTKNSKVQIG  | HLA DRB1*07:01, HLA DRB1*15:02, HLA DRB1*16:02                    | -0.7629068        |
|  | 5507 | TGYRVTKNSKVQIGE  | HLA DRB1*07:01, HLA DRB1*15:02, HLA DRB1*16:02                    | -0.81396755       |
|  | 5508 | GYRVTKNSKVQIGEY  | HLA DRB1*07:01                                                    | -0.53448585       |
|  | 5529 | YGDAVVYRGTTTTYKL | HLA DRB1*07:01                                                    | -0.36532217       |
|  | 5530 | GDAVVYRGTTTTYKLN | HLA DRB1*07:01                                                    | -0.36697071       |
|  | 5531 | DAVVYRGTTTTYKLV  | HLA DRB1*07:01, HLA DRB1*16:02                                    | -0.0019186367     |
|  | 5532 | AVVYRGTTTTYKLVNG | HLA DRB1*07:01, HLA DRB1*15:02, HLA DRB1*16:02                    | -0.021410949      |
|  | 5533 | VVYRGTTTTYKLVNGD | HLA DRB1*07:01                                                    | -0.1363368        |
|  | 5534 | VYRGTTTTYKLVNGDY | HLA DRB1*07:01                                                    | -0.16206678       |
|  | 5542 | KLVNGDYFVLTSHTV  | HLA DRB1*16:02                                                    | -0.15056949       |
|  | 5543 | LVNGDYFVLTSHTVM  | HLA DRB1*15:02, HLA DRB1*16:02                                    | -0.36042586       |
|  | 5544 | NVNGDYFVLTSHTVMP | HLA DRB1*07:01, HLA DRB1*15:02, HLA DRB1*16:02                    | -0.43765126       |
|  | 5545 | VGDYFVLTSHTVMPL  | HLA DRB1*07:01, HLA DRB1*15:02, HLA DRB1*16:02                    | -0.17329827       |
|  | 5546 | GDYFVLTSHTVMPLS  | HLA DRB1*15:02, HLA DRB1*16:02                                    | -0.31357192       |
|  | 5553 | SHTVMPLSAPTLVPQ  | HLA DRB1*12:02, HLA DRB1*15:01                                    | -0.54038934       |
|  | 5594 | QKVGMMQKYSTLQGPP | HLA DRB1*15:01, HLA DRB1*15:02                                    | -0.81414195       |
|  | 5595 | KVGMMQKYSTLQGPPG | HLA DRB1*15:01, HLA DRB1*15:02                                    | -0.67029702       |
|  | 5596 | VGMMQKYSTLQGPPGT | HLA DRB1*15:01                                                    | -0.73912984       |
|  | 5598 | MQKYSTLQGPPGTGK  | HLA DRB1*16:02                                                    | -0.64959807       |
|  | 5616 | AIGLALYYPSARIVY  | HLA DRB1*15:01                                                    | <b>0.20585782</b> |
|  | 5617 | IGLALYYPSARIVYT  | HLA DRB1*15:01                                                    | <b>0.18608175</b> |
|  | 5666 | CFDKFKVNSTLEQYV  | HLA DRB1*11:01                                                    | -0.093789713      |
|  | 5667 | FDKFKVNSTLEQYVF  | HLA DRB1*11:01                                                    | -0.24532673       |
|  | 5690 | TTADIVVFDEISMAT  | HLA DRB1*15:01                                                    | -0.41762994       |
|  | 5691 | TADIVVFDEISMATN  | HLA DRB1*15:01, HLA DRB1*15:02                                    | -0.42912485       |
|  | 5696 | VFDEISMATNYDLSV  | HLA DRB1*15:01, HLA DRB1*15:02                                    | -0.59626637       |
|  | 5697 | FDEISMATNYDLSV   | HLA DRB1*15:01, HLA DRB1*15:02                                    | -0.50310201       |
|  | 5716 | RAKHVYIGDPAQLP   | HLA DRB1*16:02                                                    | -0.18755018       |
|  | 5717 | AKHVYIGDPAQLPA   | HLA DRB1*11:01, HLA DRB1*16:02                                    | <b>0.16727452</b> |
|  | 5718 | KHVYIGDPAQLPAP   | HLA DRB1*16:02                                                    | -0.3181297        |
|  | 5767 | RCPAEIVDTVSALVY  | HLA DRB1*07:01                                                    | -0.20882629       |
|  | 5768 | CPAEIVDTVSALVYD  | HLA DRB1*07:01, HLA DRB1*15:02                                    | -0.24004956       |
|  | 5769 | PAEIVDTVSALVYDN  | HLA DRB1*07:01, HLA DRB1*15:01, HLA DRB1*15:02,<br>HLA DRB1*16:02 | -0.31287444       |
|  | 5770 | AEIVDTVSALVYDNK  | HLA DRB1*07:01, HLA DRB1*12:02                                    | -0.46019668       |
|  | 5774 | DTVSALVYDNKLKAH  | HLA DRB1*11:01                                                    | -0.044191882      |
|  | 5775 | TVSALVYDNKLKAHK  | HLA DRB1*11:01                                                    | <b>0.35165561</b> |

|  |      |                  |                                                                                   |                     |
|--|------|------------------|-----------------------------------------------------------------------------------|---------------------|
|  | 5776 | VSAIVYDNKLKAHKD  | HLA DRB1*11:01                                                                    | <b>0.25601688</b>   |
|  | 5777 | SALVYDNKLKAHKDK  | HLA DRB1*11:01                                                                    | <b>0.49102369</b>   |
|  | 5795 | CFKMFYKGVITHDVS  | HLA DRB1*07:01                                                                    | -0.59974749         |
|  | 5796 | FKMFYKGVITHDVSS  | HLA DRB1*07:01                                                                    | -0.49172757         |
|  | 5797 | KMFYKGVITHDVSSA  | HLA DRB1*07:01, HLA DRB1*16:02                                                    | -0.45539364         |
|  | 5814 | RPQIGVVREFLTRNP  | HLA DRB1*12:02                                                                    | -0.48461916         |
|  | 5830 | WRKAVFISPYNSQNA  | HLA DRB1*15:01                                                                    | <b>0.23383292</b>   |
|  | 5831 | RKAVFISPYNSQNAV  | HLA DRB1*15:01, HLA DRB1*15:02                                                    | <b>0.53933214</b>   |
|  | 5832 | KAVFISPYNSQNAVA  | HLA DRB1*15:01, HLA DRB1*15:02, HLA DRB1*16:02                                    | <b>0.4720961</b>    |
|  | 5833 | AVFISPYNSQNAVAS  | HLA DRB1*15:01, HLA DRB1*15:02, HLA DRB1*16:02                                    | <b>0.53704543</b>   |
|  | 5834 | VFISPYNSQNAVASK  | HLA DRB1*15:01, HLA DRB1*15:02, HLA DRB1*16:02                                    | <b>0.22363359</b>   |
|  | 5835 | FISPYNSQNAVASKI  | HLA DRB1*15:01                                                                    | <b>0.043858555</b>  |
|  | 5844 | AVASKILGLPTQTVDD | HLA DRB1*12:02                                                                    | -0.07832972         |
|  | 5845 | VASKILGLPTQTVDS  | HLA DRB1*12:02, HLA DRB1*15:01, HLA DRB1*15:02,<br>HLA DRB1*16:02                 | <b>0.015678357</b>  |
|  | 5846 | ASKILGLPTQTVDS   | HLA DRB1*12:02, HLA DRB1*15:01, HLA DRB1*15:02,<br>HLA DRB1*16:02                 | -0.12146879         |
|  | 5847 | SKILGLPTQTVDSQ   | HLA DRB1*12:02                                                                    | -0.097107987        |
|  | 5916 | IPRRNVATLQAENV   | HLA DRB1*12:02                                                                    | -0.11088735         |
|  | 5917 | PRRRNVATLQAENVG  | HLA DRB1*12:02                                                                    | <b>0.0014152941</b> |
|  | 5918 | RRNVATLQAENVGL   | HLA DRB1*12:02                                                                    | <b>0.22897269</b>   |
|  | 5986 | KMNYQVNGYPNMFIT  | HLA DRB1*15:01, HLA DRB1*15:02                                                    | -0.32066822         |
|  | 5987 | MNYQVNGYPNMFITR  | HLA DRB1*15:01, HLA DRB1*15:02                                                    | -0.1812924          |
|  | 5988 | NYQVNGYPNMFITRE  | HLA DRB1*15:01, HLA DRB1*15:02, HLA DRB1*16:02                                    | -0.22008393         |
|  | 5989 | YQVNGYPNMFITREE  | HLA DRB1*15:01, HLA DRB1*15:02                                                    | -0.1390682          |
|  | 6000 | TREEAIRHVRWIGF   | HLA DRB1*12:02                                                                    | <b>0.17190051</b>   |
|  | 6001 | REEAIRHVRWIGFD   | HLA DRB1*12:02, HLA DRB1*15:01, HLA DRB1*15:02                                    | <b>0.11715273</b>   |
|  | 6002 | EEAIRHVRWIGFDV   | HLA DRB1*12:02, HLA DRB1*15:01, HLA DRB1*15:02<br>HLA DRB1*16:02                  | <b>0.42312165</b>   |
|  | 6003 | EAIRHVRWIGFDVE   | HLA DRB1*15:01, HLA DRB1*15:02                                                    | <b>0.23743019</b>   |
|  | 6004 | AIRHVRWIGFDVEG   | HLA DRB1*15:01, HLA DRB1*15:02                                                    | <b>0.2893765</b>    |
|  | 6005 | IRHVRWIGFDVEGC   | HLA DRB1*15:01, HLA DRB1*15:02                                                    | <b>0.59401836</b>   |
|  | 6006 | RHVRWIGFDVEGCH   | HLA DRB1*15:01                                                                    | <b>0.18377954</b>   |
|  | 6038 | TGVNLVAVPTGYVDT  | HLA DRB1*15:01, HLA DRB1*15:02, HLA DRB1*16:02                                    | -0.25176918         |
|  | 6039 | GVNLVAVPTGYVDTP  | HLA DRB1*07:01, HLA DRB1*12:02, HLA DRB1*15:01,<br>HLA DRB1*15:02, HLA DRB1*16:02 | -0.46784679         |
|  | 6055 | NTDFSRVSAKPPGD   | HLA DRB1*07:01                                                                    | -0.23055851         |
|  | 6066 | PPGDQFKHLIPLMYK  | HLA DRB1*12:02                                                                    | -0.79302192         |
|  | 6067 | PGDQFKHLIPLMYKG  | HLA DRB1*12:02                                                                    | -0.66712494         |
|  | 6068 | GDQFKHLIPLMYKGL  | HLA DRB1*12:02                                                                    | -0.50207002         |
|  | 6069 | DQFKHLIPLMYKGLP  | HLA DRB1*12:02                                                                    | -0.77532188         |



|  |      |                 |                                                                   |                     |
|--|------|-----------------|-------------------------------------------------------------------|---------------------|
|  | 6087 | VRKIVQMLSDLTKN  | HLA DRB1*12:02, HLA DRB1*15:01, HLA DRB1*15:02,<br>HLA DRB1*16:02 | -0.08846654         |
|  | 6260 | PKAICVPPQADVEWK | HLA DRB1*12:02                                                    | <b>0.11520704</b>   |
|  | 6268 | QADVEWKFYDAQPCS | HLA DRB1*15:02, HLA DRB1*16:02                                    | <b>0.093446735</b>  |
|  | 6269 | ADVEWKFYDAQPCSD | HLA DRB1*15:01, HLA DRB1*15:02, HLA DRB1*16:02                    | <b>0.10240558</b>   |
|  | 6270 | DVEWKFYDAQPCSDK | HLA DRB1*15:01, HLA DRB1*15:02, HLA DRB1*16:02                    | <b>0.10088207</b>   |
|  | 6271 | VEWKFYDAQPCSDKA | HLA DRB1*15:02, HLA DRB1*16:02                                    | <b>0.23032418</b>   |
|  | 6288 | IEELFYSYATHSDKF | HLA DRB1*15:02                                                    | -0.42593106         |
|  | 6289 | EELFYSYATHSDKFT | HLA DRB1*15:02                                                    | -0.32219001         |
|  | 6309 | FWNCNVDRYPANSIV | HLA DRB1*15:01, HLA DRB1*15:02                                    | <b>0.05024018</b>   |
|  | 6310 | WNCNVDRYPANSIVC | HLA DRB1*15:01, HLA DRB1*15:02                                    | <b>0.0029701117</b> |
|  | 6311 | NCNVDRYPANSIVCR | HLA DRB1*15:01, HLA DRB1*15:02                                    | -0.037843374        |
|  | 6356 | FDKSAFVNLKQLPFF | HLA DRB1*12:02                                                    | -0.65316442         |
|  | 6357 | DKSAFVNLKQLPFFY | HLA DRB1*12:02                                                    | -0.57806402         |
|  | 6358 | KSAFVNLKQLPFFYY | HLA DRB1*12:02                                                    | -0.37678307         |
|  | 6359 | SAFVNLKQLPFFYYS | HLA DRB1*12:02                                                    | -0.60794426         |
|  | 6364 | LKQLPFFYSDSPCE  | HLA DRB1*15:02                                                    | -0.84820875         |
|  | 6365 | KQLPFFYSDSPCES  | HLA DRB1*15:01, HLA DRB1*15:02                                    | -0.74682862         |
|  | 6366 | QLPFFYSDSPCESH  | HLA DRB1*15:01, HLA DRB1*15:02, HLA DRB1*16:02                    | -0.95212997         |
|  | 6367 | LPFFYSDSPCESHG  | HLA DRB1*15:02                                                    | -0.56713728         |
|  | 6385 | VSDIDYVPLKSATCI | HLA DRB1*16:02                                                    | <b>0.15127013</b>   |
|  | 6386 | SDIDYVPLKSATCIT | HLA DRB1*16:02                                                    | -0.071389115        |
|  | 6387 | DIDYVPLKSATCITR | HLA DRB1*11:01, HLA DRB1*15:02 HLA DRB1*16:02                     | -0.0025562925       |
|  | 6388 | IDYVPLKSATCITRC | HLA DRB1*16:02                                                    | -0.14859683         |
|  | 6432 | SLWVYKQFDYTNLWN | HLA DRB1*15:02, HLA DRB1*16:02                                    | -0.3479125          |
|  | 6433 | LWVYKQFDYTNLWNT | HLA DRB1*15:02, HLA DRB1*16:02                                    | -0.23899058         |
|  | 6434 | WVYKQFDYTNLWNTF | HLA DRB1*15:02                                                    | -0.83413699         |
|  | 6454 | LENVAFNVVNKGHFD | HLA DRB1*11:01                                                    | <b>0.078742337</b>  |
|  | 6455 | ENVAFNVVNKGHFDG | HLA DRB1*11:01                                                    | -0.10097832         |
|  | 6456 | NVAFNVVNKGHFDGQ | HLA DRB1*11:01, HLA DRB1*12:02                                    | -0.23359534         |
|  | 6472 | GEVPVSIINNTVYTK | HLA DRB1*12:02                                                    | <b>0.2542538</b>    |
|  | 6473 | EVPSIINNTVYTKV  | HLA DRB1*12:02                                                    | <b>0.26756126</b>   |
|  | 6479 | INNTVYTKVDGVDVE | HLA DRB1*07:01                                                    | -0.16442255         |
|  | 6480 | NNTVYTKVDGVDVEL | HLA DRB1*07:01, HLA DRB1*16:02                                    | -0.24068554         |
|  | 6481 | NTVYTKVDGVDVELF | HLA DRB1*07:01, HLA DRB1*16:02                                    | -0.29433181         |
|  | 6487 | VDGVDVELFENKTTL | HLA DRB1*15:01                                                    | -0.04113928         |
|  | 6488 | DGVDVELFENKTTLP | HLA DRB1*15:01, HLA DRB1*15:02                                    | -0.27493986         |
|  | 6489 | GVDVELFENKTTLPV | HLA DRB1*15:01, HLA DRB1*15:02                                    | <b>0.18488388</b>   |
|  | 6490 | VDVELFENKTTLPVN | HLA DRB1*15:01                                                    | -0.16436808         |
|  | 6510 | WAKRNIKPVEVKIL  | HLA DRB1*07:01, HLA DRB1*12:02                                    | <b>0.10731795</b>   |

|  |      |                 |                                                                                                   |                    |
|--|------|-----------------|---------------------------------------------------------------------------------------------------|--------------------|
|  | 6511 | AKRNIKPVPEVKILN | HLA DRB1*07:01, HLA DRB1*12:02, HLA DRB1*15:01                                                    | -0.43686594        |
|  | 6512 | KRNIKPVPEVKILNN | HLA DRB1*07:01, HLA DRB1*12:02, HLA DRB1*15:01                                                    | -0.42446222        |
|  | 6513 | RNIKPVPEVKILNNL | HLA DRB1*12:02                                                                                    | -0.3388033         |
|  | 6516 | KPVPEVKILNNLGVD | HLA DRB1*12:02, HLA DRB1*15:01, HLA DRB1*15:02,<br>HLA DRB1*16:02                                 | -0.092818209       |
|  | 6517 | PVPEVKILNNLGVDI | HLA DRB1*12:02, HLA DRB1*15:01, HLA DRB1*15:02,<br>HLA DRB1*16:02                                 | -0.0068847756      |
|  | 6518 | VPEVKILNNLGVDIA | HLA DRB1*12:02, HLA DRB1*15:01, HLA DRB1*15:02,<br>HLA DRB1*16:02                                 | -0.25937664        |
|  | 6519 | PEVKILNNLGVDIAA | HLA DRB1*12:02, HLA DRB1*15:01, HLA DRB1*15:02,<br>HLA DRB1*16:02                                 | -0.41267881        |
|  | 6567 | ICAPLTVFFDGRVDG | HLA DRB1*15:01                                                                                    | -0.21217939        |
|  | 6568 | CAPLTVFFDGRVDGQ | HLA DRB1*15:01                                                                                    | -0.16280804        |
|  | 6569 | APLTVFFDGRVDGQV | HLA DRB1*15:01                                                                                    | -0.048799482       |
|  | 6579 | VDGQVDLFRNARNGV | HLA DRB1*15:01                                                                                    | -0.16080756        |
|  | 6623 | AVKTQFNYYKKVDGV | HLA DRB1*11:01                                                                                    | -0.51862003        |
|  | 6624 | VKTQFNYYKKVDGVV | HLA DRB1*11:01                                                                                    | -0.44180179        |
|  | 6625 | KTQFNYYKKVDGVVQ | HLA DRB1*11:01                                                                                    | -0.58921477        |
|  | 6634 | VDGVVQQLPETYFTQ | HLA DRB1*12:02                                                                                    | -0.79229209        |
|  | 6635 | DGVVQQLPETYFTQS | HLA DRB1*12:02                                                                                    | -0.74303645        |
|  | 6640 | QLPETYFTQSRNLQE | HLA DRB1*07:01, HLA DRB1*11:01                                                                    | -1.0412404         |
|  | 6641 | LPETYFTQSRNLQEF | HLA DRB1*07:01, HLA DRB1*11:01                                                                    | -1.25747           |
|  | 6642 | PETYFTQSRNLQEFK | HLA DRB1*11:01                                                                                    | -0.99697172        |
|  | 6643 | ETYFTQSRNLQEFKP | HLA DRB1*11:01                                                                                    | -1.243457          |
|  | 6669 | AMDEFIERYKLEGYA | HLA DRB1*11:01                                                                                    | -0.31591546        |
|  | 6670 | MDEFIERYKLEGYAF | HLA DRB1*11:01                                                                                    | -0.5096451         |
|  | 6725 | STVKNYFITDAQTGS | HLA DRB1*07:01                                                                                    | <b>0.067835539</b> |
|  | 6726 | TVKNYFITDAQTGSS | HLA DRB1*07:01, HLA DRB1*11:01, HLA DRB1*16:02                                                    | <b>0.087124509</b> |
|  | 6727 | VKNYFITDAQTGSSK | HLA DRB1*07:01, HLA DRB1*11:01, HLA DRB1*16:02                                                    | -0.34742572        |
|  | 6728 | KNYFITDAQTGSSKC | HLA DRB1*07:01, HLA DRB1*16:02                                                                    | -0.18720126        |
|  | 6750 | LLDDFVEIISQDLS  | HLA DRB1*07:01, HLA DRB1*11:01, HLA DRB1*15:01,<br>HLA DRB1*15:02, HLA DRB1*16:02                 | -0.27733231        |
|  | 6751 | LDDFVEIISQDLSV  | HLA DRB1*07:01, HLA DRB1*11:01, HLA DRB1*12:02,<br>HLA DRB1*15:01, HLA DRB1*15:02, HLA DRB1*16:02 | -0.04841137        |
|  | 6752 | DDFVEIISQDLSVV  | HLA DRB1*07:01, HLA DRB1*12:02, HLA DRB1*15:01,<br>HLA DRB1*15:02, HLA DRB1*16:02                 | <b>0.28882695</b>  |
|  | 6881 | AVLRQWLPTGTLLVD | HLA DRB1*07:01                                                                                    | -0.24424824        |
|  | 6882 | VLRQWLPTGTLLVDS | HLA DRB1*07:01                                                                                    | <b>0.070585924</b> |
|  | 6883 | LRQWLPTGTLLVDS  | HLA DRB1*07:01                                                                                    | <b>0.094627139</b> |
|  | 6884 | RQWLPTGTLLVDSL  | HLA DRB1*07:01                                                                                    | -0.03232637        |
|  | 6927 | SDMYDPKTKNVTEN  | HLA DRB1*11:01                                                                                    | -0.67485521        |
|  | 6956 | QQKLALGGSVAIKIT | HLA DRB1*07:01                                                                                    | <b>0.1606486</b>   |

|      |      |                     |                                                |                    |
|------|------|---------------------|------------------------------------------------|--------------------|
|      | 6957 | QKLALGGSVAIKITE     | HLA DRB1*07:01                                 | <b>0.22250627</b>  |
|      | 6958 | KLALGGSVAIKITEH     | HLA DRB1*07:01                                 | <b>0.1950708</b>   |
|      | 6982 | MGHFAWWTAFVTNV<br>N | HLA DRB1*15:02                                 | -0.25847532        |
|      | 7016 | QIDGYVMHANYIFWR     | HLA DRB1*15:02                                 | -0.44029832        |
|      | 7017 | IDGYVMHANYIFWRN     | HLA DRB1*15:02, HLA DRB1*16:02,                | -0.51529422        |
|      | 7024 | ANYIFWRNTNPIQLS     | HLA DRB1*07:01,                                | -0.44210794        |
|      | 7025 | NYIFWRNTNPIQLSS     | HLA DRB1*07:01,                                | -0.27952306        |
|      | 7026 | YIFWRNTNPIQLSSY     | HLA DRB1*07:01,                                | -0.12275809        |
|      | 7027 | IFWRNTNPIQLSSYS     | HLA DRB1*07:01,                                | -0.2564464         |
|      | 7049 | PLKLRGTAVMSLKEG     | HLA DRB1*07:01,                                | -0.081985341       |
|      | 7053 | RGTAVMSLKEGQIND     | HLA DRB1*12:02,                                | -0.38498524        |
|      | 7054 | GTAVMSLKEGQINDM     | HLA DRB1*12:02,                                | -0.68864099        |
|      | 7073 | LSKGRLIIRENNRVV     | HLA DRB1*15:01, HLA DRB1*15:02                 | <b>0.1768002</b>   |
|      | 7074 | SKGRLIIRENNRVVI     | HLA DRB1*15:01, HLA DRB1*15:02                 | <b>0.38700762</b>  |
|      | 7075 | KGRLIIRENNRVVIS     | HLA DRB1*15:01, HLA DRB1*15:02, HLA DRB1*16:02 | <b>0.78951146</b>  |
|      | 7076 | GRLIIRENNRVVISS     | HLA DRB1*15:01, HLA DRB1*15:02, HLA DRB1*16:02 | <b>0.79853065</b>  |
|      | 7082 | ENNRVVISDVLVNN      | HLA DRB1*07:01, HLA DRB1*15:01, HLA DRB1*15:02 | <b>0.79231845</b>  |
| ORF2 | 24   | LPPAYTNSFTRGVYY     | HLA DRB1*07:01                                 | <b>0.71760044</b>  |
|      | 25   | PPAYTNSFTRGVYYP     | HLA DRB1*07:01                                 | <b>0.38425103</b>  |
|      | 52   | QDLFLPFFSNVTWFH     | HLA DRB1*15:02                                 | -0.051186129       |
|      | 57   | PFFSNVTWFHAIHVS     | HLA DRB1*15:01, HLA DRB1*15:02                 | <b>0.38458522</b>  |
|      | 58   | FFSNVTWFHAIHVSG     | HLA DRB1*15:01, HLA DRB1*15:02, HLA DRB1*16:02 | <b>0.17100646</b>  |
|      | 59   | FSNVTWFHAIHVSGT     | HLA DRB1*15:01, HLA DRB1*15:02, HLA DRB1*16:02 | <b>0.094599621</b> |
|      | 60   | SNVTWFHAIHVSGTN     | HLA DRB1*15:01, HLA DRB1*15:02, HLA DRB1*16:02 | -0.056273567       |
|      | 152  | WMESEFRVYSSANNC     | HLA DRB1*15:02                                 | -0.00069338927     |
|      | 153  | MESEFRVYSSANNCT     | HLA DRB1*15:02, HLA DRB1*16:02                 | -0.23974436        |
|      | 154  | ESEFRVYSSANNCTF     | HLA DRB1*15:02, HLA DRB1*16:02                 | -0.53206807        |
|      | 181  | GKQGNFKNLREFVFK     | HLA DRB1*12:02                                 | -0.2540608         |
|      | 182  | KQGNFKNLREFVFKN     | HLA DRB1*12:02                                 | -0.39347618        |
|      | 183  | QGNFKNLREFVFKNI     | HLA DRB1*12:02                                 | -0.25063137        |
|      | 197  | IDGYFKIYSKHTPIN     | HLA DRB1*16:02                                 | -0.78037933        |
|      | 201  | FKIYSKHTPINLVRD     | HLA DRB1*07:01                                 | -0.56831252        |
|      | 207  | HTPINLVRDLPQGFS     | HLA DRB1*12:02                                 | -0.68623929        |
|      | 230  | PIGINITRFQTLAL      | HLA DRB1*15:01                                 | -0.042411043       |
|      | 231  | IGINITRFQTLALH      | HLA DRB1*15:01, HLA DRB1*15:02                 | -0.38029989        |
|      | 232  | GINITRFQTLALHR      | HLA DRB1*15:01, HLA DRB1*15:02, HLA DRB1*16:02 | <b>0.10772613</b>  |
|      | 233  | INITRFQTLALHRS      | HLA DRB1*15:01                                 | -0.0071534627      |
|      | 238  | FQTLALHRSYLTPG      | HLA DRB1*12:02                                 | <b>0.26071055</b>  |
|      | 239  | QTLALHRSYLTPGD      | HLA DRB1*15:01                                 | <b>0.19107315</b>  |

|  |     |                  |                                                                   |                    |
|--|-----|------------------|-------------------------------------------------------------------|--------------------|
|  | 306 | FTVEKGIYQTSNFRV  | HLA DRB1*07:01                                                    | <b>0.70919003</b>  |
|  | 307 | TVEKGIYQTSNFRVQ  | HLA DRB1*07:01, HLA DRB1*15:01, HLA DRB1*15:02,<br>HLA DRB1*16:02 | <b>0.45017873</b>  |
|  | 308 | VEKGIYQTSNFRVQP  | HLA DRB1*07:01, HLA DRB1*15:01, HLA DRB1*15:02,<br>HLA DRB1*16:02 | <b>0.20827026</b>  |
|  | 309 | EKGIYQTSNFRVQPT  | HLA DRB1*07:01, HLA DRB1*15:01, HLA DRB1*15:02,<br>HLA DRB1*16:02 | <b>0.46467579</b>  |
|  | 310 | KGIYQTSNFRVQPTE  | HLA DRB1*07:01, HLA DRB1*15:01, HLA DRB1*15:02,<br>HLA DRB1*16:02 | <b>0.36164402</b>  |
|  | 314 | QTSNFRVQPTESIVR  | HLA DRB1*15:02, HLA DRB1*16:02                                    | <b>0.2289089</b>   |
|  | 315 | TSNFRVQPTESIVRF  | HLA DRB1*15:02, HLA DRB1*16:02                                    | -0.20021657        |
|  | 321 | QPTESIVRFPNITNL  | HLA DRB1*15:01, HLA DRB1*15:02                                    | -0.40062756        |
|  | 322 | PTESIVRFPNITNLC  | HLA DRB1*15:01, HLA DRB1*15:02                                    | -0.20003025        |
|  | 323 | TESIVRFPNITNLCP  | HLA DRB1*15:01, HLA DRB1*15:02                                    | -0.70352647        |
|  | 324 | ESIVRFPNITNLCPF  | HLA DRB1*15:01                                                    | -0.43992195        |
|  | 343 | NATRFASVYAWNRRKR | HLA DRB1*16:02                                                    | <b>0.47646374</b>  |
|  | 344 | ATRFASVYAWNRRKRI | HLA DRB1*16:02                                                    | <b>0.5575169</b>   |
|  | 371 | SASFSTFKCYGVSP   | HLA DRB1*15:02                                                    | -0.12924041        |
|  | 428 | DFTGCVIAWNSNNLD  | HLA DRB1*15:01, HLA DRB1*15:02                                    | -0.19887616        |
|  | 429 | FTGCVIAWNSNNLDS  | HLA DRB1*15:01, HLA DRB1*15:02, HLA DRB1*16:02                    | -0.10293405        |
|  | 430 | TGCVIAWNSNNLDSK  | HLA DRB1*15:01, HLA DRB1*15:02, HLA DRB1*16:02                    | -0.19360068        |
|  | 431 | GCVIAWNSNNLDSKV  | HLA DRB1*15:01, HLA DRB1*15:02                                    | <b>0.022799683</b> |
|  | 445 | VGGNYNYLRLFRKS   | HLA DRB1*11:01                                                    | <b>0.18580082</b>  |
|  | 446 | GGNYNYLRLFRKSN   | HLA DRB1*11:01                                                    | <b>0.37362504</b>  |
|  | 492 | LQSYGFQPTNGVGYQ  | HLA DRB1*07:01                                                    | -0.045488993       |
|  | 493 | QSYGFQPTNGVGYQP  | HLA DRB1*07:01                                                    | -0.053172582       |
|  | 494 | SYGFQPTNGVGYQPY  | HLA DRB1*07:01                                                    | <b>0.18189287</b>  |
|  | 495 | YGFQPTNGVGYQPYP  | HLA DRB1*07:01                                                    | -0.079340724       |
|  | 500 | TNGVGYQPYPVVLS   | HLA DRB1*15:02                                                    | -0.035053106       |
|  | 501 | NGVGYQPYPVVLSF   | HLA DRB1*15:02                                                    | -0.036467885       |
|  | 502 | GVGYQPYPVVLSFE   | HLA DRB1*15:02, HLA DRB1*16:02                                    | <b>0.28627417</b>  |
|  | 556 | NKKFLPFQQFGRDIA  | HLA DRB1*16:02                                                    | <b>0.15230751</b>  |
|  | 631 | PTWRVYSTGSNVFQT  | HLA DRB1*07:01                                                    | <b>0.015274183</b> |
|  | 632 | TWRVYSTGSNVFQTR  | HLA DRB1*07:01                                                    | <b>0.10894371</b>  |
|  | 680 | SPRRARSVASQSIIA  | HLA DRB1*07:01                                                    | <b>0.47297351</b>  |
|  | 681 | PRRARSVASQSIAY   | HLA DRB1*07:01                                                    | <b>0.67693256</b>  |
|  | 689 | SQSIAYTMSLGAEN   | HLA DRB1*07:01, HLA DRB1*15:01,                                   | <b>0.10021838</b>  |
|  | 690 | QSIAYTMSLGAENS   | HLA DRB1*07:01                                                    | <b>0.01474098</b>  |
|  | 712 | IAIPTNFTISVTTEI  | HLA DRB1*07:01                                                    | -0.019108711       |
|  | 713 | AIPTNFTISVTTEIL  | HLA DRB1*07:01                                                    | -0.20095993        |
|  | 714 | IPTNFTISVTTEILP  | HLA DRB1*07:01                                                    | -0.47793484        |

|  |      |                  |                                                |                     |
|--|------|------------------|------------------------------------------------|---------------------|
|  | 715  | PTNFTISVTTEILPV  | HLA DRB1*07:01                                 | <b>0.0062863218</b> |
|  | 716  | TNFTISVTTEILPVS  | HLA DRB1*07:01                                 | -0.1175069          |
|  | 776  | KNTQEVEFAQVKQIYK | HLA DRB1*12:02                                 | -0.50438727         |
|  | 777  | NTQEVEFAQVKQIYKT | HLA DRB1*12:02                                 | -0.49230135         |
|  | 778  | TQEVEFAQVKQIYKTP | HLA DRB1*12:02                                 | -0.555042           |
|  | 779  | QEVEFAQVKQIYKTPP | HLA DRB1*12:02                                 | -0.69815401         |
|  | 789  | YKTPPIKDFGGFNFS  | HLA DRB1*15:01, HLA DRB1*15:02                 | -0.44883338         |
|  | 790  | KTPPIKDFGGFNFSQ  | HLA DRB1*15:01, HLA DRB1*15:02, HLA DRB1*16:02 | -0.36848437         |
|  | 791  | TPPIKDFGGFNFSQI  | HLA DRB1*15:01, HLA DRB1*15:02, HLA DRB1*16:02 | -0.19527993         |
|  | 792  | PPIKDFGGFNFSQIL  | HLA DRB1*15:01, HLA DRB1*15:02                 | -0.19573394         |
|  | 797  | FGGFNFSQILPDSK   | HLA DRB1*07:01                                 | -0.4760424          |
|  | 830  | DAGFIKQYGDCLGDI  | HLA DRB1*15:01                                 | -0.26608933         |
|  | 831  | AGFIKQYGDCLGDIA  | HLA DRB1*15:01                                 | -0.22414894         |
|  | 864  | LLTDEMIAQYTSALL  | HLA DRB1*15:01, HLA DRB1*15:02                 | <b>0.2463336</b>    |
|  | 865  | LTDEMIAQYTSALLA  | HLA DRB1*15:01, HLA DRB1*15:02, HLA DRB1*16:02 | <b>0.086392148</b>  |
|  | 866  | TDEMIAQYTSALLAG  | HLA DRB1*15:01, HLA DRB1*15:02, HLA DRB1*16:02 | <b>0.0082184443</b> |
|  | 867  | DEMIAQYTSALLAGT  | HLA DRB1*15:01, HLA DRB1*15:02, HLA DRB1*16:02 | <b>0.15716941</b>   |
|  | 868  | EMIAQYTSALLAGTI  | HLA DRB1*15:01, HLA DRB1*15:02, HLA DRB1*16:02 | <b>0.14667354</b>   |
|  | 869  | MIAQYTSALLAGTIT  | HLA DRB1*15:01                                 | <b>0.04890301</b>   |
|  | 894  | LQIPFAMQMAYRFNG  | HLA DRB1*12:02                                 | -0.21947589         |
|  | 911  | VTQNVLYENQKLIAN  | HLA DRB1*15:01                                 | -0.27091446         |
|  | 955  | NAQALNTLVKQLSSN  | HLA DRB1*11:01                                 | -0.68803277         |
|  | 956  | AQALNTLVKQLSSNF  | HLA DRB1*11:01                                 | -0.67563689         |
|  | 977  | LNDILSRDKVEAEV   | HLA DRB1*11:01                                 | -0.32644775         |
|  | 978  | NDILSRDKVEAEVQ   | HLA DRB1*11:01, HLA DRB1*12:02                 | -0.47575273         |
|  | 988  | EAEVQIDRLITGRLQ  | HLA DRB1*12:02                                 | -0.18209317         |
|  | 989  | AEVQIDRLITGRLQS  | HLA DRB1*12:02                                 | -0.083411268        |
|  | 990  | EVQIDRLITGRLQSL  | HLA DRB1*12:02                                 | -0.2821438          |
|  | 1000 | RLQSLQTYVTQQLIR  | HLA DRB1*15:01, HLA DRB1*15:02                 | -0.18959048         |
|  | 1001 | LQSLQTYVTQQLIRA  | HLA DRB1*15:01, HLA DRB1*15:02                 | -0.050704469        |
|  | 1002 | QSLQTYVTQQLIRAA  | HLA DRB1*15:01, HLA DRB1*15:02                 | -0.014520542        |
|  | 1014 | RAAEIRASANLAATK  | HLA DRB1*15:01, HLA DRB1*15:02                 | <b>0.29346657</b>   |
|  | 1015 | AAEIRASANLAATKM  | HLA DRB1*15:01, HLA DRB1*15:02                 | -0.084387697        |
|  | 1057 | PHGVVFLHVTYVPAQ  | HLA DRB1*12:02                                 | <b>0.0027038643</b> |
|  | 1110 | YEPQIITDNTFVSG   | HLA DRB1*07:01, HLA DRB1*15:02                 | -0.55271887         |
|  | 1111 | EPQIITDNTFVSGN   | HLA DRB1*07:01, HLA DRB1*15:02, HLA DRB1*16:02 | -0.3530133          |
|  | 1126 | CDVVIGIVNNTVYDP  | HLA DRB1*12:02, HLA DRB1*15:01, HLA DRB1*15:02 | -0.38779121         |
|  | 1127 | DVVIGIVNNTVYDPL  | HLA DRB1*15:01, HLA DRB1*15:02                 | -0.15210975         |
|  | 1151 | ELDKYFKNHTSPDVD  | HLA DRB1*07:01, HLA DRB1*15:02, HLA DRB1*16:02 | -0.40577462         |
|  | 1152 | LDKYFKNHTSPVDL   | HLA DRB1*07:01, HLA DRB1*15:02, HLA DRB1*16:02 | -0.7444172          |

|      |      |                 |                                                                                |                   |
|------|------|-----------------|--------------------------------------------------------------------------------|-------------------|
|      | 1153 | DKYFKNHTSPDVLG  | HLA DRB1*07:01, HLA DRB1*15:02, HLA DRB1*16:02                                 | -0.4953733        |
| ORF4 | 51   | LVKPSFYVYSRVKNL | HLA DRB1*07:01                                                                 | -0.39721306       |
|      | 52   | VKPSFYVYSRVKNLN | HLA DRB1*07:01, HLA DRB1*11:01                                                 | -0.46468316       |
|      | 53   | KPSFYVYSRVKNLNS | HLA DRB1*07:01, HLA DRB1*11:01                                                 | -0.52339177       |
|      | 54   | PSFYVYSRVKNLNSS | HLA DRB1*07:01                                                                 | -0.35688916       |
|      | 55   | SFYVYSRVKNLNSSR | HLA DRB1*07:01                                                                 | -0.4195908        |
|      | 58   | VYSRVKNLNSSRVDP | HLA DRB1*12:02, HLA DRB1*15:01, HLA DRB1*15:02, HLA DRB1*16:02                 | -0.18705221       |
|      | 59   | YSRVKNLNSSRVDDL | HLA DRB1*12:02, HLA DRB1*15:01, HLA DRB1*15:02, HLA DRB1*16:02                 | -0.45329667       |
| ORF5 | 95   | YFIASFRLFARTRSM | HLA DRB1*11:01                                                                 | -0.35658933       |
|      | 96   | FIASFRLFARTRSMW | HLA DRB1*11:01                                                                 | -0.3109081        |
|      | 97   | IASFRLFARTRSMWS | HLA DRB1*11:01                                                                 | -0.29170845       |
|      | 98   | ASFRLFARTRSMWSF | HLA DRB1*11:01                                                                 | -0.27314175       |
|      | 109  | MWSFNPETNILLNVP | HLA DRB1*15:02, HLA DRB1*16:02                                                 | -1.0296371        |
|      | 144  | ILRGHLRIAGHHLGR | HLA DRB1*11:01                                                                 | <b>0.196423</b>   |
|      | 145  | LRGHLRIAGHHLGRC | HLA DRB1*11:01                                                                 | <b>0.2459722</b>  |
|      | 146  | RGHLRIAGHHLGRCD | HLA DRB1*11:01                                                                 | -0.18255298       |
|      | 162  | KDLPKEITVATSRTL | HLA DRB1*07:01                                                                 | -0.46025371       |
|      | 163  | DLPKEITVATSRTLS | HLA DRB1*07:01, HLA DRB1*15:01, HLA DRB1*15:02, HLA DRB1*16:02                 | -0.36193098       |
|      | 164  | LPKEITVATSRTLSY | HLA DRB1*07:01, HLA DRB1*12:02, HLA DRB1*15:01, HLA DRB1*15:02, HLA DRB1*16:02 | -0.17020992       |
|      | 165  | PKEITVATSRTLSYY | HLA DRB1*07:01, HLA DRB1*12:02, HLA DRB1*15:01, HLA DRB1*15:02, HLA DRB1*16:02 | <b>0.2121047</b>  |
|      | 166  | KEITVATSRTLSYYK | HLA DRB1*07:01, HLA DRB1*15:01                                                 | -0.22983445       |
|      | 175  | TLSYYKLGASQRVAG | HLA DRB1*07:01, HLA DRB1*16:02                                                 | <b>0.16141022</b> |
|      | 176  | LSYYKLGASQRVAGD | HLA DRB1*07:01, HLA DRB1*16:02                                                 | <b>0.19286477</b> |
|      | 177  | SYKLGASQRVAGDS  | HLA DRB1*07:01                                                                 | <b>0.1701859</b>  |
| ORF9 | 49   | TASWFTALTQHGKED | HLA DRB1*11:01                                                                 | -0.079044179      |
|      | 84   | IGYYRRATRRIRGGD | HLA DRB1*11:01                                                                 | <b>0.6416295</b>  |
|      | 127  | KDGIWVATEGALNT  | HLA DRB1*15:01                                                                 | <b>0.36131254</b> |
|      | 129  | GIIWVATEGALNTPK | HLA DRB1*07:01                                                                 | <b>0.49614189</b> |
|      | 167  | LPKGFYAEGSRGGSQ | HLA DRB1*11:01, HLA DRB1*16:02                                                 | -0.46909126       |
|      | 168  | PKGFYAEGSRGGSQA | HLA DRB1*11:01, HLA DRB1*16:02                                                 | -0.023816502      |
|      | 263  | TATKAYNVTQAFGRR | HLA DRB1*07:01                                                                 | -0.35284528       |
|      | 264  | ATKAYNVTQAFGRRG | HLA DRB1*07:01, HLA DRB1*16:02                                                 | -0.41990668       |
|      | 265  | TKAYNVTQAFGRRGP | HLA DRB1*07:01, HLA DRB1*16:02                                                 | -0.89365915       |
|      | 266  | KAYNVTQAFGRRGPE | HLA DRB1*16:02                                                                 | -0.76630992       |
|      | 302  | PQIAQFAPSASAFFG | HLA DRB1*07:01                                                                 | <b>0.72358869</b> |
|      | 303  | QIAQFAPSASAFFGM | HLA DRB1*07:01                                                                 | <b>0.83655244</b> |

|  |     |                 |                                                |                     |
|--|-----|-----------------|------------------------------------------------|---------------------|
|  | 304 | IAQFAPSASAFFGMS | HLA DRB1*07:01                                 | <b>1.0616777</b>    |
|  | 309 | PSASAFFGMSRIGME | HLA DRB1*11:01                                 | <b>0.94891009</b>   |
|  | 310 | SASAFFGMSRIGMEV | HLA DRB1*11:01                                 | <b>0.79707565</b>   |
|  | 311 | ASAFFGMSRIGMEVT | HLA DRB1*11:01                                 | <b>0.085634049</b>  |
|  | 325 | TPSGTWLTYTGAIKL | HLA DRB1*07:01                                 | <b>0.12699857</b>   |
|  | 326 | PSGTWLTYTGAIKLD | HLA DRB1*07:01                                 | <b>0.0035100729</b> |
|  | 327 | SGTWLTYTGAIKLDD | HLA DRB1*07:01, HLA DRB1*15:02, HLA DRB1*16:02 | -0.3048811          |
|  | 328 | GTWLTYTGAIKLDDK | HLA DRB1*07:01, HLA DRB1*15:02, HLA DRB1*16:02 | -0.13745422         |
|  | 329 | TWLTYTGAIKLDDKD | HLA DRB1*07:01                                 | -0.21623699         |
|  | 330 | WLTYTGAIKLDDKDP | HLA DRB1*07:01                                 | -0.5483585          |
|  | 345 | NFKDQVILLNKHIDA | HLA DRB1*11:01, HLA DRB1*12:02                 | <b>0.1690602</b>    |
|  | 346 | FKDQVILLNKHIDAY | HLA DRB1*11:01, HLA DRB1*12:02                 | <b>0.29690561</b>   |
|  | 347 | KDQVILLNKHIDAYK | HLA DRB1*11:01, HLA DRB1*12:02                 | <b>0.28910866</b>   |
|  | 348 | DQVILLNKHIDAYKT | HLA DRB1*11:01, HLA DRB1*12:02                 | <b>0.13183953</b>   |
|  | 351 | ILLNKHIDAYKTFPP | HLA DRB1*15:01                                 | -0.60424218         |
|  | 352 | LLNKHIDAYKTFPPT | HLA DRB1*15:01, HLA DRB1*15:02                 | -0.58679713         |
|  | 353 | LNKHIDAYKTFPPTE | HLA DRB1*15:01, HLA DRB1*15:02, HLA DRB1*16:02 | -0.50811758         |
|  | 354 | NKHIDAYKTFPPTEP | HLA DRB1*15:01, HLA DRB1*15:02, HLA DRB1*16:02 | -0.68356588         |
|  | 355 | KHIDAYKTFPPTEPK | HLA DRB1*15:01, HLA DRB1*15:02                 | -0.64058568         |
|  | 356 | HIDAYKTFPPTEPKK | HLA DRB1*15:01                                 | -0.73433853         |
|  | 387 | KKQQTVTLLPAADLD | HLA DRB1*12:02                                 | <b>0.097605744</b>  |
|  | 388 | KQQTVTLLPAADLDD | HLA DRB1*12:02                                 | -0.18353366         |
|  | 389 | QQTVTLLPAADLDDF | HLA DRB1*12:02                                 | -0.27974059         |
